# Supplementary material
Source: publisher figshare collection journal article supplement (https://frontiersin.figshare.com/ndownloader/files/14809913)
Supplement: Supplementary file 1 [file 14809913]

## OR accession numbers
PSN58269.1 Odorant receptor 88 [Blattella germanica]
PSN57631.1 Odorant receptor 123 [Blattella germanica]
PSN57630.1 Odorant receptor 119 [Blattella germanica]
PSN56983.1 Odorant receptor 37 [Blattella germanica]
PSN56982.1 Odorant receptor 35 [Blattella germanica]
PSN56382.1 Odorant receptor 118 [Blattella germanica]
PSN55723.1 Odorant receptor 57a [Blattella germanica]
PSN55722.1 Odorant receptor 56 [Blattella germanica]
PSN55634.1 Odorant receptor 49 [Blattella germanica]
PSN55029.1 Odorant receptor Or2 [Blattella germanica]
PSN55028.1 Odorant receptor 61 [Blattella germanica]
PSN53708.1 Odorant receptor 40 [Blattella germanica]
PSN53707.1 Odorant receptor 39 [Blattella germanica]
PSN53706.1 Odorant receptor 41 [Blattella germanica]
PSN53705.1 Odorant receptor 43 [Blattella germanica]
PSN53663.1 Odorant receptor 2 [Blattella germanica]
PSN53662.1 Odorant receptor 1 [Blattella germanica]
PSN53052.1 Odorant receptor 90 [Blattella germanica]
PSN52858.1 Odorant receptor 80 [Blattella germanica]
PSN50593.1 Odorant receptor 55a [Blattella germanica]
PSN50592.1 Odorant receptor 55a [Blattella germanica]
PSN50591.1 Odorant receptor 55a [Blattella germanica]
PSN50590.1 Odorant receptor 55a [Blattella germanica]
PSN50415.1 Odorant receptor 59 [Blattella germanica]
PSN50405.1 Odorant receptor 77, partial [Blattella germanica]
PSN50107.1 Odorant receptor 86 [Blattella germanica]
PSN50106.1 Odorant receptor 84 [Blattella germanica]
PSN50105.1 Odorant receptor 85 [Blattella germanica]
PSN50104.1 Odorant receptor 87 [Blattella germanica]
PSN49991.1 Odorant receptor 19 [Blattella germanica]
PSN49969.1 Odorant receptor 20 [Blattella germanica]
PSN49968.1 Odorant receptor 17 [Blattella germanica]
PSN49289.1 Odorant receptor 114 [Blattella germanica]
PSN49285.1 Odorant receptor 112 [Blattella germanica]
PSN49282.1 Odorant receptor 95 [Blattella germanica]
PSN49281.1 Odorant receptor 96 [Blattella germanica]
PSN49273.1 Odorant receptor 91 [Blattella germanica]
PSN49007.1 Odorant receptor 68 [Blattella germanica]
PSN48875.1 Odorant receptor 34 [Blattella germanica]
PSN48182.1 Odorant receptor 69 [Blattella germanica]
PSN47655.1 Odorant receptor 74 [Blattella germanica]
PSN47627.1 Odorant receptor 75 [Blattella germanica]
PSN47015.1 Odorant receptor 38 [Blattella germanica]
PSN46090.1 Odorant receptor 63 [Blattella germanica]
PSN46068.1 Odorant receptor 65 [Blattella germanica]
PSN46067.1 Odorant receptor 62 [Blattella germanica]
PSN45737.1 Odorant receptor 102 [Blattella germanica]
PSN45630.1 Odorant receptor 97 [Blattella germanica]
PSN45085.1 Odorant receptor 98 [Blattella germanica]
PSN44739.1 Odorant receptor 72 [Blattella germanica]
PSN44738.1 Odorant receptor 73 [Blattella germanica]
PSN44388.1 Odorant receptor 48 [Blattella germanica]
PSN44116.1 Odorant receptor 67 [Blattella germanica]
PSN43949.1 Odorant receptor 71 [Blattella germanica]
PSN42707.1 Odorant receptor Or2 [Blattella germanica]
PSN41230.1 Odorant receptor 3 [Blattella germanica]
PSN41229.1 Odorant receptor 5 [Blattella germanica]
PSN41221.1 Odorant receptor 6 [Blattella germanica]
PSN41220.1 Odorant receptor 7a [Blattella germanica]
PSN41219.1 Odorant receptor 7a [Blattella germanica]
PSN40045.1 Odorant receptor 54 [Blattella germanica]
PSN39983.1 Odorant receptor coreceptor [Blattella germanica]
PSN39644.1 Odorant receptor 76 [Blattella germanica]
PSN38988.1 Odorant receptor 66 [Blattella germanica]
PSN37988.1 Odorant receptor 36 [Blattella germanica]
PSN37619.1 Odorant receptor 24 [Blattella germanica]
PSN37618.1 Odorant receptor 30 [Blattella germanica]
PSN37617.1 Odorant receptor 31 [Blattella germanica]
PSN37616.1 Odorant receptor 29 [Blattella germanica]
PSN37615.1 Odorant receptor 27 [Blattella germanica]
PSN37614.1 Odorant receptor 22 [Blattella germanica]
PSN37154.1 Odorant receptor 58 [Blattella germanica]
PSN36547.1 Odorant receptor 103 [Blattella germanica]
PSN35840.1 Odorant receptor 89 [Blattella germanica]
PSN35482.1 Odorant receptor 51a [Blattella germanica]
PSN35481.1 Odorant receptor 51a [Blattella germanica]
PSN35479.1 Odorant receptor 50d [Blattella germanica]
PSN35478.1 Odorant receptor 50d [Blattella germanica]
PSN33931.1 Odorant receptor 32 [Blattella germanica]
PSN33454.1 Odorant receptor 14 [Blattella germanica]
PSN33453.1 Odorant receptor 12 [Blattella germanica]
PSN33452.1 Odorant receptor 11 [Blattella germanica]
PSN33451.1 Odorant receptor 15 [Blattella germanica]
PSN33450.1 Odorant receptor 9 [Blattella germanica]
PSN33449.1 Odorant receptor 10 [Blattella germanica]
PSN32184.1 Odorant receptor 109 [Blattella germanica]
PSN32183.1 Odorant receptor 107 [Blattella germanica]
PSN32182.1 Odorant receptor 106 [Blattella germanica]
PSN32181.1 Odorant receptor 110 [Blattella germanica]
PSN30186.1 Odorant receptor 53 [Blattella germanica]
PSN30185.1 Odorant receptor 52 [Blattella germanica]
PSN29873.1 Odorant receptor 45 [Blattella germanica]
XP_023708399.1 odorant receptor 4-like [Cryptotermes secundus]
XP_023706094.1 odorant receptor 2a-like [Cryptotermes secundus]
XP_023706091.1 odorant receptor 2a-like isoform X1 [Cryptotermes secundus]
XP_023706090.1 odorant receptor 2a-like isoform X1 [Cryptotermes secundus]
XP_023706089.1 odorant receptor 2a-like isoform X1 [Cryptotermes secundus]
XP_023706088.1 odorant receptor 43a-like [Cryptotermes secundus]
XP_023706085.1 putative odorant receptor 85e [Cryptotermes secundus]
XP_023706083.1 odorant receptor 4-like [Cryptotermes secundus]
XP_023706081.1 odorant receptor Or2-like [Cryptotermes secundus]
XP_023704140.1 odorant receptor 4-like [Cryptotermes secundus]
XP_023703723.1 odorant receptor 30a-like [Cryptotermes secundus]
XP_023701861.1 odorant receptor 2a-like isoform X2 [Cryptotermes secundus]
XP_023701860.1 odorant receptor 2a-like isoform X1 [Cryptotermes secundus]
XP_023701432.1 gustatory and odorant receptor 24-like, partial [Cryptotermes secundus]
XP_023727560.1 odorant receptor 67a-like [Cryptotermes secundus]
XP_023724025.1 odorant receptor 85b-like [Cryptotermes secundus]
XP_023723775.1 odorant receptor 85b-like isoform X1 [Cryptotermes secundus]
XP_023723769.1 odorant receptor 85b-like isoform X3 [Cryptotermes secundus]
XP_023723766.1 odorant receptor coreceptor-like isoform X1 [Cryptotermes secundus]
XP_023722581.1 odorant receptor coreceptor-like [Cryptotermes secundus]
XP_023722577.1 odorant receptor 49b-like [Cryptotermes secundus]
XP_023721131.1 odorant receptor coreceptor-like [Cryptotermes secundus]
XP_023721128.1 odorant receptor coreceptor-like isoform X1 [Cryptotermes secundus]
XP_023721125.1 odorant receptor coreceptor-like isoform X1 [Cryptotermes secundus]
XP_023721109.1 odorant receptor 83a-like [Cryptotermes secundus]
XP_023721107.1 odorant receptor 83a-like, partial [Cryptotermes secundus]
XP_023724790.1 odorant receptor 13a-like [Cryptotermes secundus]
XP_023717203.1 gustatory and odorant receptor 24-like [Cryptotermes secundus]
XP_023717202.1 gustatory and odorant receptor 24-like [Cryptotermes secundus]
XP_023717014.1 gustatory and odorant receptor 22-like isoform X3 [Cryptotermes secundus]
XP_023717012.1 gustatory and odorant receptor 63a-like isoform X1 [Cryptotermes secundus]
XP_023717011.1 gustatory and odorant receptor 24-like isoform X2 [Cryptotermes secundus]
XP_023717010.1 gustatory and odorant receptor 24-like isoform X1 [Cryptotermes secundus]
XP_023717009.1 odorant receptor 2a-like [Cryptotermes secundus]
XP_023717001.1 odorant receptor 2a-like [Cryptotermes secundus]
XP_023716999.1 odorant receptor coreceptor-like [Cryptotermes secundus]
XP_023716997.1 putative odorant receptor 69a [Cryptotermes secundus]
XP_023716993.1 gustatory and odorant receptor 24-like [Cryptotermes secundus]
XP_023716992.1 gustatory and odorant receptor 24-like [Cryptotermes secundus]
XP_023716986.1 odorant receptor 7a-like isoform X1 [Cryptotermes secundus]
XP_023716973.1 odorant receptor 85b-like [Cryptotermes secundus]
XP_023716972.1 odorant receptor 85b-like [Cryptotermes secundus]
XP_023716909.1 odorant receptor 49b-like [Cryptotermes secundus]
XP_023716908.1 odorant receptor 49b-like [Cryptotermes secundus]
XP_023716907.1 odorant receptor 49b-like [Cryptotermes secundus]
XP_023716906.1 odorant receptor 49b-like [Cryptotermes secundus]
XP_023716643.1 odorant receptor coreceptor [Cryptotermes secundus]
XP_023716330.1 gustatory and odorant receptor 24-like [Cryptotermes secundus]
XP_023716271.1 odorant receptor 49b-like [Cryptotermes secundus]
XP_023715214.1 odorant receptor 49b-like [Cryptotermes secundus]
XP_023713960.1 gustatory and odorant receptor 24-like [Cryptotermes secundus]
XP_023713426.1 odorant receptor coreceptor-like [Cryptotermes secundus]
XP_023713362.1 odorant receptor 67c-like [Cryptotermes secundus]
XP_023712529.1 odorant receptor Or2-like [Cryptotermes secundus]
XP_023711929.1 odorant receptor Or2-like [Cryptotermes secundus]
XP_023709821.1 odorant receptor coreceptor-like [Cryptotermes secundus]
XP_023703637.1 odorant receptor 2a-like [Cryptotermes secundus]
PNF24458.1 Odorant receptor coreceptor [Cryptotermes secundus]
XP_021941933.1 odorant receptor Or2-like, partial [Zootermopsis nevadensis]
XP_021941932.1 odorant receptor 2a-like [Zootermopsis nevadensis]
XP_021941930.1 odorant receptor 2a-like isoform X1 [Zootermopsis nevadensis]
XP_021941926.1 odorant receptor 2a-like [Zootermopsis nevadensis]
XP_021941925.1 odorant receptor 2a-like [Zootermopsis nevadensis]
XP_021941235.1 odorant receptor 4-like [Zootermopsis nevadensis]
XP_021941233.1 odorant receptor 2a-like isoform X2 [Zootermopsis nevadensis]
XP_021941232.1 odorant receptor 2a-like isoform X1 [Zootermopsis nevadensis]
XP_021941230.1 odorant receptor 2a-like isoform X1 [Zootermopsis nevadensis]
XP_021941222.1 odorant receptor 85c-like [Zootermopsis nevadensis]
XP_021941208.1 odorant receptor 2a-like [Zootermopsis nevadensis]
XP_021940274.1 gustatory and odorant receptor 24-like [Zootermopsis nevadensis]
XP_021939805.1 odorant receptor 22b-like [Zootermopsis nevadensis]
XP_021937489.1 odorant receptor 85b-like [Zootermopsis nevadensis]
XP_021936751.1 putative odorant receptor 71a [Zootermopsis nevadensis]
XP_021936592.1 odorant receptor 49b-like [Zootermopsis nevadensis]
XP_021936578.1 odorant receptor 4-like [Zootermopsis nevadensis]
XP_021935027.1 odorant receptor Or2-like [Zootermopsis nevadensis]
XP_021934877.1 odorant receptor 13a-like isoform X3 [Zootermopsis nevadensis]
XP_021934671.1 odorant receptor Or2-like [Zootermopsis nevadensis]
XP_021933832.1 gustatory and odorant receptor 24-like [Zootermopsis nevadensis]
XP_021933831.1 gustatory and odorant receptor 24-like [Zootermopsis nevadensis]
XP_021933830.1 gustatory and odorant receptor 24-like [Zootermopsis nevadensis]
XP_021933829.1 gustatory and odorant receptor 24-like [Zootermopsis nevadensis]
XP_021933828.1 gustatory and odorant receptor 24-like [Zootermopsis nevadensis]
XP_021933827.1 gustatory and odorant receptor 24-like [Zootermopsis nevadensis]
XP_021933826.1 gustatory and odorant receptor 24-like [Zootermopsis nevadensis]
XP_021933717.1 odorant receptor coreceptor-like [Zootermopsis nevadensis]
XP_021933716.1 odorant receptor 45b-like, partial [Zootermopsis nevadensis]
XP_021933696.1 odorant receptor 49b-like, partial [Zootermopsis nevadensis]
XP_021933609.1 odorant receptor coreceptor [Zootermopsis nevadensis]
XP_021932574.1 odorant receptor 49b-like [Zootermopsis nevadensis]
XP_021930740.1 odorant receptor 85b-like [Zootermopsis nevadensis]
XP_021929975.1 odorant receptor 49b-like [Zootermopsis nevadensis]
XP_021929943.1 odorant receptor 94a-like [Zootermopsis nevadensis]
XP_021929942.1 odorant receptor coreceptor-like [Zootermopsis nevadensis]
XP_021929884.1 odorant receptor coreceptor-like [Zootermopsis nevadensis]
XP_021929495.1 gustatory and odorant receptor 24-like [Zootermopsis nevadensis]
XP_021929494.1 gustatory and odorant receptor 24-like [Zootermopsis nevadensis]
XP_021929371.1 odorant receptor 49b-like [Zootermopsis nevadensis]
XP_021929362.1 odorant receptor coreceptor-like isoform X3 [Zootermopsis nevadensis]
XP_021929361.1 odorant receptor coreceptor-like isoform X3 [Zootermopsis nevadensis]
XP_021929359.1 odorant receptor coreceptor-like isoform X1 [Zootermopsis nevadensis]
XP_021928659.1 odorant receptor 83a-like [Zootermopsis nevadensis]
XP_021928545.1 odorant receptor 13a-like [Zootermopsis nevadensis]
XP_021928009.1 odorant receptor 2a-like [Zootermopsis nevadensis]
XP_021928007.1 odorant receptor 2a-like isoform X1 [Zootermopsis nevadensis]
XP_021925437.1 odorant receptor Or2-like [Zootermopsis nevadensis]
XP_021925435.1 odorant receptor 82a-like [Zootermopsis nevadensis]
XP_021923739.1 odorant receptor coreceptor-like [Zootermopsis nevadensis]
XP_021923724.1 odorant receptor 4-like [Zootermopsis nevadensis]
XP_021923636.1 odorant receptor 85f-like [Zootermopsis nevadensis]
XP_021922817.1 gustatory and odorant receptor 22-like [Zootermopsis nevadensis]
XP_021922814.1 gustatory and odorant receptor 24-like isoform X3 [Zootermopsis nevadensis]
XP_021922813.1 gustatory and odorant receptor 24-like isoform X2 [Zootermopsis nevadensis]
XP_021922812.1 gustatory and odorant receptor 24-like isoform X1 [Zootermopsis nevadensis]
XP_021922809.1 gustatory and odorant receptor 63a-like [Zootermopsis nevadensis]
XP_021920428.1 gustatory and odorant receptor 24-like [Zootermopsis nevadensis]
XP_021920425.1 odorant receptor 2a-like [Zootermopsis nevadensis]
XP_021920423.1 odorant receptor 43a-like [Zootermopsis nevadensis]
XP_021920422.1 odorant receptor 2a-like [Zootermopsis nevadensis]
XP_021920365.1 odorant receptor 2a-like [Zootermopsis nevadensis]
XP_021920349.1 putative odorant receptor 92a [Zootermopsis nevadensis]
XP_021920347.1 odorant receptor 2a-like [Zootermopsis nevadensis]
XP_021920311.1 gustatory and odorant receptor 24-like [Zootermopsis nevadensis]
XP_021920294.1 gustatory and odorant receptor 24-like isoform X2 [Zootermopsis nevadensis]
XP_021920293.1 gustatory and odorant receptor 24-like isoform X1 [Zootermopsis nevadensis]
XP_021920292.1 gustatory and odorant receptor 24-like isoform X1 [Zootermopsis nevadensis]
XP_021920291.1 gustatory and odorant receptor 24-like isoform X1 [Zootermopsis nevadensis]
XP_021920290.1 gustatory and odorant receptor 63a-like [Zootermopsis nevadensis]
XP_021919778.1 odorant receptor coreceptor-like, partial [Zootermopsis nevadensis]
XP_021919777.1 odorant receptor 49b-like [Zootermopsis nevadensis]
XP_021919767.1 odorant receptor 2a-like [Zootermopsis nevadensis]
XP_021919766.1 odorant receptor 4-like [Zootermopsis nevadensis]
XP_021916233.1 odorant receptor 2a-like [Zootermopsis nevadensis]
XP_021915626.1 odorant receptor 2a-like isoform X2 [Zootermopsis nevadensis]
XP_021915284.1 odorant receptor 49b-like [Zootermopsis nevadensis]
XP_021915039.1 gustatory and odorant receptor 24-like [Zootermopsis nevadensis]
XP_021915038.1 gustatory and odorant receptor 21a-like isoform X2 [Zootermopsis nevadensis]
XP_021915037.1 gustatory and odorant receptor 24-like isoform X1 [Zootermopsis nevadensis]
XP_021915032.1 gustatory and odorant receptor 63a-like [Zootermopsis nevadensis]
XP_021915025.1 odorant receptor 67c-like [Zootermopsis nevadensis]
XP_021914448.1 odorant receptor 2a-like [Zootermopsis nevadensis]
XP_021912980.1 odorant receptor coreceptor-like [Zootermopsis nevadensis]
XP_021912978.1 odorant receptor coreceptor-like isoform X2 [Zootermopsis nevadensis]
XP_021912977.1 odorant receptor coreceptor-like isoform X1 [Zootermopsis nevadensis]
XP_021942932.1 odorant receptor 67c-like [Zootermopsis nevadensis]
XP_021926083.1 odorant receptor coreceptor-like [Zootermopsis nevadensis]
XP_021925584.1 gustatory and odorant receptor 24-like [Zootermopsis nevadensis]
XP_021924790.1 odorant receptor 2a-like [Zootermopsis nevadensis]
XP_021913238.1 gustatory and odorant receptor 24-like [Zootermopsis nevadensis]
XP_021913227.1 gustatory and odorant receptor 63a-like isoform X4 [Zootermopsis nevadensis]
XP_021913221.1 gustatory and odorant receptor 24-like isoform X3 [Zootermopsis nevadensis]
XP_021913213.1 gustatory and odorant receptor 24-like isoform X3 [Zootermopsis nevadensis]
XP_021913203.1 gustatory and odorant receptor 24-like isoform X2 [Zootermopsis nevadensis]
XP_021913190.1 gustatory and odorant receptor 24-like isoform X1 [Zootermopsis nevadensis]
BAU20249.1 putative odorant receptor, partial [Reticulitermes speratus]
BAU20248.1 putative odorant receptor [Reticulitermes speratus]
BAU20247.1 putative odorant receptor [Reticulitermes speratus]
BAU20246.1 putative odorant receptor, partial [Reticulitermes speratus]
BAU20245.1 putative odorant receptor [Reticulitermes speratus]
BAU20244.1 putative odorant receptor [Reticulitermes speratus]
BAU20243.1 putative odorant receptor, partial [Reticulitermes speratus]
BAU20242.1 putative odorant receptor, partial [Reticulitermes speratus]
BAU20241.1 putative odorant receptor, partial [Reticulitermes speratus]
BAU20240.1 putative odorant receptor co-receptor [Reticulitermes speratus]
BAU20239.1 putative odorant receptor, partial [Reticulitermes speratus]
BAU20238.1 putative odorant receptor, partial [Reticulitermes speratus]
BAU20237.1 putative odorant receptor [Reticulitermes speratus]
BAU20236.1 putative odorant receptor [Reticulitermes speratus]
BAU20235.1 putative odorant receptor, partial [Reticulitermes speratus]
BAU20234.1 putative odorant receptor [Reticulitermes speratus]
BAU20233.1 putative odorant receptor, partial [Reticulitermes speratus]
BAU20232.1 putative odorant receptor, partial [Reticulitermes speratus]
BAU20231.1 putative odorant receptor, partial [Reticulitermes speratus]
BAU20230.1 putative odorant receptor 3, partial [Reticulitermes speratus]
BAU20229.1 putative odorant receptor 2 [Reticulitermes speratus]
BAU20228.1 putative odorant receptor 1, partial [Reticulitermes speratus]
KDR17941.1 Gustatory and odorant receptor 24 [Zootermopsis nevadensis]
KDR17509.1 Putative odorant receptor 85f [Zootermopsis nevadensis]
KDR12002.1 Gustatory and odorant receptor 7 [Zootermopsis nevadensis]
KDR11039.1 Odorant receptor Or2 [Zootermopsis nevadensis]
KDR07792.1 Gustatory and odorant receptor 24 [Zootermopsis nevadensis]
KDR07280.1 Gustatory and odorant receptor 24 [Zootermopsis nevadensis]
sp|Q9VPT1.3|GR21A_DROME RecName: Full=Gustatory and odorant receptor 21a
sp|P82984.2|OR65C_DROME RecName: Full=Putative odorant receptor 65c
sp|P82983.2|OR65B_DROME RecName: Full=Putative odorant receptor 65b
AAF58667.3 odorant receptor 47b [Drosophila melanogaster]
AAF58834.3 odorant receptor 46a, isoform A [Drosophila melanogaster]
sp|Q9VU27.2|OR69A_DROME RecName: Full=Putative odorant receptor 69a, isoform A
AAF58951.3 odorant receptor 45a [Drosophila melanogaster]
AAF58519.3 odorant receptor 49a [Drosophila melanogaster]
AAF59173.2 odorant receptor 43b [Drosophila melanogaster]
AAM68774.1 odorant receptor 46a, isoform B [Drosophila melanogaster]
AAF57517.2 odorant receptor 56a [Drosophila melanogaster]
AAF57305.2 odorant receptor 42b [Drosophila melanogaster]
AAF57307.2 odorant receptor 42a [Drosophila melanogaster]
sp|Q9VZL7.1|GR63A_DROME RecName: Full=Gustatory and odorant receptor 63a
sp|Q9VNK9.2|OR83C_DROME RecName: Full=Putative odorant receptor 83c
AAF59280.1 odorant receptor 43a [Drosophila melanogaster]
AAF58928.1 odorant receptor 45b [Drosophila melanogaster]
AAF58695.1 odorant receptor 47a [Drosophila melanogaster]
AAF58452.1 odorant receptor 49b [Drosophila melanogaster]
AAF47009.1 odorant receptor 59c [Drosophila melanogaster]
AAF47008.1 odorant receptor 59b [Drosophila melanogaster]
AAF47004.1 odorant receptor 59a [Drosophila melanogaster]
sp|Q9VAW0.3|OR98B_DROME RecName: Full=Putative odorant receptor 98b
sp|Q8IRZ5.1|OR19B_DROME RecName: Full=Putative odorant receptor 19b
sp|P81924.3|OR85E_DROME RecName: Full=Putative odorant receptor 85e
sp|Q9VUK5.4|OR71A_DROME RecName: Full=Putative odorant receptor 71a
sp|Q9VDM1.3|OR92A_DROME RecName: Full=Putative odorant receptor 92a
sp|P82985.1|OR69B_DROME RecName: Full=Putative odorant receptor 69a, isoform B
sp|Q9W1P7.1|OR59C_DROME RecName: Full=Putative odorant receptor 59c
sp|Q9VHQ2.1|OR85D_DROME RecName: Full=Putative odorant receptor 85d
NP_524540.4 odorant receptor 98b, partial [Drosophila melanogaster]
NP_001262374.1 odorant receptor 85e, partial [Drosophila melanogaster]
NP_001246763.1 odorant receptor 71a, isoform D [Drosophila melanogaster]
NP_001163331.1 odorant receptor 63a, isoform B [Drosophila melanogaster]
NP_523470.3 odorant receptor 24a [Drosophila melanogaster]
NP_001097687.1 odorant receptor co-receptor, isoform B [Drosophila melanogaster]
NP_729163.2 odorant receptor 65c [Drosophila melanogaster]
NP_729162.3 odorant receptor 65b [Drosophila melanogaster]
NP_996070.1 odorant receptor 69a, isoform A [Drosophila melanogaster]
NP_996069.1 odorant receptor 69a, isoform B [Drosophila melanogaster]
NP_995794.1 odorant receptor 46a, isoform A [Drosophila melanogaster]
NP_995793.1 odorant receptor 46a, isoform B [Drosophila melanogaster]
NP_648390.2 odorant receptor 67d [Drosophila melanogaster]
NP_523690.3 odorant receptor 47b [Drosophila melanogaster]
NP_523458.3 odorant receptor 23a [Drosophila melanogaster]
NP_523711.3 odorant receptor 49a [Drosophila melanogaster]
NP_523666.3 odorant receptor 45a [Drosophila melanogaster]
NP_524078.2 odorant receptor 71a, isoform B [Drosophila melanogaster]
NP_524018.2 odorant receptor 67c [Drosophila melanogaster]
NP_524007.2 odorant receptor 67b [Drosophila melanogaster]
NP_524005.2 odorant receptor 67a [Drosophila melanogaster]
NP_729161.1 odorant receptor 65a [Drosophila melanogaster]
NP_523895.2 odorant receptor 63a, isoform A [Drosophila melanogaster]
NP_523796.2 odorant receptor 56a [Drosophila melanogaster]
NP_524536.2 odorant receptor 98a [Drosophila melanogaster]
NP_524414.2 odorant receptor 92a [Drosophila melanogaster]
NP_524348.2 odorant receptor 88a [Drosophila melanogaster]
NP_524280.2 odorant receptor 85c [Drosophila melanogaster]
NP_524279.2 odorant receptor 85b [Drosophila melanogaster]
NP_524244.2 odorant receptor 83c [Drosophila melanogaster]
NP_524235.2 odorant receptor co-receptor, isoform A [Drosophila melanogaster]
NP_524234.2 odorant receptor 83a [Drosophila melanogaster]
NP_730794.1 odorant receptor 82a [Drosophila melanogaster]
NP_525013.2 odorant receptor 19a [Drosophila melanogaster]
NP_728315.1 odorant receptor 19b [Drosophila melanogaster]
NP_523359.2 odorant receptor 13a [Drosophila melanogaster]
NP_525029.2 odorant receptor 1a [Drosophila melanogaster]
NP_523647.2 odorant receptor 43a [Drosophila melanogaster]
NP_723916.1 odorant receptor 35a [Drosophila melanogaster]
NP_523520.2 odorant receptor 30a [Drosophila melanogaster]
NP_523454.2 odorant receptor 22c [Drosophila melanogaster]
NP_523656.2 odorant receptor 43b [Drosophila melanogaster]
NP_523624.2 odorant receptor 42b [Drosophila melanogaster]
NP_523622.2 odorant receptor 42a [Drosophila melanogaster]
NP_524289.1 odorant receptor 85f [Drosophila melanogaster]
NP_524281.1 odorant receptor 85d [Drosophila melanogaster]
NP_524123.1 odorant receptor 74a [Drosophila melanogaster]
NP_523721.1 odorant receptor 49b [Drosophila melanogaster]
NP_523667.1 odorant receptor 45b [Drosophila melanogaster]
NP_511122.1 odorant receptor 10a [Drosophila melanogaster]
NP_511107.1 odorant receptor 9a [Drosophila melanogaster]
NP_525046.1 odorant receptor 2a [Drosophila melanogaster]
NP_524456.1 odorant receptor 94b [Drosophila melanogaster]
NP_524455.1 odorant receptor 94a [Drosophila melanogaster]
NP_524277.1 odorant receptor 85a [Drosophila melanogaster]
NP_523689.1 odorant receptor 47a [Drosophila melanogaster]
NP_523823.1 odorant receptor 59c [Drosophila melanogaster]
NP_523822.1 odorant receptor 59b [Drosophila melanogaster]
NP_523821.1 odorant receptor 59a [Drosophila melanogaster]
NP_523555.1 odorant receptor 33c [Drosophila melanogaster]
NP_523554.1 odorant receptor 33b [Drosophila melanogaster]
NP_523553.1 odorant receptor 33a [Drosophila melanogaster]
NP_523453.1 odorant receptor 22a [Drosophila melanogaster]
NP_511081.1 odorant receptor 7a [Drosophila melanogaster]
NP_477425.1 odorant receptor 22b [Drosophila melanogaster]
AAF56788.4 odorant receptor 98b, partial [Drosophila melanogaster]
AGB95756.1 odorant receptor 85e, partial [Drosophila melanogaster]
AFH04434.1 odorant receptor 71a, isoform D [Drosophila melanogaster]
ACZ94603.1 odorant receptor 63a, isoform B [Drosophila melanogaster]
AAF51040.3 odorant receptor 24a [Drosophila melanogaster]
ABW08603.1 odorant receptor co-receptor, isoform B [Drosophila melanogaster]
AAN12093.2 odorant receptor 65c [Drosophila melanogaster]
AAN12092.3 odorant receptor 65b [Drosophila melanogaster]
AAF50161.3 odorant receptor 67d [Drosophila melanogaster]
AAF49864.3 odorant receptor 69a, isoform A [Drosophila melanogaster]
AAF51230.3 odorant receptor 23a [Drosophila melanogaster]
AAF56753.2 odorant receptor 98a [Drosophila melanogaster]
AAF55769.2 odorant receptor 92a [Drosophila melanogaster]
AAF55018.2 odorant receptor 88a [Drosophila melanogaster]
AAF54245.2 odorant receptor 85c [Drosophila melanogaster]
AAF54244.2 odorant receptor 85b [Drosophila melanogaster]
AAN13335.1 odorant receptor 82a [Drosophila melanogaster]
AAF52031.2 odorant receptor co-receptor, isoform A [Drosophila melanogaster]
AAF52033.2 odorant receptor 83a [Drosophila melanogaster]
AAF51921.2 odorant receptor 83c [Drosophila melanogaster]
AAF47697.2 odorant receptor 63a, isoform A [Drosophila melanogaster]
AAN12091.1 odorant receptor 65a [Drosophila melanogaster]
AAF50236.2 odorant receptor 67b [Drosophila melanogaster]
AAF50248.2 odorant receptor 67a [Drosophila melanogaster]
AAF50163.2 odorant receptor 67c [Drosophila melanogaster]
AAN11842.1 odorant receptor 69a, isoform B [Drosophila melanogaster]
AAN11784.1 odorant receptor 71a, isoform B [Drosophila melanogaster]
AAN10901.1 odorant receptor 35a [Drosophila melanogaster]
AAF52748.3 odorant receptor 30a [Drosophila melanogaster]
AAF51309.2 odorant receptor 22c [Drosophila melanogaster]
AAF48549.2 odorant receptor 13a [Drosophila melanogaster]
AAF45495.2 odorant receptor 1a [Drosophila melanogaster]
AAG22450.2 odorant receptor 19a [Drosophila melanogaster]
AAN08991.1 odorant receptor 19b [Drosophila melanogaster]
AAF56077.1 odorant receptor 94b [Drosophila melanogaster]
AAF56076.1 odorant receptor 94a [Drosophila melanogaster]
AAF54368.1 odorant receptor 85f [Drosophila melanogaster]
AAF54249.1 odorant receptor 85d [Drosophila melanogaster]
AAF54225.1 odorant receptor 85a [Drosophila melanogaster]
AAF53133.1 odorant receptor 33c [Drosophila melanogaster]
AAF53132.1 odorant receptor 33b [Drosophila melanogaster]
AAF53131.1 odorant receptor 33a [Drosophila melanogaster]
AAF51364.1 odorant receptor 22a [Drosophila melanogaster]
AAF51363.1 odorant receptor 22b [Drosophila melanogaster]
AAF49358.1 odorant receptor 74a [Drosophila melanogaster]
AAF48042.1 odorant receptor 10a [Drosophila melanogaster]
AAF46589.1 odorant receptor 9a [Drosophila melanogaster]
AAF46342.1 odorant receptor 7a [Drosophila melanogaster]
AAF45759.1 odorant receptor 2a [Drosophila melanogaster]
AAD26358.2 odorant receptor DOR53, partial [Drosophila melanogaster]
AAD26356.1 odorant receptor DOR62, partial [Drosophila melanogaster]
CBA13613.1 odorant receptor 67d, partial [Drosophila melanogaster]
CBA13612.1 odorant receptor 67d, partial [Drosophila melanogaster]
CBA13611.1 odorant receptor 67d, partial [Drosophila melanogaster]
CBA13610.1 odorant receptor 67d, partial [Drosophila melanogaster]
CBA13609.1 odorant receptor 67d, partial [Drosophila melanogaster]
AEB91955.1 odorant receptor 22a [Drosophila melanogaster]
AEB91954.1 odorant receptor 22a, partial [Drosophila melanogaster]
AEB91953.1 odorant receptor 22a [Drosophila melanogaster]
AEB91952.1 odorant receptor 22a [Drosophila melanogaster]
AEB91951.1 odorant receptor 22a [Drosophila melanogaster]
AEB91950.1 odorant receptor 22a [Drosophila melanogaster]
AEB91949.1 odorant receptor 22a [Drosophila melanogaster]
AEB91948.1 odorant receptor 22a [Drosophila melanogaster]
AEB91947.1 odorant receptor 22a, partial [Drosophila melanogaster]
AEB91946.1 odorant receptor 22a [Drosophila melanogaster]
AEB91945.1 odorant receptor 22a [Drosophila melanogaster]
AEB91944.1 odorant receptor 22a [Drosophila melanogaster]
AEB91943.1 odorant receptor 22a [Drosophila melanogaster]
AEB91942.1 odorant receptor 22a [Drosophila melanogaster]
AEB91941.1 odorant receptor 22a [Drosophila melanogaster]
AEB91940.1 odorant receptor 22a [Drosophila melanogaster]
AEB91939.1 odorant receptor 22a [Drosophila melanogaster]
AEB91938.1 odorant receptor 22a [Drosophila melanogaster]
AEB91937.1 odorant receptor 22a [Drosophila melanogaster]
AEB91936.1 odorant receptor 22a [Drosophila melanogaster]
AEB91935.1 odorant receptor 22a [Drosophila melanogaster]
AEB91934.1 odorant receptor 22a, partial [Drosophila melanogaster]
AEB91933.1 odorant receptor 22a [Drosophila melanogaster]
AEB91932.1 odorant receptor 47a [Drosophila melanogaster]
AEB91931.1 odorant receptor 47a [Drosophila melanogaster]
AEB91930.1 odorant receptor 47a [Drosophila melanogaster]
AEB91929.1 odorant receptor 47a [Drosophila melanogaster]
AEB91928.1 odorant receptor 47a [Drosophila melanogaster]
AEB91927.1 odorant receptor 47a [Drosophila melanogaster]
AEB91926.1 truncated odorant receptor 47a [Drosophila melanogaster]
AEB91925.1 odorant receptor 47a [Drosophila melanogaster]
AEB91924.1 odorant receptor 47a [Drosophila melanogaster]
AEB91923.1 odorant receptor 47a [Drosophila melanogaster]
AEB91922.1 odorant receptor 47a [Drosophila melanogaster]
AEB91921.1 odorant receptor 47a [Drosophila melanogaster]
AEB91920.1 truncated odorant receptor 47a [Drosophila melanogaster]
AEB91919.1 odorant receptor 47a [Drosophila melanogaster]
AEB91918.1 odorant receptor 47a [Drosophila melanogaster]
AEB91917.1 odorant receptor 47a [Drosophila melanogaster]
AEB91916.1 odorant receptor 47a [Drosophila melanogaster]
AEB91915.1 odorant receptor 47a [Drosophila melanogaster]
AEB91914.1 odorant receptor 47a [Drosophila melanogaster]
AEB91913.1 odorant receptor 47a, partial [Drosophila melanogaster]
AEB91912.1 odorant receptor 47a [Drosophila melanogaster]
AEB91911.1 odorant receptor 47a [Drosophila melanogaster]
AEB91910.1 odorant receptor 47a [Drosophila melanogaster]
AEB91909.1 odorant receptor 47a [Drosophila melanogaster]
AEB91908.1 odorant receptor 47a [Drosophila melanogaster]
AEB91907.1 odorant receptor 47a [Drosophila melanogaster]
AEB91906.1 odorant receptor 47a [Drosophila melanogaster]
AEB91905.1 odorant receptor 47a [Drosophila melanogaster]
AEB91904.1 odorant receptor 47a [Drosophila melanogaster]
AEB91903.1 odorant receptor 47a [Drosophila melanogaster]
AEB91902.1 odorant receptor 47a [Drosophila melanogaster]
AEB91901.1 odorant receptor 47a [Drosophila melanogaster]
AEB91900.1 odorant receptor 47a [Drosophila melanogaster]
AEB91899.1 odorant receptor 47a [Drosophila melanogaster]
AEB91898.1 odorant receptor 47a [Drosophila melanogaster]
AEB91897.1 odorant receptor 47a [Drosophila melanogaster]
AEB91896.1 odorant receptor 22b, partial [Drosophila melanogaster]
AEB91895.1 odorant receptor 22b, partial [Drosophila melanogaster]
AEB91894.1 odorant receptor 22b, partial [Drosophila melanogaster]
AEB91893.1 odorant receptor 22b, partial [Drosophila melanogaster]
AEB91892.1 odorant receptor 22b, partial [Drosophila melanogaster]
AEB91891.1 odorant receptor 22b [Drosophila melanogaster]
AEB91890.1 odorant receptor 22b [Drosophila melanogaster]
AEB91889.1 odorant receptor 22b, partial [Drosophila melanogaster]
AEB91888.1 odorant receptor 22b [Drosophila melanogaster]
AEB91887.1 odorant receptor 22b [Drosophila melanogaster]
AEB91886.1 odorant receptor 22b [Drosophila melanogaster]
AEB91885.1 odorant receptor 22b [Drosophila melanogaster]
AEB91884.1 odorant receptor 22b, partial [Drosophila melanogaster]
AEB91883.1 odorant receptor 22b [Drosophila melanogaster]
AEB91882.1 odorant receptor 22b [Drosophila melanogaster]
AEB91881.1 odorant receptor 22b [Drosophila melanogaster]
AEB91880.1 odorant receptor 22b [Drosophila melanogaster]
AEB91879.1 odorant receptor 22b [Drosophila melanogaster]
AEB91878.1 odorant receptor 22b [Drosophila melanogaster]
AEB91877.1 odorant receptor 22b [Drosophila melanogaster]
AEB91876.1 odorant receptor 22b [Drosophila melanogaster]
AEB91875.1 odorant receptor 22b [Drosophila melanogaster]
AEB91874.1 odorant receptor 22b [Drosophila melanogaster]
AEB91873.1 odorant receptor 22b, partial [Drosophila melanogaster]
AEB91872.1 odorant receptor 22 [Drosophila melanogaster]
AEB91871.1 odorant receptor 22 [Drosophila melanogaster]
AEB91870.1 odorant receptor 22 [Drosophila melanogaster]
AEB91869.1 odorant receptor 22 [Drosophila melanogaster]
AEB91868.1 odorant receptor 22 [Drosophila melanogaster]
AEB91867.1 odorant receptor 22 [Drosophila melanogaster]
AEB91866.1 odorant receptor 22 [Drosophila melanogaster]
AEB91865.1 odorant receptor 22 [Drosophila melanogaster]
AEB91864.1 odorant receptor 22 [Drosophila melanogaster]
AEB91863.1 odorant receptor 22 [Drosophila melanogaster]
AEB91862.1 odorant receptor 22 [Drosophila melanogaster]
AEB91861.1 odorant receptor 22 [Drosophila melanogaster]
AEB91860.1 odorant receptor 22 [Drosophila melanogaster]
AEB91859.1 odorant receptor 22 [Drosophila melanogaster]
AEB91858.1 odorant receptor 22 [Drosophila melanogaster]
AEB91857.1 odorant receptor 35a [Drosophila melanogaster]
AEB91856.1 odorant receptor 35a [Drosophila melanogaster]
AEB91855.1 odorant receptor 35a [Drosophila melanogaster]
AEB91854.1 odorant receptor 35a [Drosophila melanogaster]
AEB91853.1 odorant receptor 35a [Drosophila melanogaster]
AEB91852.1 odorant receptor 35a [Drosophila melanogaster]
AEB91851.1 odorant receptor 35a [Drosophila melanogaster]
AEB91850.1 odorant receptor 35a [Drosophila melanogaster]
AEB91849.1 odorant receptor 35a [Drosophila melanogaster]
AEB91848.1 odorant receptor 35a [Drosophila melanogaster]
AEB91847.1 odorant receptor 35a [Drosophila melanogaster]
AEB91846.1 odorant receptor 35a [Drosophila melanogaster]
AEB91845.1 odorant receptor 35a [Drosophila melanogaster]
AEB91844.1 odorant receptor 35a [Drosophila melanogaster]
AEB91843.1 odorant receptor 35a [Drosophila melanogaster]
AEB91842.1 odorant receptor 35a [Drosophila melanogaster]
AEB91841.1 odorant receptor 35a [Drosophila melanogaster]
AEB91840.1 odorant receptor 35a [Drosophila melanogaster]
AEB91839.1 odorant receptor 35a [Drosophila melanogaster]
AEB91838.1 truncated odorant receptor 35a [Drosophila melanogaster]
AEB91837.1 odorant receptor 35a [Drosophila melanogaster]
AEB91836.1 odorant receptor 35a [Drosophila melanogaster]
AEB91835.1 odorant receptor 35a [Drosophila melanogaster]
AEB91834.1 odorant receptor 35a [Drosophila melanogaster]
AEB91833.1 odorant receptor 35a [Drosophila melanogaster]
AEB91832.1 odorant receptor 35a [Drosophila melanogaster]
AEB91831.1 odorant receptor 35a [Drosophila melanogaster]
AEB91830.1 odorant receptor 35a [Drosophila melanogaster]
AEB91829.1 odorant receptor 35a [Drosophila melanogaster]
AEB91828.1 odorant receptor 35a [Drosophila melanogaster]
AEB91827.1 odorant receptor 35a [Drosophila melanogaster]
AEB91826.1 odorant receptor 35a [Drosophila melanogaster]
AEB91825.1 odorant receptor 35a [Drosophila melanogaster]
AEB91824.1 odorant receptor 35a [Drosophila melanogaster]
AEB91823.1 odorant receptor 35a [Drosophila melanogaster]
AEB91822.1 odorant receptor 35a [Drosophila melanogaster]
AEB91821.1 odorant receptor 35a [Drosophila melanogaster]
CBW30775.1 odorant receptor [Drosophila melanogaster]
CBW30774.1 odorant receptor [Drosophila melanogaster]
CBW30773.1 odorant receptor [Drosophila melanogaster]
CBW30772.1 odorant receptor [Drosophila melanogaster]
CBW30771.1 odorant receptor [Drosophila melanogaster]
CBW30770.1 odorant receptor [Drosophila melanogaster]
CBW30769.1 odorant receptor [Drosophila melanogaster]
CBW30768.1 odorant receptor [Drosophila melanogaster]
CBW30767.1 odorant receptor [Drosophila melanogaster]
CBW30766.1 odorant receptor [Drosophila melanogaster]
CBW30765.1 odorant receptor [Drosophila melanogaster]
CBW30764.1 odorant receptor [Drosophila melanogaster]
CBW30745.1 odorant receptor [Drosophila melanogaster]
CBW30744.1 odorant receptor [Drosophila melanogaster]
CBW30743.1 odorant receptor [Drosophila melanogaster]
CBW30742.1 odorant receptor [Drosophila melanogaster]
CBW30741.1 odorant receptor [Drosophila melanogaster]
CBW30740.1 odorant receptor [Drosophila melanogaster]
CBW30739.1 odorant receptor [Drosophila melanogaster]
CBW30738.1 odorant receptor [Drosophila melanogaster]
CBW30737.1 odorant receptor [Drosophila melanogaster]
CBW30736.1 odorant receptor [Drosophila melanogaster]
CBW30735.1 odorant receptor [Drosophila melanogaster]
CBW30734.1 odorant receptor [Drosophila melanogaster]
CBW30733.1 odorant receptor [Drosophila melanogaster]
CBW30730.1 odorant receptor [Drosophila melanogaster]
CBW30729.1 odorant receptor [Drosophila melanogaster]
CBW30728.1 odorant receptor [Drosophila melanogaster]
CBW30727.1 odorant receptor [Drosophila melanogaster]
CBW30726.1 odorant receptor [Drosophila melanogaster]
CBW30725.1 odorant receptor [Drosophila melanogaster]
CBW30724.1 odorant receptor [Drosophila melanogaster]
CBW30723.1 odorant receptor [Drosophila melanogaster]
CBW30722.1 odorant receptor [Drosophila melanogaster]
CBW30721.1 odorant receptor [Drosophila melanogaster]
CBW30720.1 odorant receptor [Drosophila melanogaster]
CBW30719.1 odorant receptor [Drosophila melanogaster]
CBW30718.1 odorant receptor [Drosophila melanogaster]
CBW30699.1 odorant receptor [Drosophila melanogaster]
CBW30698.1 odorant receptor [Drosophila melanogaster]
CBW30697.1 odorant receptor [Drosophila melanogaster]
CBW30696.1 odorant receptor [Drosophila melanogaster]
CBW30695.1 odorant receptor [Drosophila melanogaster]
CBW30694.1 odorant receptor [Drosophila melanogaster]
CBW30693.1 odorant receptor [Drosophila melanogaster]
CBW30692.1 odorant receptor [Drosophila melanogaster]
CBW30691.1 odorant receptor [Drosophila melanogaster]
CBW30690.1 odorant receptor [Drosophila melanogaster]
CBW30689.1 odorant receptor [Drosophila melanogaster]
CBW30688.1 odorant receptor [Drosophila melanogaster]
CBW30647.1 odorant receptor [Drosophila melanogaster]
CBW30646.1 odorant receptor [Drosophila melanogaster]
CBW30645.1 odorant receptor [Drosophila melanogaster]
CBW30644.1 odorant receptor [Drosophila melanogaster]
CBW30643.1 odorant receptor [Drosophila melanogaster]
CBW30642.1 odorant receptor [Drosophila melanogaster]
CBW30641.1 odorant receptor [Drosophila melanogaster]
CBW30639.1 odorant receptor [Drosophila melanogaster]
CBW30638.1 odorant receptor [Drosophila melanogaster]
CBW30637.1 odorant receptor [Drosophila melanogaster]
CBW30636.1 odorant receptor [Drosophila melanogaster]
CBW30635.1 odorant receptor [Drosophila melanogaster]
CBW30633.1 odorant receptor [Drosophila melanogaster]
CBW30632.1 odorant receptor [Drosophila melanogaster]
CBW30631.1 odorant receptor [Drosophila melanogaster]
CBW30630.1 odorant receptor [Drosophila melanogaster]
CBW30629.1 odorant receptor [Drosophila melanogaster]
CBW30628.1 odorant receptor [Drosophila melanogaster]
CBW30627.1 odorant receptor [Drosophila melanogaster]
CBW30626.1 odorant receptor [Drosophila melanogaster]
CBW30625.1 odorant receptor [Drosophila melanogaster]
CBW30624.1 odorant receptor [Drosophila melanogaster]
CBW30623.1 odorant receptor [Drosophila melanogaster]
CBW30622.1 odorant receptor [Drosophila melanogaster]
CBW30621.1 odorant receptor [Drosophila melanogaster]
CBW30619.1 odorant receptor [Drosophila melanogaster]
CBW30618.1 odorant receptor [Drosophila melanogaster]
CBW30617.1 odorant receptor [Drosophila melanogaster]
CBW30616.1 odorant receptor [Drosophila melanogaster]
CBW30615.1 odorant receptor [Drosophila melanogaster]
CBW30614.1 odorant receptor [Drosophila melanogaster]
CBW30613.1 odorant receptor [Drosophila melanogaster]
CBW30612.1 odorant receptor [Drosophila melanogaster]
CBW30611.1 odorant receptor [Drosophila melanogaster]
CBW30610.1 odorant receptor [Drosophila melanogaster]
CBW30609.1 odorant receptor [Drosophila melanogaster]
CBW30608.1 odorant receptor [Drosophila melanogaster]
CBW30607.1 odorant receptor [Drosophila melanogaster]
CBW30606.1 odorant receptor [Drosophila melanogaster]
CBW30604.1 odorant receptor [Drosophila melanogaster]
CBW30603.1 odorant receptor [Drosophila melanogaster]
CBW30602.1 odorant receptor [Drosophila melanogaster]
CBW30601.1 odorant receptor [Drosophila melanogaster]
CBW30600.1 odorant receptor [Drosophila melanogaster]
CBW30599.1 odorant receptor [Drosophila melanogaster]
CBW30598.1 odorant receptor [Drosophila melanogaster]
CBW30597.1 odorant receptor [Drosophila melanogaster]
CBW30596.1 odorant receptor [Drosophila melanogaster]
CBW30595.1 odorant receptor [Drosophila melanogaster]
CBW30594.1 odorant receptor [Drosophila melanogaster]
CBW30593.1 odorant receptor [Drosophila melanogaster]
ADK48664.1 odorant receptor 67b [Drosophila melanogaster]
ADK48663.1 odorant receptor 67b [Drosophila melanogaster]
ADK48662.1 odorant receptor 67b [Drosophila melanogaster]
ADK48661.1 odorant receptor 67b [Drosophila melanogaster]
ADK48660.1 odorant receptor 67b [Drosophila melanogaster]
ADK48659.1 odorant receptor 67b [Drosophila melanogaster]
ADK48658.1 odorant receptor 67b [Drosophila melanogaster]
ADK48657.1 odorant receptor 67b [Drosophila melanogaster]
ADK48656.1 odorant receptor 67b [Drosophila melanogaster]
ADK48655.1 odorant receptor 67b [Drosophila melanogaster]
ADK48654.1 odorant receptor 67b [Drosophila melanogaster]
ADK48653.1 odorant receptor 67b [Drosophila melanogaster]
ADK48652.1 odorant receptor 67b [Drosophila melanogaster]
ADK48651.1 odorant receptor 67b [Drosophila melanogaster]
ADK48650.1 odorant receptor 67b [Drosophila melanogaster]
ADK48649.1 odorant receptor 67b [Drosophila melanogaster]
ADK48648.1 odorant receptor 67b [Drosophila melanogaster]
ADK48647.1 odorant receptor 67b [Drosophila melanogaster]
ADK48646.1 odorant receptor 67b [Drosophila melanogaster]
ADK48645.1 odorant receptor 67b [Drosophila melanogaster]
ADK48644.1 odorant receptor 67b [Drosophila melanogaster]
ADK48643.1 odorant receptor 67b [Drosophila melanogaster]
ADK48642.1 odorant receptor 67b [Drosophila melanogaster]
ADK48641.1 odorant receptor 67b [Drosophila melanogaster]
ADK48640.1 odorant receptor 67b [Drosophila melanogaster]
ADK48639.1 odorant receptor 67b [Drosophila melanogaster]
ADK48638.1 odorant receptor 67b [Drosophila melanogaster]
ADK48637.1 odorant receptor 67b [Drosophila melanogaster]
ADK48636.1 odorant receptor 67b [Drosophila melanogaster]
ADK48635.1 odorant receptor 67b [Drosophila melanogaster]
ADK48634.1 odorant receptor 67b [Drosophila melanogaster]
ADK48633.1 odorant receptor 67b [Drosophila melanogaster]
ADK48632.1 odorant receptor 67b [Drosophila melanogaster]
ADK48631.1 odorant receptor 67b [Drosophila melanogaster]
ADK48630.1 odorant receptor 67b [Drosophila melanogaster]
ADK48629.1 odorant receptor 67b [Drosophila melanogaster]
ADK48628.1 odorant receptor 67b [Drosophila melanogaster]
ADK48627.1 odorant receptor 67b [Drosophila melanogaster]
ADK48626.1 odorant receptor 67b [Drosophila melanogaster]
ADK48625.1 odorant receptor 67b [Drosophila melanogaster]
ADK48624.1 odorant receptor 67b [Drosophila melanogaster]
ADK48623.1 odorant receptor 67b [Drosophila melanogaster]
ADK48622.1 odorant receptor 67b [Drosophila melanogaster]
ADK48621.1 odorant receptor 67b [Drosophila melanogaster]
ADK48620.1 odorant receptor 67b [Drosophila melanogaster]
ADK48619.1 odorant receptor 67b [Drosophila melanogaster]
ADK48618.1 odorant receptor 67b [Drosophila melanogaster]
ADK48617.1 odorant receptor 67b [Drosophila melanogaster]
ADK48616.1 odorant receptor 67b [Drosophila melanogaster]
ADK48615.1 odorant receptor 67b [Drosophila melanogaster]
ADK48614.1 odorant receptor 67b [Drosophila melanogaster]
ADK48613.1 odorant receptor 67b [Drosophila melanogaster]
ADK48612.1 odorant receptor 67b [Drosophila melanogaster]
ADK48611.1 odorant receptor 67b [Drosophila melanogaster]
ADK48610.1 odorant receptor 67b [Drosophila melanogaster]
ADK48609.1 odorant receptor 67b [Drosophila melanogaster]
ADK48608.1 odorant receptor 67b [Drosophila melanogaster]
ADK48607.1 odorant receptor 67b [Drosophila melanogaster]
ADK48606.1 odorant receptor 67b [Drosophila melanogaster]
ADK48605.1 odorant receptor 67b [Drosophila melanogaster]
ADK48604.1 odorant receptor 67b [Drosophila melanogaster]
ADK48603.1 odorant receptor 67b [Drosophila melanogaster]
ADK48602.1 odorant receptor 67b [Drosophila melanogaster]
ADK48601.1 odorant receptor 67b [Drosophila melanogaster]
ADK48600.1 odorant receptor 67b [Drosophila melanogaster]
ADK48599.1 odorant receptor 67b [Drosophila melanogaster]
ADK48598.1 odorant receptor 67b [Drosophila melanogaster]
ADK48597.1 odorant receptor 67b [Drosophila melanogaster]
ADK48596.1 odorant receptor 67b [Drosophila melanogaster]
ADK48595.1 odorant receptor 67b [Drosophila melanogaster]
ADK48594.1 odorant receptor 67b [Drosophila melanogaster]
ADK48593.1 odorant receptor 67b [Drosophila melanogaster]
ADK48592.1 odorant receptor 67b [Drosophila melanogaster]
ADK48591.1 odorant receptor 67b [Drosophila melanogaster]
ADK48590.1 odorant receptor 67b [Drosophila melanogaster]
ADK48589.1 odorant receptor 67b [Drosophila melanogaster]
ADK48588.1 odorant receptor 67b [Drosophila melanogaster]
ADK48587.1 odorant receptor 67b [Drosophila melanogaster]
ADK48586.1 odorant receptor 67b [Drosophila melanogaster]
ADK48585.1 odorant receptor 67b [Drosophila melanogaster]
ADK48584.1 odorant receptor 67b [Drosophila melanogaster]
ADK48583.1 odorant receptor 67b [Drosophila melanogaster]
ADK48582.1 odorant receptor 67b [Drosophila melanogaster]
ADK48581.1 odorant receptor 67b [Drosophila melanogaster]
ADK48580.1 odorant receptor 67b [Drosophila melanogaster]
ADK48579.1 odorant receptor 67b [Drosophila melanogaster]
ADK48578.1 odorant receptor 67b [Drosophila melanogaster]
ADK48577.1 odorant receptor 67b [Drosophila melanogaster]
ADK48576.1 odorant receptor 67b [Drosophila melanogaster]
ADK48575.1 odorant receptor 67b [Drosophila melanogaster]
ADK48574.1 odorant receptor 67b [Drosophila melanogaster]
ADK48573.1 odorant receptor 67b [Drosophila melanogaster]
ADK48572.1 odorant receptor 67b [Drosophila melanogaster]
ADK48571.1 odorant receptor 67b [Drosophila melanogaster]
ADK48570.1 odorant receptor 67b [Drosophila melanogaster]
ADK48569.1 odorant receptor 67b [Drosophila melanogaster]
ADK48568.1 odorant receptor 67b [Drosophila melanogaster]
ADK48567.1 odorant receptor 67b [Drosophila melanogaster]
ADK48566.1 odorant receptor 67b [Drosophila melanogaster]
ADK48565.1 odorant receptor 67b [Drosophila melanogaster]
ADK48564.1 odorant receptor 67b [Drosophila melanogaster]
ADK48563.1 odorant receptor 67b [Drosophila melanogaster]
ADK48562.1 odorant receptor 67b [Drosophila melanogaster]
ADK48561.1 odorant receptor 67b [Drosophila melanogaster]
ADK48560.1 odorant receptor 67b [Drosophila melanogaster]
ADK48559.1 odorant receptor 67b [Drosophila melanogaster]
ADK48558.1 odorant receptor 67b [Drosophila melanogaster]
ADK48557.1 odorant receptor 67b [Drosophila melanogaster]
ADK48556.1 odorant receptor 67b [Drosophila melanogaster]
ADK48555.1 odorant receptor 67b [Drosophila melanogaster]
ADK48554.1 odorant receptor 67b [Drosophila melanogaster]
ADK48553.1 odorant receptor 67b [Drosophila melanogaster]
ADK48552.1 odorant receptor 67b [Drosophila melanogaster]
ADK48551.1 odorant receptor 67b [Drosophila melanogaster]
ADK48550.1 odorant receptor 67b [Drosophila melanogaster]
ADK48549.1 odorant receptor 67b [Drosophila melanogaster]
ADK48548.1 odorant receptor 67b [Drosophila melanogaster]
ADK48547.1 odorant receptor 67b [Drosophila melanogaster]
ADK48546.1 odorant receptor 67b [Drosophila melanogaster]
ADK48545.1 odorant receptor 67b [Drosophila melanogaster]
ADK48544.1 odorant receptor 67b [Drosophila melanogaster]
ADK48543.1 odorant receptor 67b [Drosophila melanogaster]
ADK48542.1 odorant receptor 67b [Drosophila melanogaster]
ADK48541.1 odorant receptor 67b [Drosophila melanogaster]
ADK48540.1 odorant receptor 67b [Drosophila melanogaster]
ADK48539.1 odorant receptor 67b [Drosophila melanogaster]
ADK48538.1 odorant receptor 67b [Drosophila melanogaster]
ADK48537.1 odorant receptor 67b [Drosophila melanogaster]
ADK48536.1 odorant receptor 67b [Drosophila melanogaster]
ADK48535.1 odorant receptor 67b [Drosophila melanogaster]
ADK48534.1 odorant receptor 67b [Drosophila melanogaster]
ADK48533.1 odorant receptor 67b [Drosophila melanogaster]
ADK48532.1 odorant receptor 67b [Drosophila melanogaster]
ADK48531.1 odorant receptor 67b [Drosophila melanogaster]
ADK48530.1 odorant receptor 67b [Drosophila melanogaster]
ADK48529.1 odorant receptor 67b [Drosophila melanogaster]
ADK48528.1 odorant receptor 67b [Drosophila melanogaster]
ADK48527.1 odorant receptor 67b [Drosophila melanogaster]
ADK48526.1 odorant receptor 67b [Drosophila melanogaster]
ADK48525.1 odorant receptor 67b [Drosophila melanogaster]
ADK48524.1 odorant receptor 67b [Drosophila melanogaster]
ADK48523.1 odorant receptor 67b [Drosophila melanogaster]
ADK48522.1 odorant receptor 67b [Drosophila melanogaster]
ADK48521.1 odorant receptor 67b [Drosophila melanogaster]
ADK48520.1 odorant receptor 67b [Drosophila melanogaster]
ADK48519.1 odorant receptor 67b [Drosophila melanogaster]
ADK48518.1 odorant receptor 67b [Drosophila melanogaster]
ADK48517.1 odorant receptor 67b [Drosophila melanogaster]
ADK48516.1 odorant receptor 67b [Drosophila melanogaster]
ADK48515.1 odorant receptor 43a [Drosophila melanogaster]
ADK48514.1 odorant receptor 43a [Drosophila melanogaster]
ADK48513.1 odorant receptor 43a [Drosophila melanogaster]
ADK48512.1 odorant receptor 43a [Drosophila melanogaster]
ADK48511.1 odorant receptor 43a [Drosophila melanogaster]
ADK48510.1 odorant receptor 43a [Drosophila melanogaster]
ADK48509.1 odorant receptor 43a [Drosophila melanogaster]
ADK48508.1 odorant receptor 43a [Drosophila melanogaster]
ADK48507.1 odorant receptor 43a [Drosophila melanogaster]
ADK48506.1 odorant receptor 43a [Drosophila melanogaster]
ADK48505.1 odorant receptor 43a [Drosophila melanogaster]
ADK48504.1 odorant receptor 43a [Drosophila melanogaster]
ADK48503.1 odorant receptor 43a [Drosophila melanogaster]
ADK48502.1 odorant receptor 43a [Drosophila melanogaster]
ADK48501.1 odorant receptor 43a [Drosophila melanogaster]
ADK48500.1 odorant receptor 43a [Drosophila melanogaster]
ADK48499.1 odorant receptor 43a [Drosophila melanogaster]
ADK48498.1 odorant receptor 43a [Drosophila melanogaster]
ADK48497.1 odorant receptor 43a [Drosophila melanogaster]
ADK48496.1 odorant receptor 43a [Drosophila melanogaster]
ADK48495.1 odorant receptor 43a [Drosophila melanogaster]
ADK48494.1 odorant receptor 43a [Drosophila melanogaster]
ADK48493.1 odorant receptor 43a [Drosophila melanogaster]
ADK48492.1 odorant receptor 43a [Drosophila melanogaster]
ADK48491.1 odorant receptor 43a [Drosophila melanogaster]
ADK48490.1 odorant receptor 43a [Drosophila melanogaster]
ADK48489.1 odorant receptor 43a [Drosophila melanogaster]
ADK48488.1 odorant receptor 43a [Drosophila melanogaster]
ADK48487.1 odorant receptor 43a [Drosophila melanogaster]
ADK48486.1 odorant receptor 43a [Drosophila melanogaster]
ADK48485.1 odorant receptor 43a [Drosophila melanogaster]
ADK48484.1 odorant receptor 43a [Drosophila melanogaster]
ADK48483.1 odorant receptor 43a [Drosophila melanogaster]
ADK48482.1 odorant receptor 43a [Drosophila melanogaster]
ADK48481.1 odorant receptor 43a [Drosophila melanogaster]
ADK48480.1 odorant receptor 43a [Drosophila melanogaster]
ADK48479.1 odorant receptor 43a [Drosophila melanogaster]
ADK48478.1 odorant receptor 43a [Drosophila melanogaster]
ADK48477.1 odorant receptor 43a [Drosophila melanogaster]
ADK48476.1 odorant receptor 43a [Drosophila melanogaster]
ADK48475.1 odorant receptor 43a [Drosophila melanogaster]
ADK48474.1 odorant receptor 43a [Drosophila melanogaster]
ADK48473.1 odorant receptor 43a [Drosophila melanogaster]
ADK48472.1 odorant receptor 43a [Drosophila melanogaster]
ADK48471.1 odorant receptor 43a [Drosophila melanogaster]
ADK48470.1 odorant receptor 43a [Drosophila melanogaster]
ADK48469.1 odorant receptor 43a [Drosophila melanogaster]
ADK48468.1 odorant receptor 43a [Drosophila melanogaster]
ADK48467.1 odorant receptor 43a [Drosophila melanogaster]
ADK48466.1 odorant receptor 43a [Drosophila melanogaster]
ADK48465.1 odorant receptor 43a [Drosophila melanogaster]
ADK48464.1 odorant receptor 43a [Drosophila melanogaster]
ADK48463.1 odorant receptor 43a [Drosophila melanogaster]
ADK48462.1 odorant receptor 43a [Drosophila melanogaster]
ADK48461.1 odorant receptor 43a [Drosophila melanogaster]
ADK48460.1 odorant receptor 43a [Drosophila melanogaster]
ADK48459.1 odorant receptor 43a [Drosophila melanogaster]
ADK48458.1 odorant receptor 43a [Drosophila melanogaster]
ADK48457.1 odorant receptor 43a [Drosophila melanogaster]
ADK48456.1 odorant receptor 43a [Drosophila melanogaster]
ADK48455.1 odorant receptor 43a [Drosophila melanogaster]
ADK48454.1 odorant receptor 43a [Drosophila melanogaster]
ADK48453.1 odorant receptor 43a [Drosophila melanogaster]
ADK48452.1 odorant receptor 43a [Drosophila melanogaster]
ADK48451.1 odorant receptor 43a [Drosophila melanogaster]
ADK48450.1 odorant receptor 43a [Drosophila melanogaster]
ADK48449.1 odorant receptor 43a [Drosophila melanogaster]
ADK48448.1 odorant receptor 43a [Drosophila melanogaster]
ADK48447.1 odorant receptor 43a [Drosophila melanogaster]
ADK48446.1 odorant receptor 43a [Drosophila melanogaster]
ADK48445.1 odorant receptor 43a [Drosophila melanogaster]
ADK48444.1 odorant receptor 43a [Drosophila melanogaster]
ADK48443.1 odorant receptor 43a [Drosophila melanogaster]
ADK48442.1 odorant receptor 43a [Drosophila melanogaster]
ADK48441.1 odorant receptor 43a [Drosophila melanogaster]
ADK48440.1 odorant receptor 43a [Drosophila melanogaster]
ADK48439.1 odorant receptor 43a [Drosophila melanogaster]
ADK48438.1 odorant receptor 43a [Drosophila melanogaster]
ADK48437.1 odorant receptor 43a [Drosophila melanogaster]
ADK48436.1 odorant receptor 43a [Drosophila melanogaster]
ADK48435.1 odorant receptor 43a [Drosophila melanogaster]
ADK48434.1 odorant receptor 43a [Drosophila melanogaster]
ADK48433.1 odorant receptor 43a [Drosophila melanogaster]
ADK48432.1 odorant receptor 43a [Drosophila melanogaster]
ADK48431.1 odorant receptor 43a [Drosophila melanogaster]
ADK48430.1 odorant receptor 43a [Drosophila melanogaster]
ADK48429.1 odorant receptor 43a [Drosophila melanogaster]
ADK48428.1 odorant receptor 43a [Drosophila melanogaster]
ADK48427.1 odorant receptor 43a [Drosophila melanogaster]
ADK48426.1 odorant receptor 43a [Drosophila melanogaster]
ADK48425.1 odorant receptor 43a [Drosophila melanogaster]
ADK48424.1 odorant receptor 43a [Drosophila melanogaster]
ADK48423.1 odorant receptor 43a [Drosophila melanogaster]
ADK48422.1 odorant receptor 43a [Drosophila melanogaster]
ADK48421.1 odorant receptor 43a [Drosophila melanogaster]
ADK48420.1 odorant receptor 43a [Drosophila melanogaster]
ADK48419.1 odorant receptor 43a [Drosophila melanogaster]
ADK48418.1 odorant receptor 43a [Drosophila melanogaster]
ADK48417.1 odorant receptor 43a [Drosophila melanogaster]
ADK48416.1 odorant receptor 43a [Drosophila melanogaster]
ADK48415.1 odorant receptor 43a [Drosophila melanogaster]
ADK48414.1 odorant receptor 43a [Drosophila melanogaster]
ADK48413.1 odorant receptor 43a [Drosophila melanogaster]
ADK48412.1 odorant receptor 43a [Drosophila melanogaster]
ADK48411.1 odorant receptor 43a [Drosophila melanogaster]
ADK48410.1 odorant receptor 43a [Drosophila melanogaster]
ADK48409.1 odorant receptor 43a [Drosophila melanogaster]
ADK48408.1 odorant receptor 43a [Drosophila melanogaster]
ADK48407.1 odorant receptor 43a [Drosophila melanogaster]
ADK48406.1 odorant receptor 43a [Drosophila melanogaster]
ADK48405.1 odorant receptor 43a [Drosophila melanogaster]
ADK48404.1 odorant receptor 43a [Drosophila melanogaster]
ADK48403.1 odorant receptor 43a [Drosophila melanogaster]
ADK48402.1 odorant receptor 43a [Drosophila melanogaster]
ADK48401.1 odorant receptor 43a [Drosophila melanogaster]
ADK48400.1 odorant receptor 43a [Drosophila melanogaster]
ADK48399.1 odorant receptor 43a [Drosophila melanogaster]
ADK48398.1 odorant receptor 43a [Drosophila melanogaster]
ADK48397.1 odorant receptor 43a [Drosophila melanogaster]
ADK48396.1 odorant receptor 43a [Drosophila melanogaster]
ADK48395.1 odorant receptor 43a [Drosophila melanogaster]
ADK48394.1 odorant receptor 43a [Drosophila melanogaster]
ADK48393.1 odorant receptor 43a [Drosophila melanogaster]
ADK48392.1 odorant receptor 43a [Drosophila melanogaster]
ADK48391.1 odorant receptor 43a [Drosophila melanogaster]
ADK48390.1 odorant receptor 43a [Drosophila melanogaster]
ADK48389.1 odorant receptor 43a [Drosophila melanogaster]
ADK48388.1 odorant receptor 43a [Drosophila melanogaster]
ADK48387.1 odorant receptor 43a [Drosophila melanogaster]
ADK48386.1 odorant receptor 43a [Drosophila melanogaster]
ADK48385.1 odorant receptor 43a [Drosophila melanogaster]
ADK48384.1 odorant receptor 43a [Drosophila melanogaster]
ADK48383.1 odorant receptor 43a [Drosophila melanogaster]
ADK48382.1 odorant receptor 43a [Drosophila melanogaster]
ADK48381.1 odorant receptor 43a [Drosophila melanogaster]
ADK48380.1 odorant receptor 43a [Drosophila melanogaster]
ADK48379.1 odorant receptor 43a [Drosophila melanogaster]
ADK48378.1 odorant receptor 43a [Drosophila melanogaster]
ADK48377.1 odorant receptor 43a [Drosophila melanogaster]
ADK48376.1 odorant receptor 43a [Drosophila melanogaster]
ADK48375.1 odorant receptor 43a [Drosophila melanogaster]
ADK48374.1 odorant receptor 43a [Drosophila melanogaster]
ADK48373.1 odorant receptor 43a [Drosophila melanogaster]
ADK48372.1 odorant receptor 43a [Drosophila melanogaster]
ADK48371.1 odorant receptor 43a [Drosophila melanogaster]
ADK48370.1 odorant receptor 43a [Drosophila melanogaster]
ADK48369.1 odorant receptor 43a [Drosophila melanogaster]
ADK48368.1 odorant receptor 43a [Drosophila melanogaster]
ADK48367.1 odorant receptor 43a [Drosophila melanogaster]
ADK48366.1 odorant receptor 43a [Drosophila melanogaster]
ADK48365.1 odorant receptor 43a [Drosophila melanogaster]
ADK48364.1 odorant receptor 43a [Drosophila melanogaster]
ADK48363.1 odorant receptor 43a [Drosophila melanogaster]
ADK48362.1 odorant receptor 43a [Drosophila melanogaster]
ADK48361.1 odorant receptor 43a [Drosophila melanogaster]
ADK48360.1 odorant receptor 43a [Drosophila melanogaster]
ADK48359.1 odorant receptor 43a [Drosophila melanogaster]
ADK48358.1 odorant receptor 43a [Drosophila melanogaster]
ADK48357.1 odorant receptor 43a [Drosophila melanogaster]
ADK48356.1 odorant receptor 43a [Drosophila melanogaster]
ADK48355.1 odorant receptor 43a [Drosophila melanogaster]
ADK48354.1 odorant receptor 43a [Drosophila melanogaster]
ADK48353.1 odorant receptor 43a [Drosophila melanogaster]
ADK48352.1 odorant receptor 43a [Drosophila melanogaster]
ADK48351.1 odorant receptor 43a [Drosophila melanogaster]
ADK48350.1 odorant receptor 43a [Drosophila melanogaster]
ADK48349.1 odorant receptor 43a [Drosophila melanogaster]
ADK48348.1 odorant receptor 10a [Drosophila melanogaster]
ADK48347.1 odorant receptor 10a [Drosophila melanogaster]
ADK48346.1 odorant receptor 10a [Drosophila melanogaster]
ADK48345.1 odorant receptor 10a [Drosophila melanogaster]
ADK48344.1 odorant receptor 10a [Drosophila melanogaster]
ADK48343.1 odorant receptor 10a [Drosophila melanogaster]
ADK48342.1 odorant receptor 10a [Drosophila melanogaster]
ADK48341.1 odorant receptor 10a [Drosophila melanogaster]
ADK48340.1 odorant receptor 10a [Drosophila melanogaster]
ADK48339.1 odorant receptor 10a [Drosophila melanogaster]
ADK48338.1 odorant receptor 10a [Drosophila melanogaster]
ADK48337.1 odorant receptor 10a [Drosophila melanogaster]
ADK48336.1 odorant receptor 10a [Drosophila melanogaster]
ADK48335.1 odorant receptor 10a [Drosophila melanogaster]
ADK48334.1 odorant receptor 10a [Drosophila melanogaster]
ADK48333.1 odorant receptor 10a [Drosophila melanogaster]
ADK48332.1 odorant receptor 10a [Drosophila melanogaster]
ADK48331.1 odorant receptor 10a [Drosophila melanogaster]
ADK48330.1 odorant receptor 10a [Drosophila melanogaster]
ADK48329.1 odorant receptor 10a [Drosophila melanogaster]
ADK48328.1 odorant receptor 10a [Drosophila melanogaster]
ADK48327.1 odorant receptor 10a [Drosophila melanogaster]
ADK48326.1 odorant receptor 10a [Drosophila melanogaster]
ADK48325.1 odorant receptor 10a [Drosophila melanogaster]
ADK48324.1 odorant receptor 10a [Drosophila melanogaster]
ADK48323.1 odorant receptor 10a [Drosophila melanogaster]
ADK48322.1 odorant receptor 10a [Drosophila melanogaster]
ADK48321.1 odorant receptor 10a [Drosophila melanogaster]
ADK48320.1 odorant receptor 10a [Drosophila melanogaster]
ADK48319.1 odorant receptor 10a [Drosophila melanogaster]
ADK48318.1 odorant receptor 10a [Drosophila melanogaster]
ADK48317.1 odorant receptor 10a [Drosophila melanogaster]
ADK48316.1 odorant receptor 10a [Drosophila melanogaster]
ADK48315.1 odorant receptor 10a [Drosophila melanogaster]
ADK48314.1 odorant receptor 10a [Drosophila melanogaster]
ADK48313.1 odorant receptor 10a [Drosophila melanogaster]
ADK48312.1 odorant receptor 10a [Drosophila melanogaster]
ADK48311.1 odorant receptor 10a [Drosophila melanogaster]
ADK48310.1 odorant receptor 10a [Drosophila melanogaster]
ADK48309.1 odorant receptor 10a [Drosophila melanogaster]
ADK48308.1 odorant receptor 10a [Drosophila melanogaster]
ADK48307.1 odorant receptor 10a [Drosophila melanogaster]
ADK48306.1 odorant receptor 10a [Drosophila melanogaster]
ADK48305.1 odorant receptor 10a [Drosophila melanogaster]
ADK48304.1 odorant receptor 10a [Drosophila melanogaster]
ADK48303.1 odorant receptor 10a [Drosophila melanogaster]
ADK48302.1 odorant receptor 10a [Drosophila melanogaster]
ADK48301.1 odorant receptor 10a [Drosophila melanogaster]
ADK48300.1 odorant receptor 10a [Drosophila melanogaster]
ADK48299.1 odorant receptor 10a [Drosophila melanogaster]
ADK48298.1 odorant receptor 10a [Drosophila melanogaster]
ADK48297.1 odorant receptor 10a [Drosophila melanogaster]
ADK48296.1 odorant receptor 10a [Drosophila melanogaster]
ADK48295.1 odorant receptor 10a [Drosophila melanogaster]
ADK48294.1 odorant receptor 10a [Drosophila melanogaster]
ADK48293.1 odorant receptor 10a [Drosophila melanogaster]
ADK48292.1 odorant receptor 10a [Drosophila melanogaster]
ADK48291.1 odorant receptor 10a [Drosophila melanogaster]
ADK48290.1 odorant receptor 10a [Drosophila melanogaster]
ADK48289.1 odorant receptor 10a [Drosophila melanogaster]
ADK48288.1 odorant receptor 10a [Drosophila melanogaster]
ADK48287.1 odorant receptor 10a [Drosophila melanogaster]
ADK48286.1 odorant receptor 10a [Drosophila melanogaster]
ADK48285.1 odorant receptor 10a [Drosophila melanogaster]
ADK48284.1 odorant receptor 10a [Drosophila melanogaster]
ADK48283.1 odorant receptor 10a [Drosophila melanogaster]
ADK48282.1 odorant receptor 10a [Drosophila melanogaster]
ADK48281.1 odorant receptor 10a [Drosophila melanogaster]
ADK48280.1 odorant receptor 10a [Drosophila melanogaster]
ADK48279.1 odorant receptor 10a [Drosophila melanogaster]
ADK48278.1 odorant receptor 10a [Drosophila melanogaster]
ADK48277.1 odorant receptor 10a [Drosophila melanogaster]
ADK48276.1 odorant receptor 10a [Drosophila melanogaster]
ADK48275.1 odorant receptor 10a [Drosophila melanogaster]
ADK48274.1 odorant receptor 10a [Drosophila melanogaster]
ADK48273.1 odorant receptor 10a [Drosophila melanogaster]
ADK48272.1 odorant receptor 10a [Drosophila melanogaster]
ADK48271.1 odorant receptor 10a [Drosophila melanogaster]
ADK48270.1 odorant receptor 10a [Drosophila melanogaster]
ADK48269.1 odorant receptor 10a [Drosophila melanogaster]
ADK48268.1 odorant receptor 10a [Drosophila melanogaster]
ADK48267.1 odorant receptor 10a [Drosophila melanogaster]
ADK48266.1 odorant receptor 10a [Drosophila melanogaster]
ADK48265.1 odorant receptor 10a [Drosophila melanogaster]
ADK48264.1 odorant receptor 10a [Drosophila melanogaster]
ADK48263.1 odorant receptor 10a [Drosophila melanogaster]
ADK48262.1 odorant receptor 10a [Drosophila melanogaster]
ADK48261.1 odorant receptor 10a [Drosophila melanogaster]
ADK48260.1 odorant receptor 10a [Drosophila melanogaster]
ADK48259.1 odorant receptor 10a [Drosophila melanogaster]
ADK48258.1 odorant receptor 10a [Drosophila melanogaster]
ADK48257.1 odorant receptor 10a [Drosophila melanogaster]
ADK48256.1 odorant receptor 10a [Drosophila melanogaster]
ADK48255.1 odorant receptor 10a [Drosophila melanogaster]
ADK48254.1 odorant receptor 10a [Drosophila melanogaster]
ADK48253.1 odorant receptor 10a [Drosophila melanogaster]
ADK48252.1 odorant receptor 10a [Drosophila melanogaster]
ADK48251.1 odorant receptor 10a [Drosophila melanogaster]
ADK48250.1 odorant receptor 10a [Drosophila melanogaster]
ADK48249.1 odorant receptor 10a [Drosophila melanogaster]
ADK48248.1 odorant receptor 10a [Drosophila melanogaster]
ADK48247.1 odorant receptor 10a [Drosophila melanogaster]
ADK48246.1 odorant receptor 10a [Drosophila melanogaster]
ADK48245.1 odorant receptor 10a [Drosophila melanogaster]
ADK48244.1 odorant receptor 10a [Drosophila melanogaster]
ADK48243.1 odorant receptor 10a [Drosophila melanogaster]
ADK48242.1 odorant receptor 10a [Drosophila melanogaster]
ADK48241.1 odorant receptor 10a [Drosophila melanogaster]
ADK48240.1 odorant receptor 10a [Drosophila melanogaster]
ADK48239.1 odorant receptor 10a [Drosophila melanogaster]
ADK48238.1 odorant receptor 10a [Drosophila melanogaster]
ADK48237.1 odorant receptor 10a [Drosophila melanogaster]
ADK48236.1 odorant receptor 10a [Drosophila melanogaster]
ADK48235.1 odorant receptor 10a [Drosophila melanogaster]
ADK48234.1 odorant receptor 10a [Drosophila melanogaster]
ADK48233.1 odorant receptor 10a [Drosophila melanogaster]
ADK48232.1 odorant receptor 10a [Drosophila melanogaster]
ADK48231.1 odorant receptor 10a [Drosophila melanogaster]
ADK48230.1 odorant receptor 10a [Drosophila melanogaster]
ADK48229.1 odorant receptor 10a [Drosophila melanogaster]
ADK48228.1 odorant receptor 10a [Drosophila melanogaster]
ADK48227.1 odorant receptor 10a [Drosophila melanogaster]
ADK48226.1 odorant receptor 10a [Drosophila melanogaster]
ADK48225.1 odorant receptor 10a [Drosophila melanogaster]
ADK48224.1 odorant receptor 10a [Drosophila melanogaster]
ADK48223.1 odorant receptor 10a [Drosophila melanogaster]
ADK48222.1 odorant receptor 10a [Drosophila melanogaster]
ADK48221.1 odorant receptor 10a [Drosophila melanogaster]
ADK48220.1 odorant receptor 10a [Drosophila melanogaster]
ADK48219.1 odorant receptor 10a [Drosophila melanogaster]
ADK48218.1 odorant receptor 10a [Drosophila melanogaster]
ADK48217.1 odorant receptor 10a [Drosophila melanogaster]
ADK48216.1 odorant receptor 10a [Drosophila melanogaster]
ADK48215.1 odorant receptor 10a [Drosophila melanogaster]
ADK48214.1 odorant receptor 10a [Drosophila melanogaster]
ADK48213.1 odorant receptor 10a [Drosophila melanogaster]
ADK48212.1 odorant receptor 10a [Drosophila melanogaster]
ADK48211.1 odorant receptor 10a [Drosophila melanogaster]
ADK48210.1 odorant receptor 10a [Drosophila melanogaster]
ADK48209.1 odorant receptor 10a [Drosophila melanogaster]
ADK48208.1 odorant receptor 10a [Drosophila melanogaster]
ADK48207.1 odorant receptor 10a [Drosophila melanogaster]
ADK48206.1 odorant receptor 10a [Drosophila melanogaster]
ADK48205.1 odorant receptor 10a [Drosophila melanogaster]
ADK48204.1 odorant receptor 10a [Drosophila melanogaster]
ADK48203.1 odorant receptor 10a [Drosophila melanogaster]
ADK48202.1 odorant receptor 10a [Drosophila melanogaster]
ADK48201.1 odorant receptor 10a [Drosophila melanogaster]
ADK48200.1 odorant receptor 10a [Drosophila melanogaster]
ADK48199.1 odorant receptor 10a [Drosophila melanogaster]
ADK48198.1 odorant receptor 10a [Drosophila melanogaster]
ADK48197.1 odorant receptor 10a [Drosophila melanogaster]
ADK48196.1 odorant receptor 10a [Drosophila melanogaster]
ADK48195.1 odorant receptor 10a [Drosophila melanogaster]
ADK48194.1 odorant receptor 10a [Drosophila melanogaster]
ADK48193.1 odorant receptor 10a [Drosophila melanogaster]
ADK48192.1 odorant receptor 10a [Drosophila melanogaster]
ADK48191.1 odorant receptor 10a [Drosophila melanogaster]
ADK48190.1 odorant receptor 10a [Drosophila melanogaster]
ADK48189.1 odorant receptor 10a [Drosophila melanogaster]
ADK48188.1 odorant receptor 10a [Drosophila melanogaster]
ADK48187.1 odorant receptor 10a [Drosophila melanogaster]
ADK48186.1 odorant receptor 10a [Drosophila melanogaster]
ADK48185.1 odorant receptor 10a [Drosophila melanogaster]
ADK48184.1 odorant receptor 10a [Drosophila melanogaster]
ADK48183.1 odorant receptor 10a [Drosophila melanogaster]
ADK48182.1 odorant receptor 10a [Drosophila melanogaster]
ADK48181.1 odorant receptor 10a [Drosophila melanogaster]
ADK48180.1 odorant receptor 10a [Drosophila melanogaster]
ADK48179.1 odorant receptor 10a [Drosophila melanogaster]
ADK48178.1 odorant receptor 10a [Drosophila melanogaster]
ADK48177.1 odorant receptor 10a [Drosophila melanogaster]
ADK48176.1 odorant receptor 10a [Drosophila melanogaster]
ADK48175.1 odorant receptor 10a [Drosophila melanogaster]
ADK48174.1 odorant receptor 10a [Drosophila melanogaster]
ADK48173.1 odorant receptor 10a [Drosophila melanogaster]
ADK48172.1 odorant receptor 10a [Drosophila melanogaster]
ADK48171.1 odorant receptor 10a [Drosophila melanogaster]
ADK48170.1 odorant receptor 10a [Drosophila melanogaster]
ADK48169.1 odorant receptor 10a [Drosophila melanogaster]
ADK48168.1 odorant receptor 10a [Drosophila melanogaster]
ADK48167.1 odorant receptor 10a [Drosophila melanogaster]
ADK48166.1 odorant receptor 10a [Drosophila melanogaster]
ADK48165.1 odorant receptor 10a [Drosophila melanogaster]
ADK48164.1 odorant receptor 10a [Drosophila melanogaster]
ADK48163.1 odorant receptor 10a [Drosophila melanogaster]
ADK48162.1 odorant receptor 10a [Drosophila melanogaster]
ADK48161.1 odorant receptor 10a [Drosophila melanogaster]
ADK48160.1 odorant receptor 10a [Drosophila melanogaster]
ADK48159.1 odorant receptor 10a [Drosophila melanogaster]
ADK48158.1 odorant receptor 10a [Drosophila melanogaster]
ADK48157.1 odorant receptor 10a [Drosophila melanogaster]
ADK48156.1 odorant receptor 10a [Drosophila melanogaster]
ADK48155.1 odorant receptor 10a [Drosophila melanogaster]
ADK48154.1 odorant receptor 10a [Drosophila melanogaster]
ADK48153.1 odorant receptor 10a [Drosophila melanogaster]
ADK48152.1 odorant receptor 10a [Drosophila melanogaster]
ADK48151.1 odorant receptor 85f [Drosophila melanogaster]
ADK48150.1 odorant receptor 85f [Drosophila melanogaster]
ADK48149.1 odorant receptor 85f [Drosophila melanogaster]
ADK48148.1 odorant receptor 85f [Drosophila melanogaster]
ADK48147.1 odorant receptor 85f [Drosophila melanogaster]
ADK48146.1 odorant receptor 85f [Drosophila melanogaster]
ADK48145.1 odorant receptor 85f [Drosophila melanogaster]
ADK48144.1 odorant receptor 85f [Drosophila melanogaster]
ADK48143.1 odorant receptor 85f [Drosophila melanogaster]
ADK48142.1 odorant receptor 85f [Drosophila melanogaster]
ADK48141.1 odorant receptor 85f [Drosophila melanogaster]
ADK48140.1 odorant receptor 85f [Drosophila melanogaster]
ADK48139.1 odorant receptor 85f [Drosophila melanogaster]
ADK48138.1 odorant receptor 85f [Drosophila melanogaster]
ADK48137.1 odorant receptor 85f [Drosophila melanogaster]
ADK48136.1 odorant receptor 85f [Drosophila melanogaster]
ADK48135.1 odorant receptor 85f [Drosophila melanogaster]
ADK48134.1 odorant receptor 85f [Drosophila melanogaster]
ADK48133.1 odorant receptor 85f [Drosophila melanogaster]
ADK48132.1 odorant receptor 85f [Drosophila melanogaster]
ADK48131.1 odorant receptor 85f [Drosophila melanogaster]
ADK48130.1 odorant receptor 85f [Drosophila melanogaster]
ADK48129.1 odorant receptor 85f [Drosophila melanogaster]
ADK48128.1 odorant receptor 85f [Drosophila melanogaster]
ADK48127.1 odorant receptor 85f [Drosophila melanogaster]
ADK48126.1 odorant receptor 85f [Drosophila melanogaster]
ADK48125.1 odorant receptor 85f [Drosophila melanogaster]
ADK48124.1 odorant receptor 85f [Drosophila melanogaster]
ADK48123.1 odorant receptor 85f [Drosophila melanogaster]
ADK48122.1 odorant receptor 85f [Drosophila melanogaster]
ADK48121.1 odorant receptor 85f [Drosophila melanogaster]
ADK48120.1 odorant receptor 85f [Drosophila melanogaster]
ADK48119.1 odorant receptor 85f [Drosophila melanogaster]
ADK48118.1 odorant receptor 85f [Drosophila melanogaster]
ADK48117.1 odorant receptor 85f [Drosophila melanogaster]
ADK48116.1 odorant receptor 85f [Drosophila melanogaster]
ADK48115.1 odorant receptor 85f [Drosophila melanogaster]
ADK48114.1 odorant receptor 85f [Drosophila melanogaster]
ADK48113.1 odorant receptor 85f [Drosophila melanogaster]
ADK48112.1 odorant receptor 85f [Drosophila melanogaster]
ADK48111.1 odorant receptor 85f [Drosophila melanogaster]
ADK48110.1 odorant receptor 85f [Drosophila melanogaster]
ADK48109.1 odorant receptor 85f [Drosophila melanogaster]
ADK48108.1 odorant receptor 85f [Drosophila melanogaster]
ADK48107.1 odorant receptor 85f [Drosophila melanogaster]
ADK48106.1 odorant receptor 85f [Drosophila melanogaster]
ADK48105.1 odorant receptor 85f [Drosophila melanogaster]
ADK48104.1 odorant receptor 85f [Drosophila melanogaster]
ADK48103.1 odorant receptor 85f [Drosophila melanogaster]
ADK48102.1 odorant receptor 85f [Drosophila melanogaster]
ADK48101.1 odorant receptor 7a [Drosophila melanogaster]
ADK48100.1 odorant receptor 7a [Drosophila melanogaster]
ADK48099.1 odorant receptor 7a [Drosophila melanogaster]
ADK48098.1 odorant receptor 7a [Drosophila melanogaster]
ADK48097.1 odorant receptor 7a [Drosophila melanogaster]
ADK48096.1 odorant receptor 7a [Drosophila melanogaster]
ADK48095.1 odorant receptor 7a [Drosophila melanogaster]
ADK48094.1 odorant receptor 7a [Drosophila melanogaster]
ADK48093.1 odorant receptor 7a [Drosophila melanogaster]
ADK48092.1 odorant receptor 7a [Drosophila melanogaster]
ADK48091.1 odorant receptor 7a [Drosophila melanogaster]
ADK48090.1 odorant receptor 7a [Drosophila melanogaster]
ADK48089.1 odorant receptor 7a [Drosophila melanogaster]
ADK48088.1 odorant receptor 7a [Drosophila melanogaster]
ADK48087.1 odorant receptor 7a [Drosophila melanogaster]
ADK48086.1 odorant receptor 7a [Drosophila melanogaster]
ADK48085.1 odorant receptor 7a [Drosophila melanogaster]
ADK48084.1 odorant receptor 7a [Drosophila melanogaster]
ADK48083.1 odorant receptor 7a [Drosophila melanogaster]
ADK48082.1 odorant receptor 7a [Drosophila melanogaster]
ADK48081.1 odorant receptor 7a [Drosophila melanogaster]
ADK48080.1 odorant receptor 7a [Drosophila melanogaster]
ADK48079.1 odorant receptor 7a [Drosophila melanogaster]
ADK48078.1 odorant receptor 7a [Drosophila melanogaster]
ADK48077.1 odorant receptor 7a [Drosophila melanogaster]
ADK48076.1 odorant receptor 7a [Drosophila melanogaster]
ADK48075.1 odorant receptor 7a [Drosophila melanogaster]
ADK48074.1 odorant receptor 7a [Drosophila melanogaster]
ADK48073.1 odorant receptor 7a [Drosophila melanogaster]
ADK48072.1 odorant receptor 7a [Drosophila melanogaster]
ADK48071.1 odorant receptor 7a [Drosophila melanogaster]
ADK48070.1 odorant receptor 7a [Drosophila melanogaster]
ADK48069.1 odorant receptor 7a [Drosophila melanogaster]
ADK48068.1 odorant receptor 7a [Drosophila melanogaster]
ADK48067.1 odorant receptor 7a [Drosophila melanogaster]
ADK48066.1 odorant receptor 7a [Drosophila melanogaster]
ADK48065.1 odorant receptor 7a [Drosophila melanogaster]
ADK48064.1 odorant receptor 7a [Drosophila melanogaster]
ADK48063.1 odorant receptor 7a [Drosophila melanogaster]
ADK48062.1 odorant receptor 7a [Drosophila melanogaster]
ADK48061.1 odorant receptor 7a [Drosophila melanogaster]
ADK48060.1 odorant receptor 7a [Drosophila melanogaster]
ADK48059.1 odorant receptor 7a [Drosophila melanogaster]
ADK48058.1 odorant receptor 7a [Drosophila melanogaster]
ADK48057.1 odorant receptor 7a [Drosophila melanogaster]
ADK48056.1 odorant receptor 7a [Drosophila melanogaster]
ADK48055.1 odorant receptor 7a [Drosophila melanogaster]
ADK48054.1 odorant receptor 7a [Drosophila melanogaster]
ADK48053.1 odorant receptor 7a [Drosophila melanogaster]
ADK48052.1 odorant receptor 7a [Drosophila melanogaster]
ADK48051.1 odorant receptor 42b [Drosophila melanogaster]
ADK48050.1 odorant receptor 42b [Drosophila melanogaster]
ADK48049.1 odorant receptor 42b [Drosophila melanogaster]
ADK48048.1 odorant receptor 42b [Drosophila melanogaster]
ADK48047.1 odorant receptor 42b [Drosophila melanogaster]
ADK48046.1 odorant receptor 42b [Drosophila melanogaster]
ADK48045.1 odorant receptor 42b [Drosophila melanogaster]
ADK48044.1 odorant receptor 42b [Drosophila melanogaster]
ADK48043.1 odorant receptor 42b [Drosophila melanogaster]
ADK48042.1 odorant receptor 42b [Drosophila melanogaster]
ADK48041.1 odorant receptor 42b [Drosophila melanogaster]
ADK48040.1 odorant receptor 42b [Drosophila melanogaster]
ADK48039.1 odorant receptor 42b [Drosophila melanogaster]
ADK48038.1 odorant receptor 42b [Drosophila melanogaster]
ADK48037.1 odorant receptor 42b [Drosophila melanogaster]
ADK48036.1 odorant receptor 42b [Drosophila melanogaster]
ADK48035.1 odorant receptor 42b [Drosophila melanogaster]
ADK48034.1 odorant receptor 42b [Drosophila melanogaster]
ADK48033.1 odorant receptor 42b [Drosophila melanogaster]
ADK48032.1 odorant receptor 42b [Drosophila melanogaster]
ADK48031.1 odorant receptor 42b [Drosophila melanogaster]
ADK48030.1 odorant receptor 42b [Drosophila melanogaster]
ADK48029.1 odorant receptor 42b [Drosophila melanogaster]
ADK48028.1 odorant receptor 42b [Drosophila melanogaster]
ADK48027.1 odorant receptor 42b [Drosophila melanogaster]
ADK48026.1 odorant receptor 42b [Drosophila melanogaster]
ADK48025.1 odorant receptor 42b [Drosophila melanogaster]
ADK48024.1 odorant receptor 42b [Drosophila melanogaster]
ADK48023.1 odorant receptor 42b [Drosophila melanogaster]
ADK48022.1 odorant receptor 42b [Drosophila melanogaster]
ADK48021.1 odorant receptor 42b [Drosophila melanogaster]
ADK48020.1 odorant receptor 42b [Drosophila melanogaster]
ADK48019.1 odorant receptor 42b [Drosophila melanogaster]
ADK48018.1 odorant receptor 42b [Drosophila melanogaster]
ADK48017.1 odorant receptor 42b [Drosophila melanogaster]
ADK48016.1 odorant receptor 42b [Drosophila melanogaster]
ADK48015.1 odorant receptor 42b [Drosophila melanogaster]
ADK48014.1 odorant receptor 42b [Drosophila melanogaster]
ADK48013.1 odorant receptor 42b [Drosophila melanogaster]
ADK48012.1 odorant receptor 42b [Drosophila melanogaster]
ADK48011.1 odorant receptor 42b [Drosophila melanogaster]
ADK48010.1 odorant receptor 42b [Drosophila melanogaster]
ADK48009.1 odorant receptor 42b [Drosophila melanogaster]
ADK48008.1 odorant receptor 42b [Drosophila melanogaster]
ADK48007.1 odorant receptor 42b [Drosophila melanogaster]
CBA14137.1 odorant receptor 85c, partial [Drosophila melanogaster]
CBA14136.1 odorant receptor 85c, partial [Drosophila melanogaster]
CBA14135.1 odorant receptor 85c, partial [Drosophila melanogaster]
CBA14134.1 odorant receptor 85c, partial [Drosophila melanogaster]
CBA14133.1 odorant receptor 85c, partial [Drosophila melanogaster]
CBA14132.1 odorant receptor 85c, partial [Drosophila melanogaster]
CBA14131.1 odorant receptor 85c, partial [Drosophila melanogaster]
CBA14130.1 odorant receptor 85c, partial [Drosophila melanogaster]
CBA14129.1 odorant receptor 85c, partial [Drosophila melanogaster]
CBA14128.1 odorant receptor 85c, partial [Drosophila melanogaster]
CBA14127.1 odorant receptor 85c, partial [Drosophila melanogaster]
CBA14116.1 odorant receptor 98a, partial [Drosophila melanogaster]
CBA14115.1 odorant receptor 98a, partial [Drosophila melanogaster]
CBA14114.1 odorant receptor 98a, partial [Drosophila melanogaster]
CBA14113.1 odorant receptor 98a, partial [Drosophila melanogaster]
CBA14112.1 odorant receptor 98a, partial [Drosophila melanogaster]
CBA14111.1 odorant receptor 98a, partial [Drosophila melanogaster]
CBA14110.1 odorant receptor 98a, partial [Drosophila melanogaster]
CBA14109.1 odorant receptor 98a, partial [Drosophila melanogaster]
CBA14108.1 odorant receptor 98a, partial [Drosophila melanogaster]
CBA14107.1 odorant receptor 98a, partial [Drosophila melanogaster]
CBA14094.1 odorant receptor 94b, partial [Drosophila melanogaster]
CBA14093.1 odorant receptor 94b, partial [Drosophila melanogaster]
CBA14092.1 odorant receptor 94b, partial [Drosophila melanogaster]
CBA14091.1 odorant receptor 94b, partial [Drosophila melanogaster]
CBA14090.1 odorant receptor 94b, partial [Drosophila melanogaster]
CBA14089.1 odorant receptor 94b, partial [Drosophila melanogaster]
CBA14088.1 odorant receptor 94b, partial [Drosophila melanogaster]
CBA14087.1 odorant receptor 94b, partial [Drosophila melanogaster]
CBA14086.1 odorant receptor 94b, partial [Drosophila melanogaster]
CBA14068.1 odorant receptor 94a, partial [Drosophila melanogaster]
CBA14067.1 odorant receptor 94a, partial [Drosophila melanogaster]
CBA14066.1 odorant receptor 94a, partial [Drosophila melanogaster]
CBA14065.1 odorant receptor 94a, partial [Drosophila melanogaster]
CBA14064.1 odorant receptor 94a, partial [Drosophila melanogaster]
CBA14063.1 odorant receptor 94a, partial [Drosophila melanogaster]
CBA14062.1 odorant receptor 94a, partial [Drosophila melanogaster]
CBA14061.1 odorant receptor 94a, partial [Drosophila melanogaster]
CBA14060.1 odorant receptor 94a, partial [Drosophila melanogaster]
CBA14059.1 odorant receptor 94a, partial [Drosophila melanogaster]
CBA14058.1 odorant receptor 94a, partial [Drosophila melanogaster]
CBA14044.1 odorant receptor 92a, partial [Drosophila melanogaster]
CBA14043.1 odorant receptor 92a, partial [Drosophila melanogaster]
CBA14042.1 odorant receptor 92a, partial [Drosophila melanogaster]
CBA14041.1 odorant receptor 92a, partial [Drosophila melanogaster]
CBA14040.1 odorant receptor 92a, partial [Drosophila melanogaster]
CBA14039.1 odorant receptor 92a, partial [Drosophila melanogaster]
CBA14038.1 odorant receptor 92a, partial [Drosophila melanogaster]
CBA14037.1 odorant receptor 92a, partial [Drosophila melanogaster]
CBA14036.1 odorant receptor 92a, partial [Drosophila melanogaster]
CBA14035.1 odorant receptor 92a, partial [Drosophila melanogaster]
CBA14034.1 odorant receptor 92a, partial [Drosophila melanogaster]
CBA14017.1 odorant receptor 88a, partial [Drosophila melanogaster]
CBA14016.1 odorant receptor 88a, partial [Drosophila melanogaster]
CBA14015.1 odorant receptor 88a, partial [Drosophila melanogaster]
CBA14014.1 odorant receptor 88a, partial [Drosophila melanogaster]
CBA13991.1 odorant receptor 85f, partial [Drosophila melanogaster]
CBA13990.1 odorant receptor 85f, partial [Drosophila melanogaster]
CBA13989.1 odorant receptor 85f, partial [Drosophila melanogaster]
CBA13988.1 odorant receptor 85f, partial [Drosophila melanogaster]
CBA13987.1 odorant receptor 85f, partial [Drosophila melanogaster]
CBA13986.1 odorant receptor 85f, partial [Drosophila melanogaster]
CBA13985.1 odorant receptor 85f, partial [Drosophila melanogaster]
CBA13984.1 odorant receptor 85f, partial [Drosophila melanogaster]
CBA13983.1 odorant receptor 85f, partial [Drosophila melanogaster]
CBA13982.1 odorant receptor 85f, partial [Drosophila melanogaster]
CBA13981.1 odorant receptor 85f, partial [Drosophila melanogaster]
CBA13963.1 odorant receptor 85e, partial [Drosophila melanogaster]
CBA13962.1 odorant receptor 85e, partial [Drosophila melanogaster]
CBA13961.1 odorant receptor 85e, partial [Drosophila melanogaster]
CBA13960.1 odorant receptor 85e, partial [Drosophila melanogaster]
CBA13959.1 odorant receptor 85e, partial [Drosophila melanogaster]
CBA13958.1 odorant receptor 85e, partial [Drosophila melanogaster]
CBA13957.1 odorant receptor 85e, partial [Drosophila melanogaster]
CBA13956.1 odorant receptor 85e, partial [Drosophila melanogaster]
CBA13955.1 odorant receptor 85e, partial [Drosophila melanogaster]
CBA13954.1 odorant receptor 85e, partial [Drosophila melanogaster]
CBA13953.1 odorant receptor 85w, partial [Drosophila melanogaster]
CBA13940.1 odorant receptor 85d, partial [Drosophila melanogaster]
CBA13939.1 odorant receptor 85d, partial [Drosophila melanogaster]
CBA13938.1 odorant receptor 85d, partial [Drosophila melanogaster]
CBA13937.1 odorant receptor 85d, partial [Drosophila melanogaster]
CBA13936.1 odorant receptor 85d, partial [Drosophila melanogaster]
CBA13935.1 odorant receptor 85d, partial [Drosophila melanogaster]
CBA13934.1 odorant receptor 85d, partial [Drosophila melanogaster]
CBA13933.1 odorant receptor 85d, partial [Drosophila melanogaster]
CBA13932.1 odorant receptor 85d, partial [Drosophila melanogaster]
CBA13931.1 odorant receptor 85d, partial [Drosophila melanogaster]
CBA13930.1 odorant receptor 85d, partial [Drosophila melanogaster]
CBA13929.1 odorant receptor 85b, partial [Drosophila melanogaster]
CBA13928.1 odorant receptor 85b, partial [Drosophila melanogaster]
CBA13927.1 odorant receptor 85b, partial [Drosophila melanogaster]
CBA13926.1 odorant receptor 85b, partial [Drosophila melanogaster]
CBA13925.1 odorant receptor 85b, partial [Drosophila melanogaster]
CBA13924.1 odorant receptor 85b, partial [Drosophila melanogaster]
CBA13891.1 odorant receptor 85a, partial [Drosophila melanogaster]
CBA13890.1 odorant receptor 85a, partial [Drosophila melanogaster]
CBA13889.1 odorant receptor 85a, partial [Drosophila melanogaster]
CBA13888.1 odorant receptor 85a, partial [Drosophila melanogaster]
CBA13887.1 odorant receptor 85a, partial [Drosophila melanogaster]
CBA13886.1 odorant receptor 85a, partial [Drosophila melanogaster]
CBA13885.1 odorant receptor 85a, partial [Drosophila melanogaster]
CBA13884.1 odorant receptor 85a, partial [Drosophila melanogaster]
CBA13883.1 odorant receptor 85a, partial [Drosophila melanogaster]
CBA13882.1 odorant receptor 85a, partial [Drosophila melanogaster]
CBA13881.1 odorant receptor 85a, partial [Drosophila melanogaster]
CBA13865.1 odorant receptor 83c, partial [Drosophila melanogaster]
CBA13864.1 odorant receptor 83c, partial [Drosophila melanogaster]
CBA13863.1 odorant receptor 83c, partial [Drosophila melanogaster]
CBA13862.1 odorant receptor 83c, partial [Drosophila melanogaster]
CBA13861.1 odorant receptor 83c, partial [Drosophila melanogaster]
CBA13860.1 odorant receptor 83c, partial [Drosophila melanogaster]
CBA13859.1 odorant receptor 83c, partial [Drosophila melanogaster]
CBA13858.1 odorant receptor 83c, partial [Drosophila melanogaster]
CBA13857.1 odorant receptor 83c, partial [Drosophila melanogaster]
CBA13845.1 odorant receptor 83a, partial [Drosophila melanogaster]
CBA13844.1 odorant receptor 83b, partial [Drosophila melanogaster]
CBA13843.1 odorant receptor 83b, partial [Drosophila melanogaster]
CBA13842.1 odorant receptor 83b, partial [Drosophila melanogaster]
CBA13841.1 odorant receptor 83b, partial [Drosophila melanogaster]
CBA13840.1 odorant receptor 83b, partial [Drosophila melanogaster]
CBA13839.1 odorant receptor 83b, partial [Drosophila melanogaster]
CBA13838.1 odorant receptor 83b, partial [Drosophila melanogaster]
CBA13837.1 odorant receptor 83b, partial [Drosophila melanogaster]
CBA13836.1 odorant receptor 83b, partial [Drosophila melanogaster]
CBA13817.1 odorant receptor 83a, partial [Drosophila melanogaster]
CBA13816.1 odorant receptor 83a, partial [Drosophila melanogaster]
CBA13815.1 odorant receptor 83a, partial [Drosophila melanogaster]
CBA13814.1 odorant receptor 83a, partial [Drosophila melanogaster]
CBA13813.1 odorant receptor 83a, partial [Drosophila melanogaster]
CBA13812.1 odorant receptor 83a, partial [Drosophila melanogaster]
CBA13811.1 odorant receptor 83a, partial [Drosophila melanogaster]
CBA13810.1 odorant receptor 83a, partial [Drosophila melanogaster]
CBA13809.1 odorant receptor 83a, partial [Drosophila melanogaster]
CBA13808.1 odorant receptor 83a, partial [Drosophila melanogaster]
CBA13807.1 odorant receptor 83a, partial [Drosophila melanogaster]
CBA13755.1 odorant receptor 82a, partial [Drosophila melanogaster]
CBA13754.1 odorant receptor 82a, partial [Drosophila melanogaster]
CBA13753.1 odorant receptor 82a, partial [Drosophila melanogaster]
CBA13752.1 odorant receptor 82a, partial [Drosophila melanogaster]
CBA13751.1 odorant receptor 82a, partial [Drosophila melanogaster]
CBA13750.1 odorant receptor 82a, partial [Drosophila melanogaster]
CBA13749.1 odorant receptor 82a, partial [Drosophila melanogaster]
CBA13748.1 odorant receptor 82a, partial [Drosophila melanogaster]
CBA13747.1 odorant receptor 82a, partial [Drosophila melanogaster]
CBA13746.1 odorant receptor 82a, partial [Drosophila melanogaster]
CBA13734.1 odorant receptor 67c, partial [Drosophila melanogaster]
CBA13733.1 odorant receptor 67c, partial [Drosophila melanogaster]
CBA13732.1 odorant receptor 67c, partial [Drosophila melanogaster]
CBA13731.1 odorant receptor 67c, partial [Drosophila melanogaster]
CBA13730.1 odorant receptor 67c, partial [Drosophila melanogaster]
CBA13729.1 odorant receptor 67c, partial [Drosophila melanogaster]
CBA13728.1 odorant receptor 67c, partial [Drosophila melanogaster]
CBA13727.1 odorant receptor 67c, partial [Drosophila melanogaster]
CBA13726.1 odorant receptor 67c, partial [Drosophila melanogaster]
CBA13725.1 odorant receptor 67c, partial [Drosophila melanogaster]
CBA13717.1 odorant receptor 67b, partial [Drosophila melanogaster]
CBA13716.1 odorant receptor 67b, partial [Drosophila melanogaster]
CBA13715.1 odorant receptor 67b, partial [Drosophila melanogaster]
CBA13714.1 odorant receptor 67b, partial [Drosophila melanogaster]
CBA13713.1 odorant receptor 67b, partial [Drosophila melanogaster]
CBA13712.1 odorant receptor 67b, partial [Drosophila melanogaster]
CBA13711.1 odorant receptor 67b, partial [Drosophila melanogaster]
CBA13699.1 odorant receptor 63a, partial [Drosophila melanogaster]
CBA13698.1 odorant receptor 63a, partial [Drosophila melanogaster]
CBA13697.1 odorant receptor 63a, partial [Drosophila melanogaster]
CBA13696.1 odorant receptor 63a, partial [Drosophila melanogaster]
CBA13695.1 odorant receptor 63a, partial [Drosophila melanogaster]
CBA13694.1 odorant receptor 63a, partial [Drosophila melanogaster]
CBA13693.1 odorant receptor 63a, partial [Drosophila melanogaster]
CBA13692.1 odorant receptor 63a, partial [Drosophila melanogaster]
CBA13679.1 odorant receptor 74a, partial [Drosophila melanogaster]
CBA13678.1 odorant receptor 74a, partial [Drosophila melanogaster]
CBA13677.1 odorant receptor 74a, partial [Drosophila melanogaster]
CBA13676.1 odorant receptor 74a, partial [Drosophila melanogaster]
CBA13675.1 odorant receptor 74a, partial [Drosophila melanogaster]
CBA13674.1 odorant receptor 74a, partial [Drosophila melanogaster]
CBA13673.1 odorant receptor 74a, partial [Drosophila melanogaster]
CBA13672.1 odorant receptor 74a, partial [Drosophila melanogaster]
CBA13671.1 odorant receptor 74a, partial [Drosophila melanogaster]
CBA13670.1 odorant receptor 74a, partial [Drosophila melanogaster]
CBA13669.1 odorant receptor 74a, partial [Drosophila melanogaster]
CBA13656.1 odorant receptor 71a, partial [Drosophila melanogaster]
CBA13655.1 odorant receptor 71a, partial [Drosophila melanogaster]
CBA13654.1 odorant receptor 71a, partial [Drosophila melanogaster]
CBA13653.1 odorant receptor 71a, partial [Drosophila melanogaster]
CBA13652.1 odorant receptor 71a, partial [Drosophila melanogaster]
CBA13651.1 odorant receptor 71a, partial [Drosophila melanogaster]
CBA13650.1 odorant receptor 71a, partial [Drosophila melanogaster]
CBA13649.1 odorant receptor 71a, partial [Drosophila melanogaster]
CBA13648.1 odorant receptor 71a, partial [Drosophila melanogaster]
CBA13634.1 odorant receptor 69a, partial [Drosophila melanogaster]
CBA13633.1 odorant receptor 69a, partial [Drosophila melanogaster]
CBA13632.1 odorant receptor 69a, partial [Drosophila melanogaster]
CBA13631.1 odorant receptor 69a, partial [Drosophila melanogaster]
CBA13630.1 odorant receptor 69a, partial [Drosophila melanogaster]
CBA13629.1 odorant receptor 69a, partial [Drosophila melanogaster]
CBA13628.1 odorant receptor 69a, partial [Drosophila melanogaster]
CBA13627.1 odorant receptor 69a, partial [Drosophila melanogaster]
CBA13626.1 odorant receptor 69a, partial [Drosophila melanogaster]
CBA13625.1 odorant receptor 69a, partial [Drosophila melanogaster]
CBA13624.1 odorant receptor 69a, partial [Drosophila melanogaster]
CBA13614.1 odorant receptor 67d, partial [Drosophila melanogaster]
CBA13593.1 odorant receptor 65c, partial [Drosophila melanogaster]
CBA13592.1 odorant receptor 65c, partial [Drosophila melanogaster]
CBA13591.1 odorant receptor 65c, partial [Drosophila melanogaster]
CBA13590.1 odorant receptor 65c, partial [Drosophila melanogaster]
CBA13589.1 odorant receptor 65c, partial [Drosophila melanogaster]
CBA13588.1 odorant receptor 65c, partial [Drosophila melanogaster]
CBA13587.1 odorant receptor 65c, partial [Drosophila melanogaster]
CBA13586.1 odorant receptor 65c, partial [Drosophila melanogaster]
CBA13585.1 odorant receptor 65b, partial [Drosophila melanogaster]
CBA13584.1 odorant receptor 65b, partial [Drosophila melanogaster]
CBA13583.1 odorant receptor 65b, partial [Drosophila melanogaster]
CBA13582.1 odorant receptor 65b, partial [Drosophila melanogaster]
CBA13581.1 odorant receptor 65b, partial [Drosophila melanogaster]
CBA13580.1 odorant receptor 65b, partial [Drosophila melanogaster]
CBA13579.1 odorant receptor 65b, partial [Drosophila melanogaster]
CBA13571.1 odorant receptor 65a, partial [Drosophila melanogaster]
CBA13570.1 odorant receptor 65a, partial [Drosophila melanogaster]
CBA13569.1 odorant receptor 65a, partial [Drosophila melanogaster]
CBA13568.1 odorant receptor 65a, partial [Drosophila melanogaster]
CBA13567.1 odorant receptor 65a, partial [Drosophila melanogaster]
AAD39006.1 odorant receptor DOR24 [Drosophila melanogaster]
AAD26359.2 odorant receptor DOR67 [Drosophila melanogaster]
AAD26361.1 odorant receptor DOR87 [Drosophila melanogaster]
AAD26360.1 odorant receptor DOR64 [Drosophila melanogaster]
AAD26357.1 odorant receptor DOR104 [Drosophila melanogaster]
AAT71306.1 odorant receptor Or83b [Drosophila melanogaster]
CAR79365.1 odorant receptor 22 [Drosophila melanogaster]
CAR79364.1 odorant receptor 22 [Drosophila melanogaster]
CAR79363.1 odorant receptor 22 [Drosophila melanogaster]
CAR79362.1 odorant receptor 22 [Drosophila melanogaster]
CAR79361.1 odorant receptor 22 [Drosophila melanogaster]
CAR79360.1 odorant receptor 22 [Drosophila melanogaster]
CAR79359.1 odorant receptor 22 [Drosophila melanogaster]
CAR79358.1 odorant receptor 22 [Drosophila melanogaster]
CAR79357.1 odorant receptor 22 [Drosophila melanogaster]
CAR79356.1 odorant receptor 22 [Drosophila melanogaster]
CAR79355.1 odorant receptor 22 [Drosophila melanogaster]
CAR79354.1 odorant receptor 22 [Drosophila melanogaster]
CAR79353.1 odorant receptor 22 [Drosophila melanogaster]
CAR79352.1 odorant receptor 22 [Drosophila melanogaster]
CAR79351.1 odorant receptor 22 [Drosophila melanogaster]
CAR79350.1 odorant receptor 22 [Drosophila melanogaster]
CAR79349.1 odorant receptor 22 [Drosophila melanogaster]
CAR79348.1 odorant receptor 22 [Drosophila melanogaster]
CAR79347.1 odorant receptor 22 [Drosophila melanogaster]
CAR79346.1 odorant receptor 22 [Drosophila melanogaster]
CAR79345.1 odorant receptor 22 [Drosophila melanogaster]
CAR79344.1 odorant receptor 22 [Drosophila melanogaster]
CAR79343.1 odorant receptor 22 [Drosophila melanogaster]
CAR79342.1 odorant receptor 22 [Drosophila melanogaster]
CAR79341.1 odorant receptor 22 [Drosophila melanogaster]
CAR79340.1 odorant receptor 22 [Drosophila melanogaster]
CAR79114.1 odorant receptor 22b [Drosophila melanogaster]
CAR79113.1 odorant receptor 22a [Drosophila melanogaster]
CAR79112.1 odorant receptor 22b [Drosophila melanogaster]
CAR79111.1 odorant receptor 22a [Drosophila melanogaster]
CAR79110.1 odorant receptor 22b [Drosophila melanogaster]
CAR79109.1 odorant receptor 22a [Drosophila melanogaster]
CAR79108.1 odorant receptor 22b [Drosophila melanogaster]
CAR79107.1 odorant receptor 22a [Drosophila melanogaster]
CAR79106.1 odorant receptor 22b [Drosophila melanogaster]
CAR79105.1 odorant receptor 22a [Drosophila melanogaster]
CAR79104.1 odorant receptor 22b [Drosophila melanogaster]
CAR79103.1 odorant receptor 22a [Drosophila melanogaster]
CAR79102.1 odorant receptor 22b [Drosophila melanogaster]
CAR79101.1 odorant receptor 22a [Drosophila melanogaster]
CAR79100.1 odorant receptor 22b [Drosophila melanogaster]
CAR79099.1 odorant receptor 22a [Drosophila melanogaster]
CAR79098.1 odorant receptor 22b [Drosophila melanogaster]
CAR79097.1 odorant receptor 22a [Drosophila melanogaster]
CAR79096.1 odorant receptor 22b [Drosophila melanogaster]
CAR79095.1 odorant receptor 22a [Drosophila melanogaster]
CAR79094.1 odorant receptor 22b [Drosophila melanogaster]
CAR79093.1 odorant receptor 22a [Drosophila melanogaster]
CAR79092.1 odorant receptor 22b [Drosophila melanogaster]
CAR79091.1 odorant receptor 22a [Drosophila melanogaster]
CAR79090.1 odorant receptor 22b [Drosophila melanogaster]
CAR79089.1 odorant receptor 22a [Drosophila melanogaster]
CAR79088.1 odorant receptor 22b [Drosophila melanogaster]
CAR79087.1 odorant receptor 22a [Drosophila melanogaster]
CAR79086.1 odorant receptor 22b [Drosophila melanogaster]
CAR79085.1 odorant receptor 22a [Drosophila melanogaster]
CAR79084.1 odorant receptor 22b [Drosophila melanogaster]
CAR79083.1 odorant receptor 22a [Drosophila melanogaster]
CAR79082.1 odorant receptor 22b [Drosophila melanogaster]
CAR79081.1 odorant receptor 22a [Drosophila melanogaster]
CAR79080.1 odorant receptor 22b [Drosophila melanogaster]
CAR79079.1 odorant receptor 22a [Drosophila melanogaster]
CAR79078.1 odorant receptor 22b [Drosophila melanogaster]
CAR79077.1 odorant receptor 22a [Drosophila melanogaster]
CAR79076.1 odorant receptor 22b [Drosophila melanogaster]
CAR79075.1 odorant receptor 22a [Drosophila melanogaster]
CAR79074.1 odorant receptor 22b [Drosophila melanogaster]
CAR79073.1 odorant receptor 22a [Drosophila melanogaster]
CAR79072.1 odorant receptor 22b [Drosophila melanogaster]
CAR79071.1 odorant receptor 22a [Drosophila melanogaster]
CAR79070.1 odorant receptor 22b [Drosophila melanogaster]
CAR79069.1 odorant receptor 22a [Drosophila melanogaster]
CAR79068.1 odorant receptor 22b [Drosophila melanogaster]
CAR79067.1 odorant receptor 22a [Drosophila melanogaster]
CAR79066.1 odorant receptor 22b [Drosophila melanogaster]
CAR79065.1 odorant receptor 22a [Drosophila melanogaster]
CAR79064.1 odorant receptor 22b [Drosophila melanogaster]
CAR79063.1 odorant receptor 22a [Drosophila melanogaster]
CAR79062.1 odorant receptor 22b [Drosophila melanogaster]
CAR79061.1 odorant receptor 22a [Drosophila melanogaster]
CAR79060.1 odorant receptor 22b [Drosophila melanogaster]
CAR79059.1 odorant receptor 22a [Drosophila melanogaster]
CAR79058.1 odorant receptor 22b [Drosophila melanogaster]
CAR79057.1 odorant receptor 22a [Drosophila melanogaster]
CAR79056.1 odorant receptor 22b [Drosophila melanogaster]
CAR79055.1 odorant receptor 22a [Drosophila melanogaster]
CAR79054.1 odorant receptor 22b [Drosophila melanogaster]
CAR79053.1 odorant receptor 22a [Drosophila melanogaster]
CAR79052.1 odorant receptor 22b [Drosophila melanogaster]
CAR79051.1 odorant receptor 22a [Drosophila melanogaster]
CAR79050.1 odorant receptor 22b [Drosophila melanogaster]
CAR79049.1 odorant receptor 22a [Drosophila melanogaster]
CAR79048.1 odorant receptor 22b [Drosophila melanogaster]
CAR79047.1 odorant receptor 22a [Drosophila melanogaster]
CAR79046.1 odorant receptor 22b [Drosophila melanogaster]
CAR79045.1 odorant receptor 22a [Drosophila melanogaster]
CAR79044.1 odorant receptor 22b [Drosophila melanogaster]
CAR79043.1 odorant receptor 22a [Drosophila melanogaster]
CAR79042.1 odorant receptor 22b [Drosophila melanogaster]
CAR79041.1 odorant receptor 22a [Drosophila melanogaster]
XP_026820377.1 odorant receptor 67a [Rhopalosiphum maidis]
XP_026819078.1 gustatory and odorant receptor 24 [Rhopalosiphum maidis]
XP_026814691.1 odorant receptor 2a-like [Rhopalosiphum maidis]
XP_026814479.1 odorant receptor 43b-like [Rhopalosiphum maidis]
XP_026814179.1 odorant receptor 22b-like [Rhopalosiphum maidis]
XP_026807794.1 gustatory and odorant receptor 24 [Rhopalosiphum maidis]
XP_026807464.1 odorant receptor 46a-like [Rhopalosiphum maidis]
XP_026807368.1 odorant receptor 46a-like [Rhopalosiphum maidis]
XP_026807283.1 odorant receptor 22a-like [Rhopalosiphum maidis]
XP_026807240.1 odorant receptor 33b-like [Rhopalosiphum maidis]
XP_026807158.1 odorant receptor 46a-like [Rhopalosiphum maidis]
XP_026807122.1 odorant receptor 22c-like [Rhopalosiphum maidis]
XP_026807026.1 odorant receptor 43b-like [Rhopalosiphum maidis]
XP_026807025.1 odorant receptor 43b-like [Rhopalosiphum maidis]
XP_026806824.1 odorant receptor 46a-like [Rhopalosiphum maidis]
XP_026806786.1 odorant receptor 46a-like [Rhopalosiphum maidis]
XP_026804939.1 odorant receptor 22c-like [Rhopalosiphum maidis]
XP_026804937.1 odorant receptor 22c-like [Rhopalosiphum maidis]
XP_026804936.1 odorant receptor 22c-like [Rhopalosiphum maidis]
XP_026804935.1 odorant receptor 22c-like [Rhopalosiphum maidis]
XP_026804934.1 odorant receptor 22c-like [Rhopalosiphum maidis]
XP_026822202.1 odorant receptor coreceptor [Rhopalosiphum maidis]
XP_026805470.1 odorant receptor 43b-like [Rhopalosiphum maidis]
XP_026805457.1 odorant receptor 43b-like [Rhopalosiphum maidis]
XP_026805444.1 odorant receptor 43b-like [Rhopalosiphum maidis]
XP_026805373.1 odorant receptor 2a-like [Rhopalosiphum maidis]
XP_026822384.1 odorant receptor 46a-like, partial [Rhopalosiphum maidis]
XP_026817480.1 odorant receptor 46a-like [Rhopalosiphum maidis]
XP_026687240.1 odorant receptor coreceptor-like, partial [Diaphorina citri]
XP_026685329.1 odorant receptor Or2-like [Diaphorina citri]
XP_026678730.1 odorant receptor 2a-like [Diaphorina citri]
XP_026689162.1 odorant receptor 22c-like [Diaphorina citri]
XP_008484015.1 odorant receptor coreceptor-like [Diaphorina citri]
XP_008482312.1 odorant receptor 85b-like [Diaphorina citri]
AXY87916.1 odorant receptor 29, partial [Subpsaltria yangi]
AXY87915.1 odorant receptor 28 [Subpsaltria yangi]
AXY87914.1 odorant receptor 27, partial [Subpsaltria yangi]
AXY87913.1 odorant receptor 26 [Subpsaltria yangi]
AXY87912.1 odorant receptor 25 [Subpsaltria yangi]
AXY87911.1 odorant receptor 24 [Subpsaltria yangi]
AXY87910.1 odorant receptor 23, partial [Subpsaltria yangi]
AXY87909.1 odorant receptor 22, partial [Subpsaltria yangi]
AXY87908.1 odorant receptor 21 [Subpsaltria yangi]
AXY87907.1 odorant receptor 20, partial [Subpsaltria yangi]
AXY87906.1 odorant receptor 19, partial [Subpsaltria yangi]
AXY87905.1 odorant receptor 18 [Subpsaltria yangi]
AXY87904.1 odorant receptor 17 [Subpsaltria yangi]
AXY87903.1 odorant receptor 16, partial [Subpsaltria yangi]
AXY87902.1 odorant receptor 15, partial [Subpsaltria yangi]
AXY87901.1 odorant receptor 14, partial [Subpsaltria yangi]
AXY87900.1 odorant receptor 13 [Subpsaltria yangi]
AXY87899.1 odorant receptor 12 [Subpsaltria yangi]
AXY87898.1 odorant receptor 11 [Subpsaltria yangi]
AXY87897.1 odorant receptor 10, partial [Subpsaltria yangi]
AXY87896.1 odorant receptor 9, partial [Subpsaltria yangi]
AXY87895.1 odorant receptor 8 [Subpsaltria yangi]
AXY87894.1 odorant receptor 7 [Subpsaltria yangi]
AXY87893.1 odorant receptor 6 [Subpsaltria yangi]
AXY87892.1 odorant receptor 5 [Subpsaltria yangi]
AXY87891.1 odorant receptor 4, partial [Subpsaltria yangi]
AXY87890.1 odorant receptor 3, partial [Subpsaltria yangi]
AXY87889.1 odorant receptor 2 [Subpsaltria yangi]
AXY87888.1 odorant receptor 1, partial [Subpsaltria yangi]
AXX83066.1 odorant receptor [Yemma signatus]
AXX83065.1 odorant receptor [Yemma signatus]
AXX83064.1 odorant receptor [Yemma signatus]
AXX83063.1 odorant receptor [Yemma signatus]
AXX83062.1 odorant receptor [Yemma signatus]
AXX83061.1 odorant receptor [Yemma signatus]
AXX83060.1 odorant receptor [Yemma signatus]
AXX83059.1 odorant receptor [Yemma signatus]
AXX83058.1 odorant receptor [Yemma signatus]
AXX83057.1 odorant receptor, partial [Yemma signatus]
AXX83056.1 odorant receptor [Yemma signatus]
AXX83055.1 odorant receptor [Yemma signatus]
AXX83054.1 odorant receptor [Yemma signatus]
AXX83053.1 odorant receptor [Yemma signatus]
AXX83052.1 odorant receptor [Yemma signatus]
AXX83051.1 odorant receptor [Yemma signatus]
AXX83050.1 odorant receptor [Yemma signatus]
AXX83049.1 odorant receptor [Yemma signatus]
AXX83048.1 odorant receptor [Yemma signatus]
AXX83047.1 odorant receptor [Yemma signatus]
AXX83046.1 odorant receptor [Yemma signatus]
AXX83045.1 odorant receptor [Yemma signatus]
AXX83044.1 odorant receptor, partial [Yemma signatus]
AXX83043.1 odorant receptor [Yemma signatus]
AXX83042.1 odorant receptor [Yemma signatus]
AXX83041.1 odorant receptor [Yemma signatus]
AXX83040.1 odorant receptor, partial [Yemma signatus]
AXX83039.1 odorant receptor [Yemma signatus]
AXX83038.1 odorant receptor [Yemma signatus]
AXX83037.1 odorant receptor [Yemma signatus]
AXX83036.1 odorant receptor [Yemma signatus]
AXX83035.1 odorant receptor [Yemma signatus]
AXX83034.1 odorant receptor [Yemma signatus]
AXX83033.1 odorant receptor [Yemma signatus]
AXX83032.1 odorant receptor [Yemma signatus]
AXX83031.1 odorant receptor [Yemma signatus]
AXX83030.1 odorant receptor [Yemma signatus]
AXX83029.1 odorant receptor [Yemma signatus]
AXX83028.1 odorant receptor, partial [Yemma signatus]
AXX83027.1 odorant receptor, partial [Yemma signatus]
AXX83026.1 odorant receptor [Yemma signatus]
AXX83025.1 odorant receptor [Yemma signatus]
AXX83024.1 odorant receptor [Yemma signatus]
AXX83023.1 odorant receptor [Yemma signatus]
AXX83022.1 odorant receptor, partial [Yemma signatus]
AXX83021.1 odorant receptor [Yemma signatus]
AXX83020.1 odorant receptor [Yemma signatus]
AXX83019.1 odorant receptor [Yemma signatus]
AXX83018.1 odorant receptor [Yemma signatus]
AXX83017.1 odorant receptor [Yemma signatus]
AXX83016.1 odorant receptor, partial [Yemma signatus]
AXX83015.1 odorant receptor [Yemma signatus]
AXX83014.1 odorant receptor [Yemma signatus]
AXX83013.1 odorant receptor [Yemma signatus]
AXX83012.1 odorant receptor [Yemma signatus]
AXX83011.1 odorant receptor [Yemma signatus]
AXX83010.1 odorant receptor [Yemma signatus]
AXX83009.1 odorant receptor [Yemma signatus]
AXX83008.1 odorant receptor [Yemma signatus]
AXX83007.1 odorant receptor [Yemma signatus]
AXX83006.1 odorant receptor [Yemma signatus]
AXX83005.1 odorant receptor [Yemma signatus]
AXX83004.1 odorant receptor [Yemma signatus]
AXX83003.1 odorant receptor [Yemma signatus]
AXX83002.1 odorant receptor [Yemma signatus]
AXU25106.1 odorant receptor 15 [Cyrtorhinus lividipennis]
AXU25105.1 odorant receptor 14 [Cyrtorhinus lividipennis]
AXU25104.1 odorant receptor 13 [Cyrtorhinus lividipennis]
AXU25103.1 odorant receptor 12 [Cyrtorhinus lividipennis]
AXU25102.1 odorant receptor 11 [Cyrtorhinus lividipennis]
AXU25101.1 odorant receptor 10 [Cyrtorhinus lividipennis]
AXU25100.1 odorant receptor 9 [Cyrtorhinus lividipennis]
AXU25099.1 odorant receptor 8 [Cyrtorhinus lividipennis]
AXU25098.1 odorant receptor 7 [Cyrtorhinus lividipennis]
AXU25097.1 odorant receptor 6 [Cyrtorhinus lividipennis]
AXU25096.1 odorant receptor 5 [Cyrtorhinus lividipennis]
AXU25095.1 odorant receptor 4 [Cyrtorhinus lividipennis]
AXU25094.1 odorant receptor 3 [Cyrtorhinus lividipennis]
AXU25093.1 odorant receptor 2 [Cyrtorhinus lividipennis]
AXU25092.1 odorant receptor 1 [Cyrtorhinus lividipennis]
XP_025424050.1 odorant receptor 4-like [Sipha flava]
XP_025421655.1 odorant receptor 46a [Sipha flava]
XP_025420356.1 odorant receptor 46a-like [Sipha flava]
XP_025420352.1 odorant receptor 46a-like [Sipha flava]
XP_025419973.1 gustatory and odorant receptor 24-like isoform X1 [Sipha flava]
XP_025413921.1 odorant receptor 46a-like [Sipha flava]
XP_025412888.1 odorant receptor coreceptor isoform X2 [Sipha flava]
XP_025412887.1 odorant receptor coreceptor isoform X1 [Sipha flava]
XP_025412114.1 odorant receptor 2a-like [Sipha flava]
XP_025412107.1 odorant receptor 49b-like [Sipha flava]
XP_025412092.1 gustatory and odorant receptor 22 [Sipha flava]
XP_025406248.1 odorant receptor 43a-like [Sipha flava]
XP_025405505.1 gustatory and odorant receptor 63a-like [Sipha flava]
XP_025413669.1 odorant receptor 46a-like isoform X3 [Sipha flava]
XP_025207156.1 odorant receptor 43b [Melanaphis sacchari]
XP_025205994.1 odorant receptor coreceptor isoform X2 [Melanaphis sacchari]
XP_025205992.1 odorant receptor coreceptor isoform X1 [Melanaphis sacchari]
XP_025205991.1 odorant receptor coreceptor isoform X1 [Melanaphis sacchari]
XP_025205601.1 putative odorant receptor 92a [Melanaphis sacchari]
XP_025205128.1 odorant receptor 94a-like [Melanaphis sacchari]
XP_025205106.1 gustatory and odorant receptor 63a [Melanaphis sacchari]
XP_025205100.1 odorant receptor 46a-like [Melanaphis sacchari]
XP_025205086.1 gustatory and odorant receptor 22 [Melanaphis sacchari]
XP_025204161.1 odorant receptor 67a [Melanaphis sacchari]
XP_025200899.1 odorant receptor 49b-like [Melanaphis sacchari]
XP_025200891.1 odorant receptor 33b-like [Melanaphis sacchari]
XP_025200888.1 odorant receptor 4-like [Melanaphis sacchari]
XP_025200214.1 odorant receptor 2a-like [Melanaphis sacchari]
XP_025196562.1 odorant receptor 22c-like [Melanaphis sacchari]
XP_025195448.1 odorant receptor 4-like [Melanaphis sacchari]
XP_025195447.1 odorant receptor 33a-like, partial [Melanaphis sacchari]
XP_025200524.1 odorant receptor 10a-like [Melanaphis sacchari]
XP_025197380.1 odorant receptor 67c-like [Melanaphis sacchari]
AWW05228.1 odorant receptor co-receptor [Corythucha ciliata]
XP_024219637.1 odorant receptor 4-like isoform X1 [Halyomorpha halys]
XP_014293234.2 odorant receptor 47b-like [Halyomorpha halys]
XP_024219389.1 odorant receptor 4-like [Halyomorpha halys]
XP_024219388.1 odorant receptor 4 [Halyomorpha halys]
XP_014280756.2 odorant receptor 63a-like [Halyomorpha halys]
XP_024218985.1 odorant receptor 82a [Halyomorpha halys]
XP_014290613.2 odorant receptor 45b-like [Halyomorpha halys]
XP_024218692.1 odorant receptor 4-like [Halyomorpha halys]
XP_014289020.2 odorant receptor 43a-like, partial [Halyomorpha halys]
XP_024218556.1 gustatory and odorant receptor 22-like [Halyomorpha halys]
XP_014289672.2 LOW QUALITY PROTEIN: odorant receptor 49a-like [Halyomorpha halys]
XP_024217960.1 odorant receptor 67c-like [Halyomorpha halys]
XP_024217872.1 odorant receptor coreceptor-like [Halyomorpha halys]
XP_024217871.1 odorant receptor 4-like [Halyomorpha halys]
XP_024217870.1 odorant receptor 85b-like [Halyomorpha halys]
XP_024217677.1 odorant receptor coreceptor-like [Halyomorpha halys]
XP_024217428.1 odorant receptor 30a-like [Halyomorpha halys]
XP_024217426.1 odorant receptor 24a-like [Halyomorpha halys]
XP_024217354.1 odorant receptor 94a-like [Halyomorpha halys]
XP_014287040.2 odorant receptor 4-like [Halyomorpha halys]
XP_024217341.1 odorant receptor 24a-like [Halyomorpha halys]
XP_024217340.1 odorant receptor 85b-like isoform X2 [Halyomorpha halys]
XP_014273506.2 odorant receptor 67c-like [Halyomorpha halys]
XP_014282386.2 odorant receptor 7a-like [Halyomorpha halys]
XP_024216597.1 putative odorant receptor 69a [Halyomorpha halys]
XP_024215602.1 odorant receptor 67c-like [Halyomorpha halys]
XP_024215598.1 odorant receptor 67c-like isoform X1 [Halyomorpha halys]
XP_014272535.2 odorant receptor 85b-like [Halyomorpha halys]
XP_024214894.1 odorant receptor 33a-like [Halyomorpha halys]
XP_024214260.1 odorant receptor 85b-like [Halyomorpha halys]
XP_024214259.1 odorant receptor 85b-like [Halyomorpha halys]
XP_024220181.1 odorant receptor 43a-like [Halyomorpha halys]
XP_024220019.1 odorant receptor 49b-like [Halyomorpha halys]
XP_024216661.1 odorant receptor 22b-like [Halyomorpha halys]
XP_024214129.1 odorant receptor 46a-like [Halyomorpha halys]
XP_014293240.1 gustatory and odorant receptor 63a-like [Halyomorpha halys]
XP_014290807.1 odorant receptor 85b-like [Halyomorpha halys]
XP_014290804.1 odorant receptor 4-like isoform X1 [Halyomorpha halys]
XP_014290611.1 odorant receptor 43a-like [Halyomorpha halys]
XP_014289234.1 odorant receptor 24a-like [Halyomorpha halys]
XP_014289200.1 odorant receptor 82a-like [Halyomorpha halys]
XP_014288393.1 odorant receptor 24a [Halyomorpha halys]
XP_014288391.1 odorant receptor 24a [Halyomorpha halys]
XP_014282243.1 gustatory and odorant receptor 24-like isoform X2 [Halyomorpha halys]
XP_014281820.1 gustatory and odorant receptor 63a-like [Halyomorpha halys]
XP_014279420.1 odorant receptor coreceptor [Halyomorpha halys]
XP_014278702.1 odorant receptor 67c-like [Halyomorpha halys]
XP_014274900.1 odorant receptor 30a-like [Halyomorpha halys]
XP_014272022.1 gustatory and odorant receptor 22-like [Halyomorpha halys]
XP_014271847.1 gustatory and odorant receptor 22-like [Halyomorpha halys]
XP_014271838.1 gustatory and odorant receptor 24-like [Halyomorpha halys]
XP_014270190.1 odorant receptor 4-like isoform X2 [Halyomorpha halys]
XP_014270184.1 odorant receptor 24a-like [Halyomorpha halys]
AUW64516.1 odorant receptor coreceptor [Lygus pratensis]
AUW64515.1 odorant receptor coreceptor [Adelphocoris suturalis]
AUW64514.1 odorant receptor coreceptor [Adelphocoris fasciaticollis]
NP_001303637.1 odorant receptor coreceptor [Cimex lectularius]
XP_014249191.2 odorant receptor Or2-like [Cimex lectularius]
XP_014260354.2 odorant receptor 49a-like [Cimex lectularius]
XP_024083691.1 gustatory and odorant receptor 22-like [Cimex lectularius]
XP_024083690.1 gustatory and odorant receptor 24-like isoform X3 [Cimex lectularius]
XP_024083689.1 gustatory and odorant receptor 24-like isoform X1 [Cimex lectularius]
XP_014242040.2 odorant receptor 85b-like [Cimex lectularius]
XP_024083620.1 odorant receptor 4-like [Cimex lectularius]
XP_024083261.1 gustatory and odorant receptor 22-like [Cimex lectularius]
XP_024083260.1 gustatory and odorant receptor 22-like [Cimex lectularius]
XP_014261573.2 odorant receptor 22c-like [Cimex lectularius]
XP_024081824.1 odorant receptor 46a-like [Cimex lectularius]
XP_024080353.1 putative odorant receptor 69a [Cimex lectularius]
XP_014252575.2 odorant receptor 30a-like [Cimex lectularius]
XP_024086182.1 odorant receptor 46a-like [Cimex lectularius]
XP_024086181.1 odorant receptor 46a-like [Cimex lectularius]
XP_014240741.2 putative odorant receptor 85e [Cimex lectularius]
XP_014259527.1 odorant receptor Or2-like [Cimex lectularius]
XP_014258779.1 putative odorant receptor 92a [Cimex lectularius]
XP_014258596.1 odorant receptor 67a isoform X4 [Cimex lectularius]
XP_014258595.1 odorant receptor 67a isoform X3 [Cimex lectularius]
XP_014258594.1 odorant receptor 67a isoform X3 [Cimex lectularius]
XP_014258592.1 odorant receptor 67a isoform X2 [Cimex lectularius]
XP_014258591.1 odorant receptor 67a isoform X1 [Cimex lectularius]
XP_014258590.1 odorant receptor 67a isoform X1 [Cimex lectularius]
XP_014258536.1 odorant receptor 47a-like [Cimex lectularius]
XP_014258534.1 odorant receptor 47a-like [Cimex lectularius]
XP_014258533.1 odorant receptor 47a-like [Cimex lectularius]
XP_014256808.1 odorant receptor 46a-like [Cimex lectularius]
XP_014256420.1 odorant receptor 46a-like [Cimex lectularius]
XP_014256418.1 odorant receptor 46a-like [Cimex lectularius]
XP_014256416.1 odorant receptor 46a-like [Cimex lectularius]
XP_014254419.1 odorant receptor 85c-like [Cimex lectularius]
XP_014249551.1 putative odorant receptor 92a [Cimex lectularius]
XP_014244363.1 putative odorant receptor 69a isoform X2 [Cimex lectularius]
XP_014244362.1 putative odorant receptor 69a isoform X1 [Cimex lectularius]
XP_014244354.1 gustatory and odorant receptor 22-like [Cimex lectularius]
XP_014243997.1 gustatory and odorant receptor 21a-like [Cimex lectularius]
XP_014243994.1 gustatory and odorant receptor 24-like isoform X2 [Cimex lectularius]
XP_014243941.1 gustatory and odorant receptor 22-like [Cimex lectularius]
XP_014241922.1 odorant receptor 4-like isoform X1 [Cimex lectularius]
XP_014262136.1 odorant receptor 46a-like [Cimex lectularius]
XP_014261973.1 odorant receptor 85b-like [Cimex lectularius]
XP_014261971.1 odorant receptor 4-like isoform X1 [Cimex lectularius]
XP_014261949.1 putative odorant receptor 69a [Cimex lectularius]
XP_014261896.1 odorant receptor 85c-like [Cimex lectularius]
XP_014261210.1 odorant receptor 45b-like [Cimex lectularius]
XP_022206223.1 odorant receptor 22c-like, partial [Nilaparvata lugens]
XP_022204744.1 odorant receptor 43a-like [Nilaparvata lugens]
XP_022203987.1 odorant receptor 43a-like [Nilaparvata lugens]
XP_022203305.1 odorant receptor 9a-like, partial [Nilaparvata lugens]
XP_022202911.1 putative odorant receptor 85e [Nilaparvata lugens]
XP_022201903.1 odorant receptor 43a-like [Nilaparvata lugens]
XP_022201694.1 odorant receptor 43a-like isoform X2 [Nilaparvata lugens]
XP_022200947.1 odorant receptor 43a-like [Nilaparvata lugens]
XP_022200348.1 odorant receptor 56a-like [Nilaparvata lugens]
XP_022200228.1 odorant receptor 83a-like [Nilaparvata lugens]
XP_022199828.1 odorant receptor 23a-like [Nilaparvata lugens]
XP_022199572.1 odorant receptor 56a-like, partial [Nilaparvata lugens]
XP_022199192.1 odorant receptor 43a-like [Nilaparvata lugens]
XP_022197329.1 odorant receptor 43a-like [Nilaparvata lugens]
XP_022196952.1 putative odorant receptor 19b [Nilaparvata lugens]
XP_022196951.1 putative odorant receptor 19b [Nilaparvata lugens]
XP_022194691.1 putative odorant receptor 19b [Nilaparvata lugens]
XP_022193747.1 odorant receptor 23a-like [Nilaparvata lugens]
XP_022192649.1 odorant receptor Or2-like [Nilaparvata lugens]
XP_022192585.1 putative odorant receptor 69a [Nilaparvata lugens]
XP_022191698.1 gustatory and odorant receptor 24-like [Nilaparvata lugens]
XP_022189888.1 odorant receptor Or2-like [Nilaparvata lugens]
XP_022189749.1 odorant receptor 63a-like [Nilaparvata lugens]
XP_022185660.1 odorant receptor coreceptor [Nilaparvata lugens]
XP_022185545.1 odorant receptor 46a [Nilaparvata lugens]
XP_022184376.1 odorant receptor Or2-like [Nilaparvata lugens]
XP_022207573.1 odorant receptor 7a-like [Nilaparvata lugens]
XP_022199283.1 odorant receptor 43a-like isoform X2 [Nilaparvata lugens]
XP_022178692.1 odorant receptor 46a-like [Myzus persicae]
XP_022175226.1 odorant receptor 2a-like [Myzus persicae]
XP_022174880.1 odorant receptor 43b-like [Myzus persicae]
XP_022173211.1 odorant receptor 43b-like [Myzus persicae]
XP_022171404.1 odorant receptor 46a-like [Myzus persicae]
XP_022170541.1 LOW QUALITY PROTEIN: odorant receptor 67c-like [Myzus persicae]
XP_022169094.1 odorant receptor 46a-like [Myzus persicae]
XP_022169093.1 odorant receptor 46a-like, partial [Myzus persicae]
XP_022169092.1 odorant receptor 33b-like [Myzus persicae]
XP_022169061.1 odorant receptor 46a-like [Myzus persicae]
XP_022169059.1 odorant receptor 46a-like [Myzus persicae]
XP_022167641.1 odorant receptor 22c-like [Myzus persicae]
XP_022167526.1 odorant receptor 67a-like [Myzus persicae]
XP_022167078.1 LOW QUALITY PROTEIN: odorant receptor 10a-like [Myzus persicae]
XP_022164565.1 odorant receptor 4-like [Myzus persicae]
XP_022163466.1 odorant receptor 43b-like [Myzus persicae]
XP_022162893.1 odorant receptor coreceptor isoform X2 [Myzus persicae]
XP_022162892.1 odorant receptor coreceptor isoform X2 [Myzus persicae]
XP_022162891.1 odorant receptor coreceptor isoform X1 [Myzus persicae]
XP_022160649.1 odorant receptor 46a-like [Myzus persicae]
XP_022160430.1 odorant receptor 46a-like [Myzus persicae]
XP_022183395.1 LOW QUALITY PROTEIN: gustatory and odorant receptor 22 [Myzus persicae]
XP_022180856.1 odorant receptor 33b-like [Myzus persicae]
XP_022166919.1 gustatory and odorant receptor 63a isoform X2 [Myzus persicae]
XP_022166914.1 gustatory and odorant receptor 63a isoform X1 [Myzus persicae]
XP_022169050.1 odorant receptor 22b-like [Myzus persicae]
JAW15148.1 putative odorant receptor 92a, partial [Panstrongylus lignarius]
JAW14756.1 putative odorant receptor 83a, partial [Panstrongylus lignarius]
JAW14609.1 putative odorant receptor 43a, partial [Panstrongylus lignarius]
JAW13668.1 putative odorant receptor 82, partial [Panstrongylus lignarius]
JAW12416.1 putative odorant receptor 67a, partial [Panstrongylus lignarius]
JAW11078.1 putative 7tm odorant receptor, partial [Panstrongylus lignarius]
APX56327.1 gustatory and odorant receptor 24-like protein isoform X2 [Halyomorpha halys]
APX56326.1 gustatory and odorant receptor 24-like protein isoform X1 [Halyomorpha halys]
APX56325.1 gustatory and odorant receptor 63a-like protein, partial [Halyomorpha halys]
APX56324.1 odorant receptor 49b-like protein, partial [Halyomorpha halys]
APX56323.1 odorant receptor 85f, partial [Halyomorpha halys]
APX56322.1 gustatory and odorant receptor 22-like protein, partial [Halyomorpha halys]
XP_018913534.1 PREDICTED: gustatory and odorant receptor 22-like [Bemisia tabaci]
XP_018901088.1 PREDICTED: putative odorant receptor 85d [Bemisia tabaci]
XP_018916513.1 PREDICTED: odorant receptor coreceptor [Bemisia tabaci]
XP_016664716.1 PREDICTED: gustatory and odorant receptor 22-like [Acyrthosiphon pisum]
XP_016663583.1 PREDICTED: odorant receptor 49a-like [Acyrthosiphon pisum]
XP_016663202.1 PREDICTED: odorant receptor 2a-like [Acyrthosiphon pisum]
XP_016662893.1 PREDICTED: gustatory and odorant receptor 24 [Acyrthosiphon pisum]
XP_016662512.1 PREDICTED: odorant receptor 22b-like [Acyrthosiphon pisum]
XP_016662182.1 PREDICTED: odorant receptor 46a-like [Acyrthosiphon pisum]
XP_016661819.1 PREDICTED: odorant receptor 67c-like [Acyrthosiphon pisum]
XP_016661713.1 PREDICTED: odorant receptor 4-like [Acyrthosiphon pisum]
XP_016661174.1 PREDICTED: odorant receptor 46a-like isoform X6 [Acyrthosiphon pisum]
XP_016661171.1 PREDICTED: odorant receptor 46a-like isoform X3 [Acyrthosiphon pisum]
XP_016661170.1 PREDICTED: odorant receptor 46a-like isoform X2 [Acyrthosiphon pisum]
XP_016660447.1 PREDICTED: odorant receptor 43b-like isoform X2 [Acyrthosiphon pisum]
XP_016660446.1 PREDICTED: odorant receptor 43b-like isoform X1 [Acyrthosiphon pisum]
XP_016659850.1 PREDICTED: odorant receptor 33a isoform X3 [Acyrthosiphon pisum]
XP_016659354.1 PREDICTED: odorant receptor 67c-like [Acyrthosiphon pisum]
XP_016657950.1 PREDICTED: odorant receptor 46a-like [Acyrthosiphon pisum]
XP_016657838.1 PREDICTED: odorant receptor 46a-like [Acyrthosiphon pisum]
XP_016657277.1 PREDICTED: gustatory and odorant receptor 22-like isoform X2 [Acyrthosiphon pisum]
XP_016657276.1 PREDICTED: gustatory and odorant receptor 22-like isoform X1 [Acyrthosiphon pisum]
XP_016657134.1 PREDICTED: odorant receptor 43b-like [Acyrthosiphon pisum]
XP_016656008.1 PREDICTED: odorant receptor 42a-like [Acyrthosiphon pisum]
XP_016661676.1 PREDICTED: odorant receptor 33b-like isoform X2 [Acyrthosiphon pisum]
XP_016661674.1 PREDICTED: odorant receptor 33b-like isoform X1 [Acyrthosiphon pisum]
XP_016661271.1 PREDICTED: odorant receptor 46a-like [Acyrthosiphon pisum]
XP_016660259.1 PREDICTED: odorant receptor 46a-like [Acyrthosiphon pisum]
XP_008188009.1 PREDICTED: odorant receptor coreceptor isoform X2 [Acyrthosiphon pisum]
XP_003245950.2 PREDICTED: odorant receptor 22c-like [Acyrthosiphon pisum]
XP_008180123.1 PREDICTED: odorant receptor 46a-like [Acyrthosiphon pisum]
XP_008180122.1 PREDICTED: odorant receptor 46a-like [Acyrthosiphon pisum]
XP_003247866.1 PREDICTED: odorant receptor coreceptor isoform X2 [Acyrthosiphon pisum]
XP_001951646.2 PREDICTED: odorant receptor coreceptor isoform X1 [Acyrthosiphon pisum]
JAS00759.1 odorant receptor 67a isoform x3, partial [Triatoma infestans]
JAR97008.1 odorant receptor 67a isoform x3, partial [Triatoma infestans]
JAR97007.1 odorant receptor 85b-like protein, partial [Triatoma infestans]
JAQ10980.1 Gustatory and odorant receptor 63a [Lygus hesperus]
JAQ09885.1 Gustatory and odorant receptor 63a [Lygus hesperus]
JAQ07686.1 Odorant receptor 43a, partial [Lygus hesperus]
JAQ07217.1 Gustatory and odorant receptor 24, partial [Lygus hesperus]
JAQ01863.1 Gustatory and odorant receptor 22 [Lygus hesperus]
JAQ00986.1 Gustatory and odorant receptor 22, partial [Lygus hesperus]
JAP96695.1 Gustatory and odorant receptor 63a [Lygus hesperus]
XP_015378374.1 PREDICTED: odorant receptor coreceptor-like [Diuraphis noxia]
XP_015371514.1 PREDICTED: odorant receptor coreceptor-like [Diuraphis noxia]
XP_015367780.1 PREDICTED: odorant receptor 46a, isoform B-like [Diuraphis noxia]
XP_015367779.1 PREDICTED: odorant receptor 46a, isoform B-like [Diuraphis noxia]
XP_015367764.1 PREDICTED: odorant receptor 22c-like [Diuraphis noxia]
XP_015379800.1 PREDICTED: odorant receptor 85b-like [Diuraphis noxia]
ALV87636.1 odorant receptor 21, partial [Drosicha corpulenta]
ALV87635.1 odorant receptor 20 [Drosicha corpulenta]
ALV87634.1 odorant receptor 19 [Drosicha corpulenta]
ALV87633.1 odorant receptor 18 [Drosicha corpulenta]
ALV87632.1 odorant receptor 17 [Drosicha corpulenta]
ALV87631.1 odorant receptor 16 [Drosicha corpulenta]
ALV87630.1 odorant receptor 15 [Drosicha corpulenta]
ALV87629.1 odorant receptor 14 [Drosicha corpulenta]
ALV87628.1 odorant receptor 13 [Drosicha corpulenta]
ALV87627.1 odorant receptor 12 [Drosicha corpulenta]
ALV87626.1 odorant receptor 11, partial [Drosicha corpulenta]
ALV87625.1 odorant receptor 10 [Drosicha corpulenta]
ALV87624.1 odorant receptor 9 [Drosicha corpulenta]
ALV87623.1 odorant receptor 8 [Drosicha corpulenta]
ALV87622.1 odorant receptor 7, partial [Drosicha corpulenta]
ALV87621.1 odorant receptor 6 [Drosicha corpulenta]
ALV87620.1 odorant receptor 5 [Drosicha corpulenta]
ALV87619.1 odorant receptor 4 [Drosicha corpulenta]
ALV87618.1 odorant receptor 3, partial [Drosicha corpulenta]
ALV87617.1 odorant receptor 2 [Drosicha corpulenta]
ALV87616.1 odorant receptor 1, partial [Drosicha corpulenta]
JAG43498.1 Putative odorant receptor 94a, partial [Lygus hesperus]
JAG41824.1 Odorant receptor 47a, partial [Lygus hesperus]
JAG41107.1 Odorant receptor 2a, partial [Lygus hesperus]
JAG40752.1 Gustatory and odorant receptor 24 [Lygus hesperus]
JAG40750.1 Gustatory and odorant receptor 24 [Lygus hesperus]
JAG40749.1 Gustatory and odorant receptor 24 [Lygus hesperus]
JAG40748.1 Gustatory and odorant receptor 24 [Lygus hesperus]
JAG40747.1 Gustatory and odorant receptor 24 [Lygus hesperus]
JAG40426.1 Gustatory and odorant receptor 22, partial [Lygus hesperus]
JAG40001.1 Putative odorant receptor 85a, partial [Lygus hesperus]
JAG39645.1 Putative odorant receptor 67c, partial [Lygus hesperus]
JAG38999.1 Gustatory and odorant receptor 24 [Lygus hesperus]
JAG32960.1 Odorant receptor 33a, partial [Lygus hesperus]
JAG32671.1 Odorant receptor 2a [Lygus hesperus]
JAG32670.1 Odorant receptor 2a [Lygus hesperus]
JAG31132.1 Putative odorant receptor 45a, partial [Lygus hesperus]
JAG29494.1 Putative odorant receptor 67a, partial [Lygus hesperus]
JAG27514.1 Odorant receptor 43a [Lygus hesperus]
JAG27513.1 Odorant receptor 43a [Lygus hesperus]
JAG27177.1 Gustatory and odorant receptor 63a [Lygus hesperus]
JAG26035.1 Gustatory and odorant receptor 7, partial [Lygus hesperus]
JAG25733.1 Putative odorant receptor 71a [Lygus hesperus]
JAG25732.1 Putative odorant receptor 71a, partial [Lygus hesperus]
JAG24684.1 Odorant receptor 43a [Lygus hesperus]
JAG24503.1 Odorant receptor 43a [Lygus hesperus]
JAG22370.1 Putative odorant receptor 83a, partial [Lygus hesperus]
JAG21157.1 Putative odorant receptor 67a, partial [Lygus hesperus]
JAG20549.1 Gustatory and odorant receptor 22, partial [Lygus hesperus]
JAG17371.1 Gustatory and odorant receptor 63a, partial [Lygus hesperus]
JAG16521.1 Putative odorant receptor 67c, partial [Lygus hesperus]
JAG16517.1 Gustatory and odorant receptor 22 [Lygus hesperus]
JAG16334.1 Gustatory and odorant receptor 24 [Lygus hesperus]
JAG12156.1 Odorant receptor 33b, partial [Lygus hesperus]
JAG10388.1 Gustatory and odorant receptor 22 [Lygus hesperus]
JAG10387.1 Gustatory and odorant receptor 22 [Lygus hesperus]
JAG10386.1 Gustatory and odorant receptor 22 [Lygus hesperus]
JAG10385.1 Gustatory and odorant receptor 22 [Lygus hesperus]
JAG09910.1 Odorant receptor 43a, partial [Lygus hesperus]
JAG08808.1 Putative odorant receptor 71a [Lygus hesperus]
JAG08295.1 Putative odorant receptor 49a, partial [Lygus hesperus]
JAG07219.1 Odorant receptor 43a, partial [Lygus hesperus]
JAG03231.1 Putative odorant receptor 92a, partial [Lygus hesperus]
JAG00762.1 Putative odorant receptor 67a, partial [Lygus hesperus]
AIW42735.1 odorant receptor coreceptor [Cimex lectularius]
AYN71383.1 odorant receptor 13, partial [Oedaleus infernalis]
AYN71382.1 odorant receptor 12, partial [Oedaleus infernalis]
AYN71381.1 odorant receptor 11, partial [Oedaleus infernalis]
AYN71380.1 odorant receptor 10, partial [Oedaleus infernalis]
AYN71379.1 odorant receptor 9, partial [Oedaleus infernalis]
AYN71378.1 odorant receptor 8, partial [Oedaleus infernalis]
AYN71377.1 odorant receptor 6, partial [Oedaleus infernalis]
AYN71376.1 odorant receptor 5, partial [Oedaleus infernalis]
AYN71375.1 odorant receptor 4, partial [Oedaleus infernalis]
AYN71374.1 odorant receptor 3, partial [Oedaleus infernalis]
AYN71373.1 odorant receptor 2, partial [Oedaleus infernalis]
AYN71372.1 odorant receptor 1, partial [Oedaleus infernalis]
ASM47189.1 odorant receptor 119, partial [Schistocerca gregaria]
ASM47188.1 odorant receptor 118, partial [Schistocerca gregaria]
ASM47187.1 odorant receptor 117 [Schistocerca gregaria]
ASM47186.1 odorant receptor 116, partial [Schistocerca gregaria]
ASM47185.1 odorant receptor 115, partial [Schistocerca gregaria]
ASM47184.1 odorant receptor 114 [Schistocerca gregaria]
ASM47183.1 odorant receptor 113, partial [Schistocerca gregaria]
ASM47182.1 odorant receptor 112, partial [Schistocerca gregaria]
ASM47181.1 odorant receptor 111, partial [Schistocerca gregaria]
ASM47180.1 odorant receptor 110, partial [Schistocerca gregaria]
ASM47179.1 odorant receptor 109, partial [Schistocerca gregaria]
ASM47178.1 odorant receptor 108, partial [Schistocerca gregaria]
ASM47177.1 odorant receptor 107, partial [Schistocerca gregaria]
ASM47176.1 odorant receptor 106, partial [Schistocerca gregaria]
ASM47175.1 odorant receptor 105, partial [Schistocerca gregaria]
ASM47174.1 odorant receptor 104, partial [Schistocerca gregaria]
ASM47173.1 odorant receptor 103, partial [Schistocerca gregaria]
ASM47172.1 odorant receptor 102, partial [Schistocerca gregaria]
ASM47171.1 odorant receptor 101, partial [Schistocerca gregaria]
ASM47170.1 odorant receptor 100, partial [Schistocerca gregaria]
ASM47169.1 odorant receptor 99, partial [Schistocerca gregaria]
ASM47168.1 odorant receptor 98, partial [Schistocerca gregaria]
ASM47167.1 odorant receptor 97, partial [Schistocerca gregaria]
ASM47166.1 odorant receptor 96, partial [Schistocerca gregaria]
ASM47165.1 odorant receptor 95, partial [Schistocerca gregaria]
ASM47164.1 odorant receptor 94, partial [Schistocerca gregaria]
ASM47163.1 odorant receptor 93 [Schistocerca gregaria]
ASM47162.1 odorant receptor 92, partial [Schistocerca gregaria]
ASM47161.1 odorant receptor 91, partial [Schistocerca gregaria]
ASM47160.1 odorant receptor 90, partial [Schistocerca gregaria]
ASM47159.1 odorant receptor 89, partial [Schistocerca gregaria]
ASM47158.1 odorant receptor 88, partial [Schistocerca gregaria]
ASM47157.1 odorant receptor 87, partial [Schistocerca gregaria]
ASM47156.1 odorant receptor 86, partial [Schistocerca gregaria]
ASM47155.1 odorant receptor 85, partial [Schistocerca gregaria]
ASM47154.1 odorant receptor 84, partial [Schistocerca gregaria]
ASM47153.1 odorant receptor 83, partial [Schistocerca gregaria]
ASM47152.1 odorant receptor 82, partial [Schistocerca gregaria]
ASM47151.1 odorant receptor 81, partial [Schistocerca gregaria]
ASM47150.1 odorant receptor 80, partial [Schistocerca gregaria]
ASM47149.1 odorant receptor 79, partial [Schistocerca gregaria]
ASM47148.1 odorant receptor 78, partial [Schistocerca gregaria]
ASM47147.1 odorant receptor 77, partial [Schistocerca gregaria]
ASM47146.1 odorant receptor 76, partial [Schistocerca gregaria]
ASM47145.1 odorant receptor 75, partial [Schistocerca gregaria]
ASM47144.1 odorant receptor 74 [Schistocerca gregaria]
ASM47143.1 odorant receptor 73, partial [Schistocerca gregaria]
ASM47142.1 odorant receptor 72, partial [Schistocerca gregaria]
ASM47141.1 odorant receptor 71 [Schistocerca gregaria]
ASM47140.1 odorant receptor 70 [Schistocerca gregaria]
ASM47139.1 odorant receptor 69, partial [Schistocerca gregaria]
ASM47138.1 odorant receptor 68, partial [Schistocerca gregaria]
ASM47137.1 odorant receptor 67 [Schistocerca gregaria]
ASM47136.1 odorant receptor 66 [Schistocerca gregaria]
ASM47135.1 odorant receptor 65 [Schistocerca gregaria]
ASM47134.1 odorant receptor 64, partial [Schistocerca gregaria]
ASM47133.1 odorant receptor 63, partial [Schistocerca gregaria]
ASM47132.1 odorant receptor 62, partial [Schistocerca gregaria]
ASM47131.1 odorant receptor 61, partial [Schistocerca gregaria]
ASM47130.1 odorant receptor 60, partial [Schistocerca gregaria]
ASM47129.1 odorant receptor 59, partial [Schistocerca gregaria]
ASM47128.1 odorant receptor 58, partial [Schistocerca gregaria]
ASM47127.1 odorant receptor 57, partial [Schistocerca gregaria]
ASM47126.1 odorant receptor 56, partial [Schistocerca gregaria]
ASM47125.1 odorant receptor 55, partial [Schistocerca gregaria]
ASM47124.1 odorant receptor 54 [Schistocerca gregaria]
ASM47123.1 odorant receptor 53, partial [Schistocerca gregaria]
ASM47122.1 odorant receptor 52, partial [Schistocerca gregaria]
ASM47121.1 odorant receptor 51, partial [Schistocerca gregaria]
ASM47120.1 odorant receptor 50, partial [Schistocerca gregaria]
ASM47119.1 odorant receptor 49 [Schistocerca gregaria]
ASM47118.1 odorant receptor 48, partial [Schistocerca gregaria]
ASM47117.1 odorant receptor 47 [Schistocerca gregaria]
ASM47116.1 odorant receptor 46, partial [Schistocerca gregaria]
ASM47115.1 odorant receptor 45 [Schistocerca gregaria]
ASM47114.1 odorant receptor 44, partial [Schistocerca gregaria]
ASM47113.1 odorant receptor 43 [Schistocerca gregaria]
ASM47112.1 odorant receptor 42 [Schistocerca gregaria]
ASM47111.1 odorant receptor 41, partial [Schistocerca gregaria]
ASM47110.1 odorant receptor 40, partial [Schistocerca gregaria]
ASM47109.1 odorant receptor 39 [Schistocerca gregaria]
ASM47108.1 odorant receptor 38, partial [Schistocerca gregaria]
ASM47107.1 odorant receptor 37, partial [Schistocerca gregaria]
ASM47106.1 odorant receptor 36, partial [Schistocerca gregaria]
ASM47105.1 odorant receptor 35, partial [Schistocerca gregaria]
ASM47104.1 odorant receptor 34, partial [Schistocerca gregaria]
ASM47103.1 odorant receptor 33, partial [Schistocerca gregaria]
ASM47102.1 odorant receptor 32, partial [Schistocerca gregaria]
ASM47101.1 odorant receptor 31, partial [Schistocerca gregaria]
ASM47100.1 odorant receptor 30, partial [Schistocerca gregaria]
ASM47099.1 odorant receptor 29, partial [Schistocerca gregaria]
ASM47098.1 odorant receptor 28 [Schistocerca gregaria]
ASM47097.1 odorant receptor 27, partial [Schistocerca gregaria]
ASM47096.1 odorant receptor 26, partial [Schistocerca gregaria]
ASM47095.1 odorant receptor 25, partial [Schistocerca gregaria]
ASM47094.1 odorant receptor 24, partial [Schistocerca gregaria]
ASM47093.1 odorant receptor 23, partial [Schistocerca gregaria]
ASM47092.1 odorant receptor 22, partial [Schistocerca gregaria]
ASM47091.1 odorant receptor 21, partial [Schistocerca gregaria]
ASM47090.1 odorant receptor 20, partial [Schistocerca gregaria]
ASM47089.1 odorant receptor 19, partial [Schistocerca gregaria]
ASM47088.1 odorant receptor 18, partial [Schistocerca gregaria]
ASM47087.1 odorant receptor 17 [Schistocerca gregaria]
ASM47086.1 odorant receptor 16, partial [Schistocerca gregaria]
ASM47085.1 odorant receptor 15, partial [Schistocerca gregaria]
ASM47084.1 odorant receptor 14, partial [Schistocerca gregaria]
ASM47083.1 odorant receptor 13, partial [Schistocerca gregaria]
ASM47082.1 odorant receptor 12, partial [Schistocerca gregaria]
ASM47081.1 odorant receptor 11, partial [Schistocerca gregaria]
ASM47080.1 odorant receptor 10, partial [Schistocerca gregaria]
ASM47079.1 odorant receptor 9, partial [Schistocerca gregaria]
ASM47078.1 odorant receptor 8 [Schistocerca gregaria]
ASM47077.1 odorant receptor 7, partial [Schistocerca gregaria]
ASM47076.1 odorant receptor 6, partial [Schistocerca gregaria]
ASM47075.1 odorant receptor 5, partial [Schistocerca gregaria]
ASM47074.1 odorant receptor 4, partial [Schistocerca gregaria]
ASM47073.1 odorant receptor 3, partial [Schistocerca gregaria]
ASM47072.1 odorant receptor 2, partial [Schistocerca gregaria]
ASM47071.1 odorant receptor 1, partial [Schistocerca gregaria]
ALD51504.1 odorant receptor co [Locusta migratoria]
ALD51503.1 odorant receptor 50 [Locusta migratoria]
ALD51502.1 odorant receptor 62 [Locusta migratoria]
ALD51501.1 odorant receptor 5 [Locusta migratoria]
ALD51500.1 odorant receptor 94 [Locusta migratoria]
ALD51499.1 odorant receptor 34 [Locusta migratoria]
ALD51498.1 odorant receptor 77 [Locusta migratoria]
ALD51497.1 odorant receptor 64 [Locusta migratoria]
ALD51496.1 odorant receptor 75 [Locusta migratoria]
ALD51495.1 odorant receptor 72 [Locusta migratoria]
ALD51494.1 odorant receptor 71 [Locusta migratoria]
ALD51493.1 odorant receptor 110 [Locusta migratoria]
ALD51492.1 odorant receptor 118 [Locusta migratoria]
ALD51491.1 odorant receptor 35 [Locusta migratoria]
ALD51490.1 odorant receptor 29, partial [Locusta migratoria]
ALD51489.1 odorant receptor 121, partial [Locusta migratoria]
ALD51488.1 odorant receptor 11 [Locusta migratoria]
ALD51487.1 odorant receptor 60 [Locusta migratoria]
ALD51486.1 odorant receptor 51 [Locusta migratoria]
ALD51485.1 odorant receptor 124 [Locusta migratoria]
ALD51484.1 odorant receptor 13 [Locusta migratoria]
ALD51483.1 odorant receptor 119 [Locusta migratoria]
ALD51482.1 odorant receptor 88 [Locusta migratoria]
ALD51481.1 odorant receptor 24 [Locusta migratoria]
ALD51480.1 odorant receptor 55 [Locusta migratoria]
ALD51479.1 odorant receptor 22 [Locusta migratoria]
ALD51478.1 odorant receptor 12, partial [Locusta migratoria]
ALD51477.1 odorant receptor 81, partial [Locusta migratoria]
ALD51476.1 odorant receptor 57 [Locusta migratoria]
ALD51475.1 odorant receptor 98, partial [Locusta migratoria]
ALD51474.1 odorant receptor 109, partial [Locusta migratoria]
ALD51473.1 odorant receptor 65, partial [Locusta migratoria]
ALD51472.1 odorant receptor 82, partial [Locusta migratoria]
ALD51471.1 odorant receptor 27 [Locusta migratoria]
ALD51470.1 odorant receptor 68 [Locusta migratoria]
ALD51469.1 odorant receptor 67 [Locusta migratoria]
ALD51468.1 odorant receptor 20 [Locusta migratoria]
ALD51467.1 odorant receptor 76 [Locusta migratoria]
ALD51466.1 odorant receptor 116, partial [Locusta migratoria]
ALD51465.1 odorant receptor 21, partial [Locusta migratoria]
ALD51464.1 odorant receptor 10 [Locusta migratoria]
ALD51463.1 odorant receptor 37 [Locusta migratoria]
ALD51462.1 odorant receptor 42 [Locusta migratoria]
ALD51461.1 odorant receptor 58 [Locusta migratoria]
ALD51460.1 odorant receptor 17 [Locusta migratoria]
ALD51459.1 odorant receptor 23, partial [Locusta migratoria]
ALD51458.1 odorant receptor 15, partial [Locusta migratoria]
ALD51457.1 odorant receptor 43, partial [Locusta migratoria]
ALD51456.1 odorant receptor 38 [Locusta migratoria]
ALD51455.1 odorant receptor 93 [Locusta migratoria]
ALD51454.1 odorant receptor 99 [Locusta migratoria]
ALD51453.1 odorant receptor 114, partial [Locusta migratoria]
ALD51452.1 odorant receptor 53, partial [Locusta migratoria]
ALD51451.1 odorant receptor 86 [Locusta migratoria]
ALD51450.1 odorant receptor 91, partial [Locusta migratoria]
ALD51449.1 odorant receptor 56 [Locusta migratoria]
ALD51448.1 odorant receptor 6 [Locusta migratoria]
ALD51447.1 odorant receptor 59, partial [Locusta migratoria]
ALD51446.1 odorant receptor 9, partial [Locusta migratoria]
ALD51445.1 odorant receptor 101, partial [Locusta migratoria]
ALD51444.1 odorant receptor 73 [Locusta migratoria]
ALD51443.1 odorant receptor 80 [Locusta migratoria]
ALD51442.1 odorant receptor 28, partial [Locusta migratoria]
ALD51441.1 odorant receptor 89, partial [Locusta migratoria]
ALD51440.1 odorant receptor 30, partial [Locusta migratoria]
ALD51439.1 odorant receptor 111, partial [Locusta migratoria]
ALD51438.1 odorant receptor 14, partial [Locusta migratoria]
ALD51437.1 odorant receptor 113, partial [Locusta migratoria]
ALD51436.1 odorant receptor 115, partial [Locusta migratoria]
ALD51435.1 odorant receptor 69, partial [Locusta migratoria]
ALD51434.1 odorant receptor 132, partial [Locusta migratoria]
ALD51433.1 odorant receptor 128, partial [Locusta migratoria]
ALD51432.1 odorant receptor 7 [Locusta migratoria]
ALD51431.1 odorant receptor 18, partial [Locusta migratoria]
ALD51430.1 odorant receptor 122 [Locusta migratoria]
ALD51429.1 odorant receptor 19, partial [Locusta migratoria]
ALD51428.1 odorant receptor 25, partial [Locusta migratoria]
ALD51427.1 odorant receptor 117, partial [Locusta migratoria]
ALD51426.1 odorant receptor 135, partial [Locusta migratoria]
ALD51425.1 odorant receptor 26, partial [Locusta migratoria]
ALD51424.1 odorant receptor 134, partial [Locusta migratoria]
ALD51423.1 odorant receptor 140, partial [Locusta migratoria]
ALD51422.1 odorant receptor 32, partial [Locusta migratoria]
ALD51421.1 odorant receptor 127 [Locusta migratoria]
ALD51420.1 odorant receptor 78, partial [Locusta migratoria]
ALD51419.1 odorant receptor 136, partial [Locusta migratoria]
ALD51418.1 odorant receptor 79, partial [Locusta migratoria]
ALD51417.1 odorant receptor 137, partial [Locusta migratoria]
ALD51416.1 odorant receptor 54, partial [Locusta migratoria]
ALD51415.1 odorant receptor 131 [Locusta migratoria]
ALD51414.1 odorant receptor 33 [Locusta migratoria]
ALD51413.1 odorant receptor 104 [Locusta migratoria]
ALD51412.1 odorant receptor 139, partial [Locusta migratoria]
ALD51411.1 odorant receptor 44 [Locusta migratoria]
ALD51410.1 odorant receptor 106, partial [Locusta migratoria]
ALD51409.1 odorant receptor 1 [Locusta migratoria]
ALD51408.1 odorant receptor 41 [Locusta migratoria]
ALD51407.1 odorant receptor 102 [Locusta migratoria]
ALD51406.1 odorant receptor 105 [Locusta migratoria]
ALD51405.1 odorant receptor 2 [Locusta migratoria]
ALD51404.1 odorant receptor 108 [Locusta migratoria]
ALD51403.1 odorant receptor 107 [Locusta migratoria]
ALD51402.1 odorant receptor 70 [Locusta migratoria]
ALD51401.1 odorant receptor 66, partial [Locusta migratoria]
ALD51400.1 odorant receptor 112 [Locusta migratoria]
ALD51399.1 odorant receptor 8 [Locusta migratoria]
ALD51398.1 odorant receptor 129 [Locusta migratoria]
ALD51397.1 odorant receptor 92, partial [Locusta migratoria]
ALD51396.1 odorant receptor 123 [Locusta migratoria]
ALD51395.1 odorant receptor 130 [Locusta migratoria]
ALD51394.1 odorant receptor 95 [Locusta migratoria]
ALD51393.1 odorant receptor 83 [Locusta migratoria]
ALD51392.1 odorant receptor 97 [Locusta migratoria]
ALD51391.1 odorant receptor 36 [Locusta migratoria]
ALD51390.1 odorant receptor 141, partial [Locusta migratoria]
ALD51389.1 odorant receptor 4, partial [Locusta migratoria]
ALD51388.1 odorant receptor 85, partial [Locusta migratoria]
ALD51387.1 odorant receptor 49 [Locusta migratoria]
ALD51386.1 odorant receptor 126 [Locusta migratoria]
ALD51385.1 odorant receptor 46 [Locusta migratoria]
ALD51384.1 odorant receptor 61 [Locusta migratoria]
ALD51383.1 odorant receptor 31 [Locusta migratoria]
ALD51382.1 odorant receptor 90 [Locusta migratoria]
ALD51381.1 odorant receptor 48 [Locusta migratoria]
ALD51380.1 odorant receptor 84 [Locusta migratoria]
ALD51379.1 odorant receptor 63, partial [Locusta migratoria]
ALD51378.1 odorant receptor 3 [Locusta migratoria]
ALD51377.1 odorant receptor 133 [Locusta migratoria]
ALD51376.1 odorant receptor 87, partial [Locusta migratoria]
ALD51375.1 odorant receptor 103 [Locusta migratoria]
ALD51374.1 odorant receptor 45 [Locusta migratoria]
ALD51373.1 odorant receptor 39 [Locusta migratoria]
ALD51372.1 odorant receptor 120 [Locusta migratoria]
ALD51371.1 odorant receptor 96, partial [Locusta migratoria]
ALD51370.1 odorant receptor 16 [Locusta migratoria]
ALD51369.1 odorant receptor 52 [Locusta migratoria]
ALD51368.1 odorant receptor 138, partial [Locusta migratoria]
ALD51367.1 odorant receptor 47 [Locusta migratoria]
ALD51335.1 odorant receptor 74 [Locusta migratoria]
ALD51334.1 odorant receptor 40, partial [Locusta migratoria]
ALD51333.1 odorant receptor 125, partial [Locusta migratoria]
AHB17948.1 odorant receptor 6 [Locusta migratoria]
AHB17947.1 odorant receptor 5 [Locusta migratoria]
AFL03413.1 odorant receptor 2 [Locusta migratoria]
AFL03412.1 odorant receptor 1 [Locusta migratoria]
AGK25860.1 odorant receptor 4 [Locusta migratoria]
AGK25859.1 odorant receptor 3 [Locusta migratoria]
XP_015840240.1 PREDICTED: odorant receptor 85f-like [Tribolium castaneum]
XP_015839920.1 PREDICTED: odorant receptor 45b isoform X2 [Tribolium castaneum]
XP_008200336.2 PREDICTED: odorant receptor 49b-like isoform X2 [Tribolium castaneum]
XP_008200335.2 PREDICTED: odorant receptor 49b-like isoform X1 [Tribolium castaneum]
XP_015839614.1 PREDICTED: odorant receptor 22b-like [Tribolium castaneum]
XP_015839550.1 PREDICTED: odorant receptor 2a-like [Tribolium castaneum]
XP_969312.2 PREDICTED: odorant receptor 4 [Tribolium castaneum]
XP_015839549.1 PREDICTED: odorant receptor 4 isoform X2 [Tribolium castaneum]
XP_008198795.2 PREDICTED: odorant receptor 4 isoform X1 [Tribolium castaneum]
XP_015839548.1 PREDICTED: odorant receptor 2a-like [Tribolium castaneum]
XP_015839538.1 PREDICTED: odorant receptor 22c-like isoform X2 [Tribolium castaneum]
XP_015839537.1 PREDICTED: odorant receptor 22c-like isoform X1 [Tribolium castaneum]
XP_015839443.1 PREDICTED: odorant receptor Or1-like [Tribolium castaneum]
XP_015839440.1 PREDICTED: odorant receptor 43a-like [Tribolium castaneum]
XP_015839347.1 PREDICTED: odorant receptor 4 isoform X3 [Tribolium castaneum]
XP_008197943.2 PREDICTED: odorant receptor 4 isoform X1 [Tribolium castaneum]
XP_015839344.1 PREDICTED: odorant receptor 49a-like [Tribolium castaneum]
XP_015839335.1 PREDICTED: odorant receptor 67c-like isoform X2 [Tribolium castaneum]
XP_015839334.1 PREDICTED: odorant receptor 67c-like isoform X1 [Tribolium castaneum]
XP_015839329.1 PREDICTED: odorant receptor 67c-like [Tribolium castaneum]
XP_015839328.1 PREDICTED: odorant receptor 85b-like [Tribolium castaneum]
XP_008198276.2 PREDICTED: odorant receptor 43a [Tribolium castaneum]
XP_015839178.1 PREDICTED: odorant receptor 94a [Tribolium castaneum]
XP_015839074.1 PREDICTED: odorant receptor Or1 [Tribolium castaneum]
XP_015838991.1 PREDICTED: odorant receptor 67c-like isoform X2 [Tribolium castaneum]
XP_015838990.1 PREDICTED: odorant receptor 67c-like isoform X1 [Tribolium castaneum]
XP_015838987.1 PREDICTED: odorant receptor 49a-like isoform X3 [Tribolium castaneum]
XP_015838983.1 PREDICTED: putative odorant receptor 85d isoform X2 [Tribolium castaneum]
XP_015838982.1 PREDICTED: odorant receptor 67c-like isoform X1 [Tribolium castaneum]
XP_015838678.1 PREDICTED: odorant receptor Or1 isoform X2 [Tribolium castaneum]
XP_015838677.1 PREDICTED: odorant receptor Or1 isoform X1 [Tribolium castaneum]
XP_015838588.1 PREDICTED: odorant receptor 22c-like [Tribolium castaneum]
XP_015838561.1 PREDICTED: odorant receptor 4 isoform X2 [Tribolium castaneum]
XP_015838560.1 PREDICTED: odorant receptor 4 isoform X1 [Tribolium castaneum]
XP_015838558.1 PREDICTED: odorant receptor 85b-like [Tribolium castaneum]
XP_015838474.1 PREDICTED: odorant receptor 94a-like [Tribolium castaneum]
XP_015838473.1 PREDICTED: odorant receptor 85a-like [Tribolium castaneum]
XP_015838472.1 PREDICTED: odorant receptor 94b-like [Tribolium castaneum]
XP_015838471.1 PREDICTED: odorant receptor 98a-like [Tribolium castaneum]
XP_015838470.1 PREDICTED: odorant receptor 22c-like [Tribolium castaneum]
XP_015838294.1 PREDICTED: putative odorant receptor 85e [Tribolium castaneum]
XP_015838135.1 PREDICTED: odorant receptor 23a [Tribolium castaneum]
XP_015838120.1 PREDICTED: odorant receptor Or2 [Tribolium castaneum]
XP_015838114.1 PREDICTED: odorant receptor Or1-like [Tribolium castaneum]
XP_015838111.1 PREDICTED: odorant receptor Or1 [Tribolium castaneum]
XP_015838109.1 PREDICTED: odorant receptor 4 isoform X7 [Tribolium castaneum]
XP_015838105.1 PREDICTED: putative odorant receptor 71a isoform X4 [Tribolium castaneum]
XP_015838104.1 PREDICTED: putative odorant receptor 71a isoform X4 [Tribolium castaneum]
XP_015838103.1 PREDICTED: putative odorant receptor 71a isoform X3 [Tribolium castaneum]
XP_015838102.1 PREDICTED: odorant receptor Or1 isoform X2 [Tribolium castaneum]
XP_015838101.1 PREDICTED: odorant receptor Or1 isoform X1 [Tribolium castaneum]
XP_015838100.1 PREDICTED: odorant receptor Or1 isoform X1 [Tribolium castaneum]
XP_015838099.1 PREDICTED: odorant receptor Or1 isoform X1 [Tribolium castaneum]
XP_015838098.1 PREDICTED: odorant receptor Or1 [Tribolium castaneum]
XP_015838097.1 PREDICTED: odorant receptor 46a, isoform A-like [Tribolium castaneum]
XP_008197157.2 PREDICTED: odorant receptor Or1-like [Tribolium castaneum]
XP_015838052.1 PREDICTED: odorant receptor 49b-like [Tribolium castaneum]
XP_015838051.1 PREDICTED: odorant receptor 4-like [Tribolium castaneum]
XP_015837537.1 PREDICTED: gustatory and odorant receptor 22-like [Tribolium castaneum]
XP_015836255.1 PREDICTED: odorant receptor 22c-like isoform X2 [Tribolium castaneum]
XP_015836254.1 PREDICTED: odorant receptor 22c-like isoform X1 [Tribolium castaneum]
XP_015836252.1 PREDICTED: odorant receptor 4 isoform X2 [Tribolium castaneum]
XP_015836251.1 PREDICTED: putative odorant receptor 85d isoform X1 [Tribolium castaneum]
XP_015836249.1 PREDICTED: odorant receptor 85b-like isoform X1 [Tribolium castaneum]
XP_015836248.1 PREDICTED: odorant receptor 85b-like [Tribolium castaneum]
XP_015836240.1 PREDICTED: odorant receptor 49b [Tribolium castaneum]
XP_015835233.1 PREDICTED: odorant receptor 7a-like [Tribolium castaneum]
XP_015835105.1 PREDICTED: odorant receptor 4-like [Tribolium castaneum]
XP_015834939.1 PREDICTED: odorant receptor Or1-like [Tribolium castaneum]
XP_015834785.1 PREDICTED: gustatory and odorant receptor 63a-like [Tribolium castaneum]
XP_015834400.1 PREDICTED: putative odorant receptor 71a [Tribolium castaneum]
XP_015834341.1 PREDICTED: odorant receptor Or1 [Tribolium castaneum]
XP_015834340.1 PREDICTED: odorant receptor Or1-like [Tribolium castaneum]
XP_015833778.1 PREDICTED: odorant receptor 43a-like [Tribolium castaneum]
XP_015833777.1 PREDICTED: odorant receptor 43a-like [Tribolium castaneum]
XP_015833775.1 PREDICTED: odorant receptor 43a-like isoform X1 [Tribolium castaneum]
XP_015833430.1 PREDICTED: odorant receptor 94a isoform X3 [Tribolium castaneum]
XP_015833429.1 PREDICTED: odorant receptor 94a isoform X1 [Tribolium castaneum]
XP_015833155.1 PREDICTED: odorant receptor Or1-like isoform X3 [Tribolium castaneum]
XP_015833154.1 PREDICTED: odorant receptor 4-like isoform X2 [Tribolium castaneum]
XP_015833153.1 PREDICTED: odorant receptor Or1-like isoform X1 [Tribolium castaneum]
XP_015833047.1 PREDICTED: odorant receptor 43a isoform X8 [Tribolium castaneum]
XP_015833046.1 PREDICTED: odorant receptor Or1 isoform X7 [Tribolium castaneum]
XP_015833045.1 PREDICTED: odorant receptor 49b isoform X6 [Tribolium castaneum]
XP_015833043.1 PREDICTED: odorant receptor 4 isoform X5 [Tribolium castaneum]
XP_015833042.1 PREDICTED: odorant receptor Or1 isoform X4 [Tribolium castaneum]
XP_015833041.1 PREDICTED: odorant receptor Or1 isoform X3 [Tribolium castaneum]
XP_015833040.1 PREDICTED: odorant receptor Or1 isoform X2 [Tribolium castaneum]
XP_015833039.1 PREDICTED: odorant receptor Or1 isoform X1 [Tribolium castaneum]
XP_008190617.2 PREDICTED: odorant receptor 46a, isoform B isoform X5 [Tribolium castaneum]
XP_015833034.1 PREDICTED: odorant receptor 46a, isoform B isoform X4 [Tribolium castaneum]
XP_015833033.1 PREDICTED: odorant receptor Or1 isoform X3 [Tribolium castaneum]
XP_015833032.1 PREDICTED: odorant receptor Or1 isoform X2 [Tribolium castaneum]
XP_015833031.1 PREDICTED: odorant receptor Or1 isoform X1 [Tribolium castaneum]
XP_015832943.1 PREDICTED: odorant receptor Or1 [Tribolium castaneum]
XP_015832942.1 PREDICTED: odorant receptor Or1-like [Tribolium castaneum]
XP_015832886.1 PREDICTED: odorant receptor 7a isoform X2 [Tribolium castaneum]
XP_008190484.2 PREDICTED: odorant receptor 7a isoform X1 [Tribolium castaneum]
XP_008195116.2 PREDICTED: odorant receptor Or1 [Tribolium castaneum]
XP_015832876.1 PREDICTED: odorant receptor Or1 isoform X1 [Tribolium castaneum]
XP_008195121.2 PREDICTED: odorant receptor Or1 [Tribolium castaneum]
XP_015840928.1 PREDICTED: odorant receptor 4-like isoform X3 [Tribolium castaneum]
XP_015840927.1 PREDICTED: odorant receptor 33a-like isoform X2 [Tribolium castaneum]
XP_015840926.1 PREDICTED: odorant receptor 33a-like isoform X1 [Tribolium castaneum]
XP_015840915.1 PREDICTED: odorant receptor 4-like [Tribolium castaneum]
XP_015840913.1 PREDICTED: odorant receptor Or1-like [Tribolium castaneum]
XP_015840912.1 PREDICTED: odorant receptor Or1-like isoform X3 [Tribolium castaneum]
XP_015840911.1 PREDICTED: odorant receptor 94a-like isoform X2 [Tribolium castaneum]
XP_015840910.1 PREDICTED: odorant receptor Or1-like isoform X1 [Tribolium castaneum]
XP_015840821.1 PREDICTED: odorant receptor 4 isoform X3 [Tribolium castaneum]
XP_015840820.1 PREDICTED: odorant receptor 4 isoform X2 [Tribolium castaneum]
XP_015840819.1 PREDICTED: odorant receptor 4 isoform X1 [Tribolium castaneum]
XP_015840818.1 PREDICTED: odorant receptor 4 isoform X1 [Tribolium castaneum]
XP_015840817.1 PREDICTED: odorant receptor 4 isoform X1 [Tribolium castaneum]
XP_015840816.1 PREDICTED: odorant receptor 4 isoform X1 [Tribolium castaneum]
XP_015840815.1 PREDICTED: odorant receptor 4-like [Tribolium castaneum]
XP_015840814.1 PREDICTED: odorant receptor 4-like [Tribolium castaneum]
XP_015840813.1 PREDICTED: odorant receptor Or1-like [Tribolium castaneum]
XP_015840748.1 PREDICTED: odorant receptor 45b-like [Tribolium castaneum]
XP_015840044.1 PREDICTED: odorant receptor Or1-like [Tribolium castaneum]
XP_015839897.1 PREDICTED: odorant receptor Or1-like [Tribolium castaneum]
XP_015839893.1 PREDICTED: odorant receptor Or1-like [Tribolium castaneum]
XP_015839876.1 PREDICTED: odorant receptor 94b-like [Tribolium castaneum]
XP_015839871.1 PREDICTED: odorant receptor 85b-like [Tribolium castaneum]
XP_015839868.1 PREDICTED: odorant receptor 46a, isoform A-like [Tribolium castaneum]
XP_015839865.1 PREDICTED: odorant receptor 33b-like [Tribolium castaneum]
XP_015838350.1 PREDICTED: odorant receptor 85b-like [Tribolium castaneum]
XP_008200983.2 PREDICTED: LOW QUALITY PROTEIN: odorant receptor Or1 [Tribolium castaneum]
XP_015837918.1 PREDICTED: putative odorant receptor 85d [Tribolium castaneum]
XP_015837915.1 PREDICTED: putative odorant receptor 71a [Tribolium castaneum]
XP_015837901.1 PREDICTED: odorant receptor 45a-like [Tribolium castaneum]
XP_015837682.1 PREDICTED: odorant receptor Or1 isoform X2 [Tribolium castaneum]
XP_015837679.1 PREDICTED: odorant receptor Or1 isoform X1 [Tribolium castaneum]
XP_015837672.1 PREDICTED: odorant receptor Or1-like [Tribolium castaneum]
XP_015837670.1 PREDICTED: odorant receptor Or1-like [Tribolium castaneum]
XP_008198712.1 PREDICTED: odorant receptor 4 [Tribolium castaneum]
XP_008197944.1 PREDICTED: odorant receptor 67c [Tribolium castaneum]
XP_008194693.1 PREDICTED: odorant receptor coreceptor [Tribolium castaneum]
XP_008192407.1 PREDICTED: putative odorant receptor 92a [Tribolium castaneum]
XP_008190319.1 PREDICTED: odorant receptor 4 [Tribolium castaneum]
XP_001814862.1 PREDICTED: odorant receptor 85c [Tribolium castaneum]
XP_001814661.1 PREDICTED: gustatory and odorant receptor 24 [Tribolium castaneum]
XP_001810505.1 PREDICTED: odorant receptor Or1 isoform X2 [Tribolium castaneum]
XP_966790.1 PREDICTED: odorant receptor 4 [Tribolium castaneum]
XP_967841.1 PREDICTED: putative odorant receptor 85e [Tribolium castaneum]
XP_967759.1 PREDICTED: odorant receptor 83a [Tribolium castaneum]
EFA12265.2 odorant receptor 234 [Tribolium castaneum]
EEZ99358.2 Putative odorant receptor 71a-like Protein [Tribolium castaneum]
EEZ99415.2 odorant receptor 60 [Tribolium castaneum]
EEZ99304.2 odorant receptor 48 [Tribolium castaneum]
EEZ99413.2 odorant receptor 50 [Tribolium castaneum]
EEZ99410.2 odorant receptor 40 [Tribolium castaneum]
KYB29104.1 Odorant receptor 94a-like Protein [Tribolium castaneum]
KYB29103.1 Odorant receptor 33a-like protein [Tribolium castaneum]
EEZ99310.2 odorant receptor 68 [Tribolium castaneum]
EEZ99175.2 odorant receptor 153 [Tribolium castaneum]
EFA01308.2 Putative odorant receptor 71a-like Protein [Tribolium castaneum]
KYB28927.1 Putative odorant receptor 71a-like Protein [Tribolium castaneum]
EFA01309.2 odorant receptor 6 [Tribolium castaneum]
KYB28921.1 Odorant receptor 46a, isoform A-like Protein [Tribolium castaneum]
EFA01295.2 odorant receptor 53 [Tribolium castaneum]
EFA01342.2 odorant receptor 171 [Tribolium castaneum]
EFA01388.2 odorant receptor 173 [Tribolium castaneum]
EFA12791.2 odorant receptor 152 [Tribolium castaneum]
EFA02882.2 odorant receptor 130 [Tribolium castaneum]
KYB27516.1 odorant receptor 149 [Tribolium castaneum]
EFA04561.2 odorant receptor 149 [Tribolium castaneum]
EFA05710.2 odorant receptor 73 [Tribolium castaneum]
EFA11867.2 odorant receptor 297 [Tribolium castaneum]
EFA09165.2 Odorant receptor 83a-like Protein [Tribolium castaneum]
EFA09166.2 odorant receptor 72 [Tribolium castaneum]
EFA09245.2 odorant receptor 14 [Tribolium castaneum]
EFA09138.2 odorant receptor 111 [Tribolium castaneum]
EFA09139.2 odorant receptor 108 [Tribolium castaneum]
KYB25641.1 Odorant receptor 63a-like protein [Tribolium castaneum]
EFA10799.2 odorant receptor 24 [Tribolium castaneum]
EFA10802.2 odorant receptor 340 [Tribolium castaneum]
EFA10800.2 odorant receptor 64 [Tribolium castaneum]
KYB25314.1 Putative odorant receptor 85d-like Protein [Tribolium castaneum]
EFA10775.2 odorant receptor 84 [Tribolium castaneum]
EEZ97733.2 odorant receptor 127 [Tribolium castaneum]
EFA12388.2 odorant receptor 139 [Tribolium castaneum]
EEZ97702.2 odorant receptor 187 [Tribolium castaneum]
EEZ97750.2 odorant receptor 102 [Tribolium castaneum]
KYB24944.1 Odorant receptor 30a-like protein [Tribolium castaneum]
EFA11737.2 odorant receptor 339 [Tribolium castaneum]
EFA13313.2 odorant receptor 100, partial [Tribolium castaneum]
EFA13404.1 odorant receptor 304 [Tribolium castaneum]
EFA12944.1 odorant receptor 244 [Tribolium castaneum]
EFA12943.1 odorant receptor 243 [Tribolium castaneum]
EFA12942.1 odorant receptor 242 [Tribolium castaneum]
EFA12686.1 odorant receptor 247 [Tribolium castaneum]
EFA12685.1 odorant receptor 245 [Tribolium castaneum]
EFA11920.1 odorant receptor 129 [Tribolium castaneum]
EFA11864.1 odorant receptor 295 [Tribolium castaneum]
EFA11626.1 odorant receptor 264 [Tribolium castaneum]
EFA10801.1 odorant receptor 94 [Tribolium castaneum]
EFA10798.1 odorant receptor 23 [Tribolium castaneum]
EFA10779.1 odorant receptor 76 [Tribolium castaneum]
EFA10778.1 odorant receptor 78 [Tribolium castaneum]
EFA10777.1 odorant receptor 79 [Tribolium castaneum]
EFA10776.1 odorant receptor 80 [Tribolium castaneum]
EFA10774.1 odorant receptor 86 [Tribolium castaneum]
EFA10773.1 odorant receptor 87 [Tribolium castaneum]
EFA10772.1 odorant receptor 88 [Tribolium castaneum]
EFA10703.1 odorant receptor [Tribolium castaneum]
EFA10701.1 odorant receptor 77 [Tribolium castaneum]
EFA10670.1 odorant receptor 95 [Tribolium castaneum]
EFA09300.1 odorant receptor 230 [Tribolium castaneum]
EFA09299.1 odorant receptor 110 [Tribolium castaneum]
EFA09298.1 odorant receptor 107 [Tribolium castaneum]
EFA09296.1 odorant receptor 105 [Tribolium castaneum]
EFA09267.1 odorant receptor 229 [Tribolium castaneum]
EFA09246.1 odorant receptor 15 [Tribolium castaneum]
EFA09237.1 odorant receptor 300 [Tribolium castaneum]
EFA09170.1 odorant receptor 16 [Tribolium castaneum]
EFA07457.1 odorant receptor 198 [Tribolium castaneum]
EFA05792.1 odorant receptor 232 [Tribolium castaneum]
EFA05727.1 odorant receptor 57 [Tribolium castaneum]
EFA05687.1 odorant receptor 1 [Tribolium castaneum]
EFA05659.1 odorant receptor 231 [Tribolium castaneum]
EFA04745.1 odorant receptor 335 [Tribolium castaneum]
EFA04744.1 odorant receptor 333 [Tribolium castaneum]
EFA04743.1 odorant receptor 332 [Tribolium castaneum]
EFA04742.1 odorant receptor 331 [Tribolium castaneum]
EFA04741.1 odorant receptor 330 [Tribolium castaneum]
EFA04740.1 odorant receptor 329 [Tribolium castaneum]
EFA04739.1 odorant receptor 328 [Tribolium castaneum]
EFA04737.1 odorant receptor 269 [Tribolium castaneum]
EFA04736.1 odorant receptor 150 [Tribolium castaneum]
EFA04733.1 odorant receptor 146 [Tribolium castaneum]
EFA04731.1 odorant receptor 144 [Tribolium castaneum]
EFA04606.1 odorant receptor 272 [Tribolium castaneum]
EFA04548.1 odorant receptor 141 [Tribolium castaneum]
EFA02959.1 odorant receptor 316 [Tribolium castaneum]
EFA02958.1 odorant receptor 315 [Tribolium castaneum]
EFA02957.1 odorant receptor 314 [Tribolium castaneum]
EFA02956.1 odorant receptor 313 [Tribolium castaneum]
EFA02955.1 odorant receptor 301 [Tribolium castaneum]
EFA02953.1 odorant receptor 278 [Tribolium castaneum]
EFA02952.1 odorant receptor 276 [Tribolium castaneum]
EFA02951.1 odorant receptor 197 [Tribolium castaneum]
EFA02950.1 odorant receptor 195 [Tribolium castaneum]
EFA02949.1 odorant receptor 165 [Tribolium castaneum]
EFA02948.1 odorant receptor 164 [Tribolium castaneum]
EFA02947.1 odorant receptor 160 [Tribolium castaneum]
EFA02946.1 odorant receptor 159 [Tribolium castaneum]
EFA02945.1 odorant receptor 136 [Tribolium castaneum]
EFA02944.1 odorant receptor 135 [Tribolium castaneum]
EFA02943.1 odorant receptor 133 [Tribolium castaneum]
EFA02942.1 odorant receptor 131 [Tribolium castaneum]
EFA02941.1 odorant receptor 93 [Tribolium castaneum]
EFA02940.1 odorant receptor 47 [Tribolium castaneum]
EFA02873.1 odorant receptor 92 [Tribolium castaneum]
EFA02867.1 odorant receptor 128 [Tribolium castaneum]
EFA02841.1 odorant receptor 277 [Tribolium castaneum]
EFA02840.1 odorant receptor 281 [Tribolium castaneum]
EFA01424.1 odorant receptor 294 [Tribolium castaneum]
EFA01423.1 odorant receptor 293 [Tribolium castaneum]
EFA01422.1 odorant receptor 292 [Tribolium castaneum]
EFA01421.1 odorant receptor 290 [Tribolium castaneum]
EFA01420.1 odorant receptor 288 [Tribolium castaneum]
EFA01419.1 odorant receptor 287 [Tribolium castaneum]
EFA01418.1 odorant receptor 286 [Tribolium castaneum]
EFA01417.1 odorant receptor 285 [Tribolium castaneum]
EFA01416.1 odorant receptor 283 [Tribolium castaneum]
EFA01415.1 odorant receptor 239 [Tribolium castaneum]
EFA01414.1 odorant receptor 238 [Tribolium castaneum]
EFA01413.1 odorant receptor 236 [Tribolium castaneum]
EFA01412.1 odorant receptor 228 [Tribolium castaneum]
EFA01411.1 odorant receptor 227 [Tribolium castaneum]
EFA01410.1 odorant receptor 226 [Tribolium castaneum]
EFA01409.1 odorant receptor 225 [Tribolium castaneum]
EFA01408.1 odorant receptor 223 [Tribolium castaneum]
EFA01407.1 odorant receptor 222 [Tribolium castaneum]
EFA01406.1 odorant receptor 221 [Tribolium castaneum]
EFA01405.1 odorant receptor 220 [Tribolium castaneum]
EFA01404.1 odorant receptor 219 [Tribolium castaneum]
EFA01403.1 odorant receptor 218 [Tribolium castaneum]
EFA01402.1 odorant receptor 217 [Tribolium castaneum]
EFA01401.1 odorant receptor 216 [Tribolium castaneum]
EFA01400.1 odorant receptor 214 [Tribolium castaneum]
EFA01399.1 odorant receptor 213 [Tribolium castaneum]
EFA01398.1 odorant receptor 211 [Tribolium castaneum]
EFA01397.1 odorant receptor 209 [Tribolium castaneum]
EFA01396.1 odorant receptor 208 [Tribolium castaneum]
EFA01395.1 odorant receptor 185 [Tribolium castaneum]
EFA01394.1 odorant receptor 184 [Tribolium castaneum]
EFA01393.1 odorant receptor 183 [Tribolium castaneum]
EFA01392.1 odorant receptor 178 [Tribolium castaneum]
EFA01391.1 odorant receptor 177 [Tribolium castaneum]
EFA01390.1 odorant receptor 175 [Tribolium castaneum]
EFA01389.1 odorant receptor 174 [Tribolium castaneum]
EFA01387.1 odorant receptor 172 [Tribolium castaneum]
EFA01347.1 odorant receptor 259 [Tribolium castaneum]
EFA01335.1 odorant receptor 25 [Tribolium castaneum]
EFA01303.1 odorant receptor 284 [Tribolium castaneum]
EFA01293.1 odorant receptor 17 [Tribolium castaneum]
EFA01255.1 odorant receptor 212 [Tribolium castaneum]
EEZ99427.1 odorant receptor 324 [Tribolium castaneum]
EEZ99426.1 odorant receptor 322 [Tribolium castaneum]
EEZ99425.1 odorant receptor 321 [Tribolium castaneum]
EEZ99424.1 odorant receptor 320 [Tribolium castaneum]
EEZ99423.1 odorant receptor 310 [Tribolium castaneum]
EEZ99422.1 odorant receptor 263 [Tribolium castaneum]
EEZ99419.1 odorant receptor 121 [Tribolium castaneum]
EEZ99416.1 odorant receptor 61 [Tribolium castaneum]
EEZ99405.1 odorant receptor 30 [Tribolium castaneum]
EEZ99350.1 odorant receptor 323 [Tribolium castaneum]
EEZ99349.1 odorant receptor 325 [Tribolium castaneum]
EEZ99312.1 odorant receptor 70 [Tribolium castaneum]
EEZ99311.1 odorant receptor 69 [Tribolium castaneum]
EEZ99303.1 odorant receptor 49 [Tribolium castaneum]
EEZ99302.1 odorant receptor 51 [Tribolium castaneum]
EEZ99301.1 odorant receptor 52 [Tribolium castaneum]
EEZ99239.1 odorant receptor 26 [Tribolium castaneum]
EEZ99230.1 odorant receptor 34 [Tribolium castaneum]
EEZ97788.1 odorant receptor 319 [Tribolium castaneum]
EEZ97787.1 odorant receptor 311 [Tribolium castaneum]
EEZ97786.1 odorant receptor 309 [Tribolium castaneum]
EEZ97785.1 odorant receptor 305 [Tribolium castaneum]
EEZ97784.1 odorant receptor 205 [Tribolium castaneum]
EEZ97783.1 odorant receptor 202 [Tribolium castaneum]
EEZ97782.1 odorant receptor 199 [Tribolium castaneum]
EEZ97781.1 odorant receptor 194 [Tribolium castaneum]
EEZ97778.1 odorant receptor 189 [Tribolium castaneum]
EEZ97777.1 odorant receptor 154 [Tribolium castaneum]
EEZ97776.1 odorant receptor 67 [Tribolium castaneum]
EEZ97754.1 odorant receptor 186 [Tribolium castaneum]
EEZ97749.1 odorant receptor 318 [Tribolium castaneum]
EEZ97743.1 odorant receptor 54 [Tribolium castaneum]
EEZ97727.1 odorant receptor 66 [Tribolium castaneum]
EEZ97726.1 odorant receptor [Tribolium castaneum]
EEZ97723.1 odorant receptor 204 [Tribolium castaneum]
EEZ97700.1 odorant receptor 191 [Tribolium castaneum]
## OBP accession numbers
XP_023704982.1 general odorant-binding protein 68-like isoform X2 [Cryptotermes secundus]
XP_023704981.1 general odorant-binding protein 68-like isoform X1 [Cryptotermes secundus]
XP_023704959.1 general odorant-binding protein 66-like [Cryptotermes secundus]
XP_023702229.1 general odorant-binding protein 71-like [Cryptotermes secundus]
XP_023727981.1 general odorant-binding protein 84a isoform X2 [Cryptotermes secundus]
XP_023727980.1 general odorant-binding protein 84a isoform X1 [Cryptotermes secundus]
XP_023725663.1 general odorant-binding protein 70 isoform X2 [Cryptotermes secundus]
XP_023725662.1 general odorant-binding protein 70 isoform X1 [Cryptotermes secundus]
XP_023725124.1 general odorant-binding protein 19d-like [Cryptotermes secundus]
XP_023722815.1 general odorant-binding protein 83a-like [Cryptotermes secundus]
XP_023722799.1 general odorant-binding protein 72-like [Cryptotermes secundus]
XP_023722798.1 general odorant-binding protein 72-like [Cryptotermes secundus]
XP_023722796.1 general odorant-binding protein 19a-like [Cryptotermes secundus]
XP_023722774.1 general odorant-binding protein 72-like [Cryptotermes secundus]
XP_023722773.1 general odorant-binding protein 72-like [Cryptotermes secundus]
XP_023722108.1 general odorant-binding protein 69a-like [Cryptotermes secundus]
XP_023722058.1 general odorant-binding protein 56d-like [Cryptotermes secundus]
XP_023722057.1 general odorant-binding protein 56d-like [Cryptotermes secundus]
XP_023719059.1 general odorant-binding protein 56a-like [Cryptotermes secundus]
PNF17860.1 General odorant-binding protein 72 [Cryptotermes secundus]
XP_021937238.1 general odorant-binding protein 83a-like [Zootermopsis nevadensis]
XP_021937237.1 general odorant-binding protein 69a-like [Zootermopsis nevadensis]
XP_021937236.1 general odorant-binding protein 83a-like [Zootermopsis nevadensis]
XP_021932167.1 general odorant-binding protein 70 isoform X2 [Zootermopsis nevadensis]
XP_021932166.1 general odorant-binding protein 70 isoform X1 [Zootermopsis nevadensis]
XP_021931617.1 general odorant-binding protein 56a-like [Zootermopsis nevadensis]
XP_021931616.1 general odorant-binding protein 56a-like [Zootermopsis nevadensis]
XP_021930874.1 general odorant-binding protein 72-like [Zootermopsis nevadensis]
XP_021930873.1 general odorant-binding protein 72-like [Zootermopsis nevadensis]
XP_021928284.1 general odorant-binding protein 56a-like [Zootermopsis nevadensis]
XP_021928282.1 general odorant-binding protein 56h-like isoform X2 [Zootermopsis nevadensis]
XP_021928281.1 general odorant-binding protein 56h-like isoform X1 [Zootermopsis nevadensis]
XP_021924930.1 general odorant-binding protein 57c isoform X2 [Zootermopsis nevadensis]
XP_021924928.1 general odorant-binding protein 84a-like isoform X3 [Zootermopsis nevadensis]
XP_021924927.1 general odorant-binding protein 84a-like isoform X2 [Zootermopsis nevadensis]
XP_021924926.1 general odorant-binding protein 84a-like isoform X1 [Zootermopsis nevadensis]
XP_021916985.1 general odorant-binding protein 84a-like [Zootermopsis nevadensis]
XP_021913274.1 putative odorant-binding protein A10 [Zootermopsis nevadensis]
XP_021913269.1 putative odorant-binding protein A10 isoform X2 [Zootermopsis nevadensis]
XP_021913268.1 putative odorant-binding protein A10 isoform X1 [Zootermopsis nevadensis]
BAU20277.1 putative odorant-binding protein, partial [Reticulitermes speratus]
BAU20276.1 putative odorant-binding protein [Reticulitermes speratus]
BAU20275.1 putative odorant-binding protein [Reticulitermes speratus]
BAU20274.1 putative odorant-binding protein, partial [Reticulitermes speratus]
BAU20273.1 putative odorant-binding protein, partial [Reticulitermes speratus]
BAU20272.1 putative odorant-binding protein, partial [Reticulitermes speratus]
BAU20271.1 putative odorant-binding protein [Reticulitermes speratus]
BAU20270.1 putative odorant-binding protein, partial [Reticulitermes speratus]
BAU20269.1 putative odorant-binding protein, partial [Reticulitermes speratus]
KDR22551.1 Putative odorant-binding protein A10 [Zootermopsis nevadensis]
KDR13658.1 General odorant-binding protein 19a [Zootermopsis nevadensis]
KDR13657.1 General odorant-binding protein 19a [Zootermopsis nevadensis]
KDR13656.1 General odorant-binding protein 19a [Zootermopsis nevadensis]
KDR13655.1 General odorant-binding protein 19a [Zootermopsis nevadensis]
KDR13203.1 General odorant-binding protein 56d [Zootermopsis nevadensis]
AGM32399.1 odorant-binding protein [Coptotermes formosanus]
ACI30687.2 odorant-binding protein [Periplaneta americana]
ACI30686.2 odorant-binding protein [Periplaneta americana]
ACI30685.1 odorant-binding protein [Periplaneta americana]
AAN15923.1 odorant-binding protein 3 precursor [Zootermopsis nevadensis]
AAN15922.1 odorant-binding protein 2 precursor [Zootermopsis nevadensis]
AAN15921.1 odorant-binding protein 1 precursor [Zootermopsis nevadensis]
sp|Q9VR94.2|OB19A_DROME RecName: Full=General odorant-binding protein 19a; Flags: Precursor
sp|Q9V938.4|OB57E_DROME RecName: Full=General odorant-binding protein 57e; Flags: Precursor
sp|P54195.2|OB28A_DROME RecName: Full=General odorant-binding protein 28a; AltName: Full=Odorant-binding protein 28a; AltName: Full=Pheromone-binding protein-related protein 5; Short=PBPRP-5; Flags: Precursor
sp|P54192.2|OB19D_DROME RecName: Full=General odorant-binding protein 19d; AltName: Full=Odorant-binding protein 19d; AltName: Full=Pheromone-binding protein-related protein 2; Short=PBPRP-2; Flags: Precursor
sp|Q9VAJ4.2|OB99A_DROME RecName: Full=General odorant-binding protein 99a; Flags: Precursor
sp|Q9VAI6.1|OB99B_DROME RecName: Full=General odorant-binding protein 99b; Flags: Precursor
sp|Q9V8Y9.2|OB56H_DROME RecName: Full=General odorant-binding protein 56h; Flags: Precursor
sp|Q9V8Y2.1|OB56A_DROME RecName: Full=General odorant-binding protein 56a; Flags: Precursor
sp|Q8SY61.2|OB56D_DROME RecName: Full=General odorant-binding protein 56d; Flags: Precursor
sp|Q9V931.1|OB57C_DROME RecName: Full=General odorant-binding protein 57c; Flags: Precursor
sp|Q8MMF9.2|OB57D_DROME RecName: Full=General odorant-binding protein 57d; Flags: Precursor
sp|P54185.2|OBA5_DROME RecName: Full=Putative odorant-binding protein A5; AltName: Full=Antennal protein 5; Flags: Precursor
sp|P54191.2|OB69A_DROME RecName: Full=General odorant-binding protein 69a; AltName: Full=Odorant-binding protein 69a; AltName: Full=Pheromone-binding protein-related protein 1; Short=PBPRP-1; Flags: Precursor
sp|P54194.1|OB84A_DROME RecName: Full=General odorant-binding protein 84a; AltName: Full=Odorant-binding protein 84a; AltName: Full=Pheromone-binding protein-related protein 4; Short=PBPRP-4; Flags: Precursor
sp|P54193.1|OB83A_DROME RecName: Full=General odorant-binding protein 83a; AltName: Full=Odorant-binding protein 83a; AltName: Full=Odorant-binding protein OS-F; AltName: Full=Pheromone-binding protein-related protein 3; Short=PBPRP-3; Flags: Precursor
AHN56427.1 Odorant-binding protein 57b, isoform B [Drosophila melanogaster]
AHN56415.1 Odorant-binding protein 56e, isoform B [Drosophila melanogaster]
AHN56414.1 Odorant-binding protein 56d, isoform B [Drosophila melanogaster]
AAM71004.3 Odorant-binding protein 50c [Drosophila melanogaster]
AHN55984.1 Odorant-binding protein 44a, isoform B [Drosophila melanogaster]
AAF57521.4 Odorant-binding protein 56c, isoform C [Drosophila melanogaster]
ADV37226.1 Odorant-binding protein 56i, isoform B [Drosophila melanogaster]
ADV37225.1 Odorant-binding protein 56h, isoform B [Drosophila melanogaster]
AAS64866.1 Odorant-binding protein 47a, isoform B [Drosophila melanogaster]
AAF58251.2 Odorant-binding protein 50e [Drosophila melanogaster]
AAM71005.2 Odorant-binding protein 50d [Drosophila melanogaster]
AAS64854.1 Odorant-binding protein 50a, isoform B [Drosophila melanogaster]
AAS64805.1 Odorant-binding protein 56c, isoform B [Drosophila melanogaster]
AAS64797.1 Odorant-binding protein 56g, isoform B [Drosophila melanogaster]
AAF57515.2 Odorant-binding protein 56h, isoform A [Drosophila melanogaster]
AAO41344.1 Odorant-binding protein 59a [Drosophila melanogaster]
AAF46891.3 Odorant-binding protein 58b [Drosophila melanogaster]
AAM71003.1 Odorant-binding protein 50b [Drosophila melanogaster]
AAM71002.1 Odorant-binding protein 50a, isoform A [Drosophila melanogaster]
AAF58810.2 Odorant-binding protein 46a [Drosophila melanogaster]
AAF58726.2 Odorant-binding protein 47a, isoform A [Drosophila melanogaster]
AAF58469.2 Odorant-binding protein 49a [Drosophila melanogaster]
AAM68544.1 Odorant-binding protein 51a [Drosophila melanogaster]
AAM68426.1 Odorant-binding protein 56b [Drosophila melanogaster]
AAM68413.1 Odorant-binding protein 56i, isoform A [Drosophila melanogaster]
AAF57516.2 Odorant-binding protein 56g, isoform A [Drosophila melanogaster]
AAM68412.1 Odorant-binding protein 56f [Drosophila melanogaster]
AAM68410.1 Odorant-binding protein 57a [Drosophila melanogaster]
AAM68409.1 Odorant-binding protein 57b, isoform A [Drosophila melanogaster]
AAM68388.1 Odorant-binding protein 57d [Drosophila melanogaster]
AAF57460.2 Odorant-binding protein 57e [Drosophila melanogaster]
AAF59126.1 Odorant-binding protein 44a, isoform A [Drosophila melanogaster]
AAF58672.1 Odorant-binding protein 47b [Drosophila melanogaster]
AAF57522.1 Odorant-binding protein 56a [Drosophila melanogaster]
AAF57520.1 Odorant-binding protein 56d, isoform A [Drosophila melanogaster]
AAF57519.1 Odorant-binding protein 56e, isoform A [Drosophila melanogaster]
AAF57467.1 Odorant-binding protein 57c [Drosophila melanogaster]
AAF46893.1 Odorant-binding protein 58d [Drosophila melanogaster]
AAF46892.1 Odorant-binding protein 58c [Drosophila melanogaster]
sp|Q27377.2|OB10_DROME RecName: Full=Putative odorant-binding protein A10; AltName: Full=Antennal protein 10; AltName: Full=OS-D protein; Flags: Precursor
sp|O02372.1|OB76A_DROME RecName: Full=General odorant-binding protein lush; Flags: Precursor
sp|Q8MKK0.1|OB57A_DROME RecName: Full=General odorant-binding protein 57a; Flags: Precursor
sp|Q8MKJ4.1|OB57B_DROME RecName: Full=General odorant-binding protein 57b; Flags: Precursor
NP_001334711.1 Odorant-binding protein 73a, isoform C [Drosophila melanogaster]
NP_001334691.1 Odorant-binding protein 85a [Drosophila melanogaster]
NP_001286632.1 Odorant-binding protein 57b, isoform B [Drosophila melanogaster]
NP_001286620.1 Odorant-binding protein 56e, isoform B [Drosophila melanogaster]
NP_001286619.1 Odorant-binding protein 56d, isoform B [Drosophila melanogaster]
NP_725387.3 Odorant-binding protein 50c [Drosophila melanogaster]
NP_001286186.1 Odorant-binding protein 44a, isoform B [Drosophila melanogaster]
NP_001287586.1 Odorant-binding protein 99a, isoform B [Drosophila melanogaster]
NP_001287190.1 Odorant-binding protein 83a, isoform C [Drosophila melanogaster]
NP_001287189.1 Odorant-binding protein 83a, isoform B [Drosophila melanogaster]
NP_728340.2 Odorant-binding protein 19c, isoform C [Drosophila melanogaster]
NP_722746.2 Odorant-binding protein 22a, isoform C [Drosophila melanogaster]
NP_001263078.1 Odorant-binding protein 99b, isoform B [Drosophila melanogaster]
NP_001263077.1 Odorant-binding protein 99c, isoform B [Drosophila melanogaster]
NP_725925.3 Odorant-binding protein 56c, isoform C [Drosophila melanogaster]
NP_728338.2 Odorant-binding protein 19a [Drosophila melanogaster]
NP_001188980.1 Odorant-binding protein 56i, isoform B [Drosophila melanogaster]
NP_001188979.1 Odorant-binding protein 56h, isoform B [Drosophila melanogaster]
NP_001097700.2 Odorant-binding protein 84a, isoform C [Drosophila melanogaster]
NP_001097628.1 Odorant-binding protein 73a, isoform B [Drosophila melanogaster]
NP_001014457.1 Odorant-binding protein 22a, isoform B [Drosophila melanogaster]
NP_995903.1 Odorant-binding protein 56g, isoform B [Drosophila melanogaster]
NP_995902.1 Odorant-binding protein 56c, isoform B [Drosophila melanogaster]
NP_995832.1 Odorant-binding protein 50a, isoform B [Drosophila melanogaster]
NP_995810.1 Odorant-binding protein 47a, isoform B [Drosophila melanogaster]
NP_725388.2 Odorant-binding protein 50d [Drosophila melanogaster]
NP_610959.2 Odorant-binding protein 50e [Drosophila melanogaster]
NP_788429.1 Odorant-binding protein 59a [Drosophila melanogaster]
NP_611448.2 Odorant-binding protein 56h, isoform A [Drosophila melanogaster]
NP_788940.1 Odorant-binding protein 19d, isoform B [Drosophila melanogaster]
NP_524039.2 Odorant-binding protein 69a [Drosophila melanogaster]
NP_611711.1 Odorant-binding protein 58d [Drosophila melanogaster]
NP_611710.1 Odorant-binding protein 58c [Drosophila melanogaster]
NP_611709.1 Odorant-binding protein 58b [Drosophila melanogaster]
NP_725973.1 Odorant-binding protein 57d [Drosophila melanogaster]
NP_725966.1 Odorant-binding protein 57a [Drosophila melanogaster]
NP_725965.1 Odorant-binding protein 57b, isoform A [Drosophila melanogaster]
NP_725929.1 Odorant-binding protein 56i, isoform A [Drosophila melanogaster]
NP_611447.1 Odorant-binding protein 56g, isoform A [Drosophila melanogaster]
NP_725926.1 Odorant-binding protein 56f [Drosophila melanogaster]
NP_611444.2 Odorant-binding protein 56d, isoform A [Drosophila melanogaster]
NP_611443.1 Odorant-binding protein 56b [Drosophila melanogaster]
NP_725436.1 Odorant-binding protein 51a [Drosophila melanogaster]
NP_725386.1 Odorant-binding protein 50b [Drosophila melanogaster]
NP_725385.1 Odorant-binding protein 50a, isoform A [Drosophila melanogaster]
NP_610812.1 Odorant-binding protein 49a [Drosophila melanogaster]
NP_610669.1 Odorant-binding protein 47b [Drosophila melanogaster]
NP_610632.1 Odorant-binding protein 47a, isoform A [Drosophila melanogaster]
NP_610574.1 Odorant-binding protein 46a [Drosophila melanogaster]
NP_651713.1 Odorant-binding protein 99b, isoform A [Drosophila melanogaster]
NP_651712.1 Odorant-binding protein 99d [Drosophila melanogaster]
NP_651711.1 Odorant-binding protein 99c, isoform A [Drosophila melanogaster]
NP_651707.1 Odorant-binding protein 99a, isoform A [Drosophila melanogaster]
NP_650945.1 Odorant-binding protein 93a [Drosophila melanogaster]
NP_731043.1 Odorant-binding protein 83g [Drosophila melanogaster]
NP_731042.1 Odorant-binding protein 83ef [Drosophila melanogaster]
NP_524242.2 Odorant-binding protein 83b [Drosophila melanogaster]
NP_523421.2 Odorant-binding protein 19d, isoform A [Drosophila melanogaster]
NP_608392.1 Odorant-binding protein 19c, isoform A [Drosophila melanogaster]
NP_573350.1 Odorant-binding protein 18a [Drosophila melanogaster]
NP_727322.1 Odorant-binding protein 8a [Drosophila melanogaster]
NP_608391.2 Odorant-binding protein 19b [Drosophila melanogaster]
NP_611488.1 Odorant-binding protein 57e [Drosophila melanogaster]
NP_649612.1 Odorant-binding protein 83cd [Drosophila melanogaster]
NP_611481.1 Odorant-binding protein 57c [Drosophila melanogaster]
NP_611445.1 Odorant-binding protein 56e, isoform A [Drosophila melanogaster]
NP_611442.1 Odorant-binding protein 56a [Drosophila melanogaster]
NP_610358.1 Odorant-binding protein 44a, isoform A [Drosophila melanogaster]
NP_524241.1 Odorant-binding protein 83a, isoform A [Drosophila melanogaster]
NP_523505.1 Odorant-binding protein 28a [Drosophila melanogaster]
NP_476990.1 Odorant-binding protein 84a, isoform A [Drosophila melanogaster]
API64958.1 Odorant-binding protein 73a, isoform C [Drosophila melanogaster]
API64931.1 Odorant-binding protein 85a [Drosophila melanogaster]
AAN09546.2 Odorant-binding protein 19c, isoform C [Drosophila melanogaster]
AHN57585.1 Odorant-binding protein 99a, isoform B [Drosophila melanogaster]
AHN57189.1 Odorant-binding protein 83a, isoform C [Drosophila melanogaster]
AHN57188.1 Odorant-binding protein 83a, isoform B [Drosophila melanogaster]
AGB96458.1 Odorant-binding protein 99b, isoform B [Drosophila melanogaster]
AGB96457.1 Odorant-binding protein 99c, isoform B [Drosophila melanogaster]
AAN10439.2 Odorant-binding protein 22a, isoform C [Drosophila melanogaster]
AAF50910.2 Odorant-binding protein 19a [Drosophila melanogaster]
ABW08613.2 Odorant-binding protein 84a, isoform C [Drosophila melanogaster]
AAS64983.2 Odorant-binding protein 73a, isoform B [Drosophila melanogaster]
AAX53590.1 Odorant-binding protein 22a, isoform B [Drosophila melanogaster]
AAO41713.1 Odorant-binding protein 19d, isoform B [Drosophila melanogaster]
AAF51929.2 Odorant-binding protein 83a, isoform A [Drosophila melanogaster]
AAF56912.2 Odorant-binding protein 99a, isoform A [Drosophila melanogaster]
AAF55855.2 Odorant-binding protein 93a [Drosophila melanogaster]
AAN13232.1 Odorant-binding protein 83g [Drosophila melanogaster]
AAF51918.2 Odorant-binding protein 83ef [Drosophila melanogaster]
AAF51919.2 Odorant-binding protein 83cd [Drosophila melanogaster]
AAF50909.2 Odorant-binding protein 19b [Drosophila melanogaster]
AAF48918.2 Odorant-binding protein 18a [Drosophila melanogaster]
AAF46463.2 Odorant-binding protein 8a [Drosophila melanogaster]
AAF56921.1 Odorant-binding protein 99b, isoform A [Drosophila melanogaster]
AAF56920.1 Odorant-binding protein 99d [Drosophila melanogaster]
AAF56918.1 Odorant-binding protein 99c, isoform A [Drosophila melanogaster]
AAF54039.1 Odorant-binding protein 84a, isoform A [Drosophila melanogaster]
AAF52525.1 Odorant-binding protein 28a [Drosophila melanogaster]
AAF51928.1 Odorant-binding protein 83b [Drosophila melanogaster]
AAF50908.1 Odorant-binding protein 19c, isoform A [Drosophila melanogaster]
AAF50907.1 Odorant-binding protein 19d, isoform A [Drosophila melanogaster]
AAF49925.1 Odorant-binding protein 69a [Drosophila melanogaster]
ABW77911.1 odorant-binding protein 56d, partial [Drosophila melanogaster]
ABW77910.1 odorant-binding protein 56d, partial [Drosophila melanogaster]
ABW77909.1 odorant-binding protein 56d, partial [Drosophila melanogaster]
ABW77908.1 odorant-binding protein 56d, partial [Drosophila melanogaster]
ABW77907.1 odorant-binding protein 56d, partial [Drosophila melanogaster]
ABW77906.1 odorant-binding protein 56d, partial [Drosophila melanogaster]
ABW77905.1 odorant-binding protein 56d, partial [Drosophila melanogaster]
ABW77904.1 odorant-binding protein 56d, partial [Drosophila melanogaster]
ABW77903.1 odorant-binding protein 56d, partial [Drosophila melanogaster]
ABW77902.1 odorant-binding protein 56d, partial [Drosophila melanogaster]
ABW77901.1 odorant-binding protein 56d, partial [Drosophila melanogaster]
ABW77900.1 odorant-binding protein 56d, partial [Drosophila melanogaster]
ABW77899.1 odorant-binding protein 56d, partial [Drosophila melanogaster]
ABW77898.1 odorant-binding protein 56d, partial [Drosophila melanogaster]
ABW77897.1 odorant-binding protein 56d, partial [Drosophila melanogaster]
ABW77896.1 odorant-binding protein 56d, partial [Drosophila melanogaster]
ABW77895.1 odorant-binding protein 56d, partial [Drosophila melanogaster]
ABW77894.1 odorant-binding protein 56d, partial [Drosophila melanogaster]
ABW77893.1 odorant-binding protein 56d, partial [Drosophila melanogaster]
ABW77892.1 odorant-binding protein 56d, partial [Drosophila melanogaster]
ABW77891.1 odorant-binding protein 56d, partial [Drosophila melanogaster]
ABW77890.1 odorant-binding protein 56d, partial [Drosophila melanogaster]
ABW77889.1 odorant-binding protein 56d, partial [Drosophila melanogaster]
ABW77888.1 odorant-binding protein 56d, partial [Drosophila melanogaster]
ABW77887.1 odorant-binding protein 56d, partial [Drosophila melanogaster]
ABW77886.1 odorant-binding protein 56d, partial [Drosophila melanogaster]
ABW77885.1 odorant-binding protein 56d, partial [Drosophila melanogaster]
ABW77884.1 odorant-binding protein 56d, partial [Drosophila melanogaster]
ABW77883.1 odorant-binding protein 56d, partial [Drosophila melanogaster]
ABW77882.1 odorant-binding protein 56d, partial [Drosophila melanogaster]
ABW77881.1 odorant-binding protein 56d, partial [Drosophila melanogaster]
ABW77880.1 odorant-binding protein 56d, partial [Drosophila melanogaster]
ABW77879.1 odorant-binding protein 56d, partial [Drosophila melanogaster]
ABW77878.1 odorant-binding protein 56d, partial [Drosophila melanogaster]
ABW77877.1 odorant-binding protein 56d, partial [Drosophila melanogaster]
ABW77876.1 odorant-binding protein 56d, partial [Drosophila melanogaster]
ABW77875.1 odorant-binding protein 56d, partial [Drosophila melanogaster]
ABW77874.1 odorant-binding protein 56d, partial [Drosophila melanogaster]
ABW77873.1 odorant-binding protein 56d, partial [Drosophila melanogaster]
ABW77872.1 odorant-binding protein 56d, partial [Drosophila melanogaster]
ABW77871.1 odorant-binding protein 56d, partial [Drosophila melanogaster]
ABW77870.1 odorant-binding protein 56d, partial [Drosophila melanogaster]
ABW77869.1 odorant-binding protein 56d, partial [Drosophila melanogaster]
ABW77868.1 odorant-binding protein 56d, partial [Drosophila melanogaster]
ABW77867.1 odorant-binding protein 56d, partial [Drosophila melanogaster]
ABW77866.1 odorant-binding protein 56d, partial [Drosophila melanogaster]
ABW77865.1 odorant-binding protein 56d, partial [Drosophila melanogaster]
ABW77864.1 odorant-binding protein 56d, partial [Drosophila melanogaster]
ABW77863.1 odorant-binding protein 56d, partial [Drosophila melanogaster]
ABW77862.1 odorant-binding protein 56b, partial [Drosophila melanogaster]
ABW77861.1 odorant-binding protein 56b, partial [Drosophila melanogaster]
ABW77860.1 odorant-binding protein 56b, partial [Drosophila melanogaster]
ABW77859.1 odorant-binding protein 56b, partial [Drosophila melanogaster]
ABW77858.1 odorant-binding protein 56b, partial [Drosophila melanogaster]
ABW77857.1 odorant-binding protein 56b, partial [Drosophila melanogaster]
ABW77856.1 odorant-binding protein 56b, partial [Drosophila melanogaster]
ABW77855.1 odorant-binding protein 56b, partial [Drosophila melanogaster]
ABW77854.1 odorant-binding protein 56b, partial [Drosophila melanogaster]
ABW77853.1 odorant-binding protein 56b, partial [Drosophila melanogaster]
ABW77852.1 odorant-binding protein 56b, partial [Drosophila melanogaster]
ABW77851.1 odorant-binding protein 56b, partial [Drosophila melanogaster]
ABW77850.1 odorant-binding protein 56b, partial [Drosophila melanogaster]
ABW77849.1 odorant-binding protein 56b, partial [Drosophila melanogaster]
ABW77848.1 odorant-binding protein 56b, partial [Drosophila melanogaster]
ABW77847.1 odorant-binding protein 56b, partial [Drosophila melanogaster]
ABW77846.1 odorant-binding protein 56b, partial [Drosophila melanogaster]
ABW77845.1 odorant-binding protein 56b, partial [Drosophila melanogaster]
ABW77844.1 odorant-binding protein 56b, partial [Drosophila melanogaster]
ABW77843.1 odorant-binding protein 56b, partial [Drosophila melanogaster]
ABW77842.1 odorant-binding protein 56b, partial [Drosophila melanogaster]
ABW77841.1 odorant-binding protein 56b, partial [Drosophila melanogaster]
ABW77840.1 odorant-binding protein 56b, partial [Drosophila melanogaster]
ABW77839.1 odorant-binding protein 56b, partial [Drosophila melanogaster]
ABW77838.1 odorant-binding protein 56b, partial [Drosophila melanogaster]
ABW77837.1 odorant-binding protein 56b, partial [Drosophila melanogaster]
ABW77836.1 odorant-binding protein 56b, partial [Drosophila melanogaster]
ABW77835.1 odorant-binding protein 56b, partial [Drosophila melanogaster]
ABW77834.1 odorant-binding protein 56b, partial [Drosophila melanogaster]
ABW77833.1 odorant-binding protein 56b, partial [Drosophila melanogaster]
ABW77832.1 odorant-binding protein 56b, partial [Drosophila melanogaster]
ABW77831.1 odorant-binding protein 56b, partial [Drosophila melanogaster]
ABW77830.1 odorant-binding protein 56b, partial [Drosophila melanogaster]
ABW77829.1 odorant-binding protein 56b, partial [Drosophila melanogaster]
ABW77828.1 odorant-binding protein 56b, partial [Drosophila melanogaster]
ABW77827.1 odorant-binding protein 56b, partial [Drosophila melanogaster]
ABW77826.1 odorant-binding protein 56b, partial [Drosophila melanogaster]
ABW77825.1 odorant-binding protein 56b, partial [Drosophila melanogaster]
ABW77824.1 odorant-binding protein 56b, partial [Drosophila melanogaster]
ABW77823.1 odorant-binding protein 56b, partial [Drosophila melanogaster]
ABW77822.1 odorant-binding protein 56b, partial [Drosophila melanogaster]
ABW77821.1 odorant-binding protein 56b, partial [Drosophila melanogaster]
ABW77820.1 odorant-binding protein 56b, partial [Drosophila melanogaster]
ABW77819.1 odorant-binding protein 56b, partial [Drosophila melanogaster]
ABW77818.1 odorant-binding protein 56b, partial [Drosophila melanogaster]
ABW77817.1 odorant-binding protein 56b, partial [Drosophila melanogaster]
ABW77816.1 odorant-binding protein 56b, partial [Drosophila melanogaster]
ABW77815.1 odorant-binding protein 56b, partial [Drosophila melanogaster]
ABW77814.1 odorant-binding protein 56b, partial [Drosophila melanogaster]
ABW77813.1 odorant-binding protein 56b, partial [Drosophila melanogaster]
AAB51684.1 odorant-binding protein OS-F [Drosophila melanogaster]
AAB51683.1 odorant-binding protein OS-E [Drosophila melanogaster]
pdb|1OOH|B Chain B, Odorant Binding Protein Lush
pdb|1OOH|A Chain A, Odorant Binding Protein Lush
pdb|1OOF|B Chain B, Odorant Binding Protein Lush
pdb|1OOF|A Chain A, Odorant Binding Protein Lush
pdb|1OOG|B Chain B, Odorant Binding Protein Lush
pdb|1OOG|A Chain A, Odorant Binding Protein Lush
ACY93965.1 odorant binding protein 19d [Drosophila melanogaster]
ACY93964.1 odorant binding protein 19d [Drosophila melanogaster]
ACY93963.1 odorant binding protein 19d [Drosophila melanogaster]
ACY93962.1 odorant binding protein 19d [Drosophila melanogaster]
ACY93961.1 odorant binding protein 19d [Drosophila melanogaster]
ACY93960.1 odorant binding protein 19d [Drosophila melanogaster]
ACY93959.1 odorant binding protein 19d [Drosophila melanogaster]
ACY93958.1 odorant binding protein 19d [Drosophila melanogaster]
ACY93957.1 odorant binding protein 19d [Drosophila melanogaster]
ACY93956.1 odorant binding protein 19d [Drosophila melanogaster]
ACY93955.1 odorant binding protein 19d [Drosophila melanogaster]
ACY93954.1 odorant binding protein 19d [Drosophila melanogaster]
ACY93953.1 odorant binding protein 19d [Drosophila melanogaster]
ACY93952.1 odorant binding protein 19d [Drosophila melanogaster]
ACY93951.1 odorant binding protein 19d [Drosophila melanogaster]
ACY93950.1 odorant binding protein 19d [Drosophila melanogaster]
ACY93949.1 odorant binding protein 19d [Drosophila melanogaster]
ACY93948.1 odorant binding protein 19d [Drosophila melanogaster]
ACY93947.1 odorant binding protein 19d [Drosophila melanogaster]
ACY93946.1 odorant binding protein 19d [Drosophila melanogaster]
ACY93945.1 odorant binding protein 19d [Drosophila melanogaster]
ACY93944.1 odorant binding protein 19d [Drosophila melanogaster]
ACY93943.1 odorant binding protein 19d [Drosophila melanogaster]
ACY93942.1 odorant binding protein 19d [Drosophila melanogaster]
ACY93941.1 odorant binding protein 19d [Drosophila melanogaster]
ACY93940.1 odorant binding protein 19d [Drosophila melanogaster]
ACY93939.1 odorant binding protein 19d [Drosophila melanogaster]
ACY93938.1 odorant binding protein 19d [Drosophila melanogaster]
ACY93937.1 odorant binding protein 19d [Drosophila melanogaster]
ACY93936.1 odorant binding protein 19d [Drosophila melanogaster]
ACY93935.1 odorant binding protein 19d [Drosophila melanogaster]
ACY93934.1 odorant binding protein 19d [Drosophila melanogaster]
ACY93933.1 odorant binding protein 19d [Drosophila melanogaster]
ACY93932.1 odorant binding protein 19d [Drosophila melanogaster]
ACY93931.1 odorant binding protein 19d [Drosophila melanogaster]
ACY93930.1 odorant binding protein 19d [Drosophila melanogaster]
ACY93929.1 odorant binding protein 19d [Drosophila melanogaster]
ACY93928.1 odorant binding protein 19d [Drosophila melanogaster]
ACY93927.1 odorant binding protein 19d [Drosophila melanogaster]
ACY93926.1 odorant binding protein 19d [Drosophila melanogaster]
ACY93925.1 odorant binding protein 19d [Drosophila melanogaster]
ACY93924.1 odorant binding protein 19d [Drosophila melanogaster]
ACY93923.1 odorant binding protein 19d [Drosophila melanogaster]
ACY93922.1 odorant binding protein 19d [Drosophila melanogaster]
ACY93921.1 odorant binding protein 19d [Drosophila melanogaster]
ACY93920.1 odorant binding protein 19d [Drosophila melanogaster]
ACY93919.1 odorant binding protein 19d [Drosophila melanogaster]
ACY93918.1 odorant binding protein 19d [Drosophila melanogaster]
ACY93917.1 odorant binding protein 19d [Drosophila melanogaster]
ACY93916.1 odorant binding protein 19d [Drosophila melanogaster]
ACY93915.1 odorant binding protein 19d [Drosophila melanogaster]
ACY93914.1 odorant binding protein 19d [Drosophila melanogaster]
ACY93913.1 odorant binding protein 19d [Drosophila melanogaster]
ACY93912.1 odorant binding protein 19d [Drosophila melanogaster]
ACY93911.1 odorant binding protein 19d [Drosophila melanogaster]
ACY93910.1 odorant binding protein 19d [Drosophila melanogaster]
ACY93909.1 odorant binding protein 19d [Drosophila melanogaster]
ACY93908.1 odorant binding protein 19d [Drosophila melanogaster]
ACY93907.1 odorant binding protein 19d [Drosophila melanogaster]
ACY93906.1 odorant binding protein 19d [Drosophila melanogaster]
ACY93905.1 odorant binding protein 19d [Drosophila melanogaster]
ACY93904.1 odorant binding protein 19d [Drosophila melanogaster]
ACY93903.1 odorant binding protein 19d [Drosophila melanogaster]
ACY93902.1 odorant binding protein 19d [Drosophila melanogaster]
ACY93901.1 odorant binding protein 19d [Drosophila melanogaster]
ACY93900.1 odorant binding protein 19d [Drosophila melanogaster]
ACY93899.1 odorant binding protein 19d [Drosophila melanogaster]
ACY93898.1 odorant binding protein 19d [Drosophila melanogaster]
ACY93897.1 odorant binding protein 19d [Drosophila melanogaster]
ACY93896.1 odorant binding protein 19d [Drosophila melanogaster]
ACY93895.1 odorant binding protein 19d [Drosophila melanogaster]
ACY93894.1 odorant binding protein 19d [Drosophila melanogaster]
ACY93893.1 odorant binding protein 19d [Drosophila melanogaster]
ACY93892.1 odorant binding protein 19d [Drosophila melanogaster]
ACY93891.1 odorant binding protein 19d [Drosophila melanogaster]
ACY93890.1 odorant binding protein 19d [Drosophila melanogaster]
ACY93889.1 odorant binding protein 19d [Drosophila melanogaster]
ACY93888.1 odorant binding protein 19d [Drosophila melanogaster]
ACY93887.1 odorant binding protein 19d [Drosophila melanogaster]
ACY93886.1 odorant binding protein 19d [Drosophila melanogaster]
ACY93885.1 odorant binding protein 19d [Drosophila melanogaster]
ACY93884.1 odorant binding protein 19d [Drosophila melanogaster]
ACY93883.1 odorant binding protein 19d [Drosophila melanogaster]
ACY93882.1 odorant binding protein 19d [Drosophila melanogaster]
ACY93881.1 odorant binding protein 19d [Drosophila melanogaster]
ACY93880.1 odorant binding protein 19d [Drosophila melanogaster]
ACY93879.1 odorant binding protein 19d [Drosophila melanogaster]
ACY93878.1 odorant binding protein 19d [Drosophila melanogaster]
ACY93877.1 odorant binding protein 19d [Drosophila melanogaster]
ACY93876.1 odorant binding protein 19d [Drosophila melanogaster]
ACY93875.1 odorant binding protein 19d [Drosophila melanogaster]
ACY93874.1 odorant binding protein 19d [Drosophila melanogaster]
ACY93873.1 odorant binding protein 19d [Drosophila melanogaster]
ACY93872.1 odorant binding protein 19d [Drosophila melanogaster]
ACY93871.1 odorant binding protein 19d [Drosophila melanogaster]
ACY93870.1 odorant binding protein 19d [Drosophila melanogaster]
ACY93869.1 odorant binding protein 19d [Drosophila melanogaster]
ACY93868.1 odorant binding protein 19d [Drosophila melanogaster]
ACY93867.1 odorant binding protein 19d [Drosophila melanogaster]
ACY93866.1 odorant binding protein 19d [Drosophila melanogaster]
ACY93865.1 odorant binding protein 19d [Drosophila melanogaster]
ACY93864.1 odorant binding protein 19d [Drosophila melanogaster]
ACY93863.1 odorant binding protein 19d [Drosophila melanogaster]
ACY93862.1 odorant binding protein 19d [Drosophila melanogaster]
ACY93861.1 odorant binding protein 19d [Drosophila melanogaster]
ACY93860.1 odorant binding protein 19d [Drosophila melanogaster]
ACY93859.1 odorant binding protein 19d [Drosophila melanogaster]
ACY93858.1 odorant binding protein 19d [Drosophila melanogaster]
ACY93857.1 odorant binding protein 19d [Drosophila melanogaster]
ACY93856.1 odorant binding protein 19d [Drosophila melanogaster]
ACY93855.1 odorant binding protein 19d [Drosophila melanogaster]
ACY93854.1 odorant binding protein 19d [Drosophila melanogaster]
ACY93853.1 odorant binding protein 19d [Drosophila melanogaster]
ACY93852.1 odorant binding protein 19d [Drosophila melanogaster]
ACY93851.1 odorant binding protein 19d [Drosophila melanogaster]
ACY93850.1 odorant binding protein 19d [Drosophila melanogaster]
ACY93849.1 odorant binding protein 19d [Drosophila melanogaster]
ACY93848.1 odorant binding protein 19d [Drosophila melanogaster]
ACY93847.1 odorant binding protein 19d [Drosophila melanogaster]
ACY93846.1 odorant binding protein 19d [Drosophila melanogaster]
ACY93845.1 odorant binding protein 19d [Drosophila melanogaster]
ACY93844.1 odorant binding protein 19d [Drosophila melanogaster]
ACY93843.1 odorant binding protein 19d [Drosophila melanogaster]
ACY93842.1 odorant binding protein 19d [Drosophila melanogaster]
ACY93841.1 odorant binding protein 19d [Drosophila melanogaster]
ACY93840.1 odorant binding protein 19d [Drosophila melanogaster]
ACY93839.1 odorant binding protein 19d [Drosophila melanogaster]
ACY93838.1 odorant binding protein 19d [Drosophila melanogaster]
ACY93837.1 odorant binding protein 19d [Drosophila melanogaster]
ACY93836.1 odorant binding protein 19d [Drosophila melanogaster]
ACY93835.1 odorant binding protein 19d [Drosophila melanogaster]
ACY93834.1 odorant binding protein 19d [Drosophila melanogaster]
ACY93833.1 odorant binding protein 19d [Drosophila melanogaster]
ACY93832.1 odorant binding protein 19d [Drosophila melanogaster]
ACY93831.1 odorant binding protein 19d [Drosophila melanogaster]
ACY93830.1 odorant binding protein 19d [Drosophila melanogaster]
ACY93829.1 odorant binding protein 19d [Drosophila melanogaster]
ACY93828.1 odorant binding protein 19d [Drosophila melanogaster]
ACY93827.1 odorant binding protein 19d [Drosophila melanogaster]
ACY93826.1 odorant binding protein 19d [Drosophila melanogaster]
ACY93825.1 odorant binding protein 19d [Drosophila melanogaster]
ACY93824.1 odorant binding protein 19d [Drosophila melanogaster]
ACY93823.1 odorant binding protein 19d [Drosophila melanogaster]
ACY93822.1 odorant binding protein 19d [Drosophila melanogaster]
ACY93821.1 odorant binding protein 19d [Drosophila melanogaster]
ACY93820.1 odorant binding protein 19d [Drosophila melanogaster]
ACY93819.1 odorant binding protein 19d [Drosophila melanogaster]
ACY93818.1 odorant binding protein 19d [Drosophila melanogaster]
ACY93817.1 odorant binding protein 19d [Drosophila melanogaster]
ACY93816.1 odorant binding protein 19d [Drosophila melanogaster]
ACY93815.1 odorant binding protein 19d [Drosophila melanogaster]
ACY93814.1 odorant binding protein 19d [Drosophila melanogaster]
ACY93813.1 odorant binding protein 19d [Drosophila melanogaster]
ACY93812.1 odorant binding protein 19d [Drosophila melanogaster]
ACY93811.1 odorant binding protein 19d [Drosophila melanogaster]
ACY93810.1 odorant binding protein 19d [Drosophila melanogaster]
ACY93809.1 odorant binding protein 19d [Drosophila melanogaster]
ACY93808.1 odorant binding protein 19d [Drosophila melanogaster]
ACY93807.1 odorant binding protein 19d [Drosophila melanogaster]
ACY93806.1 odorant binding protein 19d [Drosophila melanogaster]
ACY93805.1 odorant binding protein 19d [Drosophila melanogaster]
ACY93804.1 odorant binding protein 19d [Drosophila melanogaster]
ACY93803.1 odorant binding protein 19d [Drosophila melanogaster]
ACY93802.1 odorant binding protein 19d [Drosophila melanogaster]
ACY93801.1 odorant binding protein 19d [Drosophila melanogaster]
ACY93800.1 odorant binding protein 19d [Drosophila melanogaster]
ACY93799.1 odorant binding protein 19d [Drosophila melanogaster]
ACY93798.1 odorant binding protein 19d [Drosophila melanogaster]
ACY93797.1 odorant binding protein 19d [Drosophila melanogaster]
ACY93796.1 odorant binding protein 19d [Drosophila melanogaster]
ACY93795.1 odorant binding protein 19d [Drosophila melanogaster]
ACY93794.1 odorant binding protein 19d [Drosophila melanogaster]
ACY93793.1 odorant binding protein 19d [Drosophila melanogaster]
ACY93792.1 odorant binding protein 19d [Drosophila melanogaster]
ACY93791.1 odorant binding protein 19d [Drosophila melanogaster]
ACY93790.1 odorant binding protein 19d [Drosophila melanogaster]
ACY93789.1 odorant binding protein 19d [Drosophila melanogaster]
ACY93788.1 odorant binding protein 19d [Drosophila melanogaster]
ACY93787.1 odorant binding protein 19d [Drosophila melanogaster]
ACY93786.1 odorant binding protein 19d [Drosophila melanogaster]
ACY93785.1 odorant binding protein 19d [Drosophila melanogaster]
ACY93784.1 odorant binding protein 19d [Drosophila melanogaster]
ACY93783.1 odorant binding protein 19d [Drosophila melanogaster]
ACY93782.1 odorant binding protein 19d [Drosophila melanogaster]
ACY93781.1 odorant binding protein 19d [Drosophila melanogaster]
ACY93780.1 odorant binding protein 19d [Drosophila melanogaster]
ACY93779.1 odorant binding protein 19d [Drosophila melanogaster]
ACY93778.1 odorant binding protein 19d [Drosophila melanogaster]
ACY93777.1 odorant binding protein 19d [Drosophila melanogaster]
ACY93776.1 odorant binding protein 19d [Drosophila melanogaster]
ACY93775.1 odorant binding protein 19d [Drosophila melanogaster]
ACY93774.1 odorant binding protein 19d [Drosophila melanogaster]
ACY93773.1 odorant binding protein 19d [Drosophila melanogaster]
ACY93772.1 odorant binding protein 19d [Drosophila melanogaster]
ACY93771.1 odorant binding protein 19d [Drosophila melanogaster]
ACY93770.1 odorant binding protein 19d [Drosophila melanogaster]
ACY93769.1 odorant binding protein 19d [Drosophila melanogaster]
ACY93768.1 odorant binding protein 19d [Drosophila melanogaster]
ACY93767.1 odorant binding protein 19d [Drosophila melanogaster]
ACY93766.1 odorant binding protein 19d [Drosophila melanogaster]
ACY93765.1 odorant binding protein 19d [Drosophila melanogaster]
ACY93764.1 odorant binding protein 19d [Drosophila melanogaster]
ACY93763.1 odorant binding protein 19d [Drosophila melanogaster]
ACY93762.1 odorant binding protein 19d [Drosophila melanogaster]
ACY93761.1 odorant binding protein 19d [Drosophila melanogaster]
ACY93760.1 odorant binding protein 19d [Drosophila melanogaster]
ACY93759.1 odorant binding protein 19d [Drosophila melanogaster]
ACY93758.1 odorant binding protein 19d [Drosophila melanogaster]
ACY93757.1 odorant binding protein 19d [Drosophila melanogaster]
ACY93756.1 odorant binding protein 19d [Drosophila melanogaster]
ACY93755.1 odorant binding protein 19d [Drosophila melanogaster]
ACY93754.1 odorant binding protein 19d [Drosophila melanogaster]
ACY93753.1 odorant binding protein 19d [Drosophila melanogaster]
ACY93752.1 odorant binding protein 19d [Drosophila melanogaster]
ACY93751.1 odorant binding protein 19d [Drosophila melanogaster]
ACY93750.1 odorant binding protein 19d [Drosophila melanogaster]
ACY93749.1 odorant binding protein 19d [Drosophila melanogaster]
ACY93748.1 odorant binding protein 19d [Drosophila melanogaster]
ACY93747.1 odorant binding protein 19d [Drosophila melanogaster]
ACY93746.1 odorant binding protein 19c [Drosophila melanogaster]
ACY93745.1 odorant binding protein 19c [Drosophila melanogaster]
ACY93744.1 odorant binding protein 19c [Drosophila melanogaster]
ACY93743.1 odorant binding protein 19c [Drosophila melanogaster]
ACY93742.1 odorant binding protein 19c [Drosophila melanogaster]
ACY93741.1 odorant binding protein 19c [Drosophila melanogaster]
ACY93740.1 odorant binding protein 19c [Drosophila melanogaster]
ACY93739.1 odorant binding protein 19c [Drosophila melanogaster]
ACY93738.1 odorant binding protein 19c [Drosophila melanogaster]
ACY93737.1 odorant binding protein 19c [Drosophila melanogaster]
ACY93736.1 odorant binding protein 19c [Drosophila melanogaster]
ACY93735.1 odorant binding protein 19c [Drosophila melanogaster]
ACY93734.1 odorant binding protein 19c [Drosophila melanogaster]
ACY93733.1 odorant binding protein 19c [Drosophila melanogaster]
ACY93732.1 odorant binding protein 19c [Drosophila melanogaster]
ACY93731.1 odorant binding protein 19c [Drosophila melanogaster]
ACY93730.1 odorant binding protein 19c [Drosophila melanogaster]
ACY93729.1 odorant binding protein 19c [Drosophila melanogaster]
ACY93728.1 odorant binding protein 19c [Drosophila melanogaster]
ACY93727.1 odorant binding protein 19c [Drosophila melanogaster]
ACY93726.1 odorant binding protein 19c [Drosophila melanogaster]
ACY93725.1 odorant binding protein 19c [Drosophila melanogaster]
ACY93724.1 odorant binding protein 19c [Drosophila melanogaster]
ACY93723.1 odorant binding protein 19c [Drosophila melanogaster]
ACY93722.1 odorant binding protein 19c [Drosophila melanogaster]
ACY93721.1 odorant binding protein 19c [Drosophila melanogaster]
ACY93720.1 odorant binding protein 19c [Drosophila melanogaster]
ACY93719.1 odorant binding protein 19c [Drosophila melanogaster]
ACY93718.1 odorant binding protein 19c [Drosophila melanogaster]
ACY93717.1 odorant binding protein 19c [Drosophila melanogaster]
ACY93716.1 odorant binding protein 19c [Drosophila melanogaster]
ACY93715.1 odorant binding protein 19c [Drosophila melanogaster]
ACY93714.1 odorant binding protein 19c [Drosophila melanogaster]
ACY93713.1 odorant binding protein 19c [Drosophila melanogaster]
ACY93712.1 odorant binding protein 19c [Drosophila melanogaster]
ACY93711.1 odorant binding protein 19c [Drosophila melanogaster]
ACY93710.1 odorant binding protein 19c [Drosophila melanogaster]
ACY93709.1 odorant binding protein 19c [Drosophila melanogaster]
ACY93708.1 odorant binding protein 19c [Drosophila melanogaster]
ACY93707.1 odorant binding protein 19c [Drosophila melanogaster]
ACY93706.1 odorant binding protein 19c [Drosophila melanogaster]
ACY93705.1 odorant binding protein 19c [Drosophila melanogaster]
ACY93704.1 odorant binding protein 19c [Drosophila melanogaster]
ACY93703.1 odorant binding protein 19c [Drosophila melanogaster]
ACY93702.1 odorant binding protein 19c [Drosophila melanogaster]
ACY93701.1 odorant binding protein 19c [Drosophila melanogaster]
ACY93700.1 odorant binding protein 19c [Drosophila melanogaster]
ACY93699.1 odorant binding protein 19c [Drosophila melanogaster]
ACY93698.1 odorant binding protein 19c [Drosophila melanogaster]
ACY93697.1 odorant binding protein 19c [Drosophila melanogaster]
ACY93696.1 odorant binding protein 19c [Drosophila melanogaster]
ACY93695.1 odorant binding protein 19c [Drosophila melanogaster]
ACY93694.1 odorant binding protein 19c [Drosophila melanogaster]
ACY93693.1 odorant binding protein 19c [Drosophila melanogaster]
ACY93692.1 odorant binding protein 19c [Drosophila melanogaster]
ACY93691.1 odorant binding protein 19c [Drosophila melanogaster]
ACY93690.1 odorant binding protein 19c [Drosophila melanogaster]
ACY93689.1 odorant binding protein 19c [Drosophila melanogaster]
ACY93688.1 odorant binding protein 19c [Drosophila melanogaster]
ACY93687.1 odorant binding protein 19c [Drosophila melanogaster]
ACY93686.1 odorant binding protein 19c [Drosophila melanogaster]
ACY93685.1 odorant binding protein 19c [Drosophila melanogaster]
ACY93684.1 odorant binding protein 19c [Drosophila melanogaster]
ACY93683.1 odorant binding protein 19c [Drosophila melanogaster]
ACY93682.1 odorant binding protein 19c [Drosophila melanogaster]
ACY93681.1 odorant binding protein 19c [Drosophila melanogaster]
ACY93680.1 odorant binding protein 19c [Drosophila melanogaster]
ACY93679.1 odorant binding protein 19c [Drosophila melanogaster]
ACY93678.1 odorant binding protein 19c [Drosophila melanogaster]
ACY93677.1 odorant binding protein 19c [Drosophila melanogaster]
ACY93676.1 odorant binding protein 19c [Drosophila melanogaster]
ACY93675.1 odorant binding protein 19c [Drosophila melanogaster]
ACY93674.1 odorant binding protein 19c [Drosophila melanogaster]
ACY93673.1 odorant binding protein 19c [Drosophila melanogaster]
ACY93672.1 odorant binding protein 19c [Drosophila melanogaster]
ACY93671.1 odorant binding protein 19c [Drosophila melanogaster]
ACY93670.1 odorant binding protein 19c [Drosophila melanogaster]
ACY93669.1 odorant binding protein 19c [Drosophila melanogaster]
ACY93668.1 odorant binding protein 19c [Drosophila melanogaster]
ACY93667.1 odorant binding protein 19c [Drosophila melanogaster]
ACY93666.1 odorant binding protein 19c [Drosophila melanogaster]
ACY93665.1 odorant binding protein 19c [Drosophila melanogaster]
ACY93664.1 odorant binding protein 19c [Drosophila melanogaster]
ACY93663.1 odorant binding protein 19c [Drosophila melanogaster]
ACY93662.1 odorant binding protein 19c [Drosophila melanogaster]
ACY93661.1 odorant binding protein 19c [Drosophila melanogaster]
ACY93660.1 odorant binding protein 19c [Drosophila melanogaster]
ACY93659.1 odorant binding protein 19c [Drosophila melanogaster]
ACY93658.1 odorant binding protein 19c [Drosophila melanogaster]
ACY93657.1 odorant binding protein 19c [Drosophila melanogaster]
ACY93656.1 odorant binding protein 19c [Drosophila melanogaster]
ACY93655.1 odorant binding protein 19c [Drosophila melanogaster]
ACY93654.1 odorant binding protein 19c [Drosophila melanogaster]
ACY93653.1 odorant binding protein 19c [Drosophila melanogaster]
ACY93652.1 odorant binding protein 19c [Drosophila melanogaster]
ACY93651.1 odorant binding protein 19c [Drosophila melanogaster]
ACY93650.1 odorant binding protein 19c [Drosophila melanogaster]
ACY93649.1 odorant binding protein 19c [Drosophila melanogaster]
ACY93648.1 odorant binding protein 19c [Drosophila melanogaster]
ACY93647.1 odorant binding protein 19c [Drosophila melanogaster]
ACY93646.1 odorant binding protein 19c [Drosophila melanogaster]
ACY93645.1 odorant binding protein 19c [Drosophila melanogaster]
ACY93644.1 odorant binding protein 19c [Drosophila melanogaster]
ACY93643.1 odorant binding protein 19c [Drosophila melanogaster]
ACY93642.1 odorant binding protein 19c [Drosophila melanogaster]
ACY93641.1 odorant binding protein 19c [Drosophila melanogaster]
ACY93640.1 odorant binding protein 19c [Drosophila melanogaster]
ACY93639.1 odorant binding protein 19c [Drosophila melanogaster]
ACY93638.1 odorant binding protein 19c [Drosophila melanogaster]
ACY93637.1 odorant binding protein 19c [Drosophila melanogaster]
ACY93636.1 odorant binding protein 19c [Drosophila melanogaster]
ACY93635.1 odorant binding protein 19c [Drosophila melanogaster]
ACY93634.1 odorant binding protein 19c [Drosophila melanogaster]
ACY93633.1 odorant binding protein 19c [Drosophila melanogaster]
ACY93632.1 odorant binding protein 19c [Drosophila melanogaster]
ACY93631.1 odorant binding protein 19c [Drosophila melanogaster]
ACY93630.1 odorant binding protein 19c [Drosophila melanogaster]
ACY93629.1 odorant binding protein 19c [Drosophila melanogaster]
ACY93628.1 odorant binding protein 19c [Drosophila melanogaster]
ACY93627.1 odorant binding protein 19c [Drosophila melanogaster]
ACY93626.1 odorant binding protein 19c [Drosophila melanogaster]
ACY93625.1 odorant binding protein 19c [Drosophila melanogaster]
ACY93624.1 odorant binding protein 19c [Drosophila melanogaster]
ACY93623.1 odorant binding protein 19c [Drosophila melanogaster]
ACY93622.1 odorant binding protein 19c [Drosophila melanogaster]
ACY93621.1 odorant binding protein 19c [Drosophila melanogaster]
ACY93620.1 odorant binding protein 19c [Drosophila melanogaster]
ACY93619.1 odorant binding protein 19c [Drosophila melanogaster]
ACY93618.1 odorant binding protein 19c [Drosophila melanogaster]
ACY93617.1 odorant binding protein 19c [Drosophila melanogaster]
ACY93616.1 odorant binding protein 19c [Drosophila melanogaster]
ACY93615.1 odorant binding protein 19c [Drosophila melanogaster]
ACY93614.1 odorant binding protein 19c [Drosophila melanogaster]
ACY93613.1 odorant binding protein 19c [Drosophila melanogaster]
ACY93612.1 odorant binding protein 19c [Drosophila melanogaster]
ACY93611.1 odorant binding protein 19c [Drosophila melanogaster]
ACY93610.1 odorant binding protein 19c [Drosophila melanogaster]
ACY93609.1 odorant binding protein 19c [Drosophila melanogaster]
ACY93608.1 odorant binding protein 19c [Drosophila melanogaster]
ACY93607.1 odorant binding protein 19c [Drosophila melanogaster]
ACY93606.1 odorant binding protein 19c [Drosophila melanogaster]
ACY93605.1 odorant binding protein 19c [Drosophila melanogaster]
ACY93604.1 odorant binding protein 19c [Drosophila melanogaster]
ACY93603.1 odorant binding protein 19c [Drosophila melanogaster]
ACY93602.1 odorant binding protein 19c [Drosophila melanogaster]
ACY93601.1 odorant binding protein 19c [Drosophila melanogaster]
ACY93600.1 odorant binding protein 19c [Drosophila melanogaster]
ACY93599.1 odorant binding protein 19c [Drosophila melanogaster]
ACY93598.1 odorant binding protein 19c [Drosophila melanogaster]
ACY93597.1 odorant binding protein 19c [Drosophila melanogaster]
ACY93596.1 odorant binding protein 19c [Drosophila melanogaster]
ACY93595.1 odorant binding protein 19c [Drosophila melanogaster]
ACY93594.1 odorant binding protein 19c [Drosophila melanogaster]
ACY93593.1 odorant binding protein 19c [Drosophila melanogaster]
ACY93592.1 odorant binding protein 19c [Drosophila melanogaster]
ACY93591.1 odorant binding protein 19c [Drosophila melanogaster]
ACY93590.1 odorant binding protein 19c [Drosophila melanogaster]
ACY93589.1 odorant binding protein 19c [Drosophila melanogaster]
ACY93588.1 odorant binding protein 19c [Drosophila melanogaster]
ACY93587.1 odorant binding protein 19c [Drosophila melanogaster]
ACY93586.1 odorant binding protein 19c [Drosophila melanogaster]
ACY93585.1 odorant binding protein 19c [Drosophila melanogaster]
ACY93584.1 odorant binding protein 19c [Drosophila melanogaster]
ACY93583.1 odorant binding protein 19c [Drosophila melanogaster]
ACY93582.1 odorant binding protein 19c [Drosophila melanogaster]
ACY93581.1 odorant binding protein 19c [Drosophila melanogaster]
ACY93580.1 odorant binding protein 19c [Drosophila melanogaster]
ACY93579.1 odorant binding protein 19c [Drosophila melanogaster]
ACY93578.1 odorant binding protein 19c [Drosophila melanogaster]
ACY93577.1 odorant binding protein 19c [Drosophila melanogaster]
ACY93576.1 odorant binding protein 19c [Drosophila melanogaster]
ACY93575.1 odorant binding protein 19c [Drosophila melanogaster]
ACY93574.1 odorant binding protein 19c [Drosophila melanogaster]
ACY93573.1 odorant binding protein 19c [Drosophila melanogaster]
ACY93572.1 odorant binding protein 19c [Drosophila melanogaster]
ACY93571.1 odorant binding protein 19c [Drosophila melanogaster]
ACY93570.1 odorant binding protein 19c [Drosophila melanogaster]
ACY93569.1 odorant binding protein 19c [Drosophila melanogaster]
ACY93568.1 odorant binding protein 19c [Drosophila melanogaster]
ACY93567.1 odorant binding protein 19c [Drosophila melanogaster]
ACY93566.1 odorant binding protein 19c [Drosophila melanogaster]
ACY93565.1 odorant binding protein 19c [Drosophila melanogaster]
ACY93564.1 odorant binding protein 19c [Drosophila melanogaster]
ACY93563.1 odorant binding protein 19c [Drosophila melanogaster]
ACY93562.1 odorant binding protein 19c [Drosophila melanogaster]
ACY93561.1 odorant binding protein 19c [Drosophila melanogaster]
ACY93560.1 odorant binding protein 19c [Drosophila melanogaster]
ACY93559.1 odorant binding protein 19c [Drosophila melanogaster]
ACY93558.1 odorant binding protein 19c [Drosophila melanogaster]
ACY93557.1 odorant binding protein 19c [Drosophila melanogaster]
ACY93556.1 odorant binding protein 19c [Drosophila melanogaster]
ACY93555.1 odorant binding protein 19c [Drosophila melanogaster]
ACY93554.1 odorant binding protein 19c [Drosophila melanogaster]
ACY93553.1 odorant binding protein 19c [Drosophila melanogaster]
ACY93552.1 odorant binding protein 19c [Drosophila melanogaster]
ACY93551.1 odorant binding protein 19c [Drosophila melanogaster]
ACY93550.1 odorant binding protein 19c [Drosophila melanogaster]
ACY93549.1 odorant binding protein 19c [Drosophila melanogaster]
ACY93548.1 odorant binding protein 19c [Drosophila melanogaster]
ACY93547.1 odorant binding protein 19c [Drosophila melanogaster]
ACY93546.1 odorant binding protein 19c [Drosophila melanogaster]
ACY93545.1 odorant binding protein 19c [Drosophila melanogaster]
ACY93544.1 odorant binding protein 19c [Drosophila melanogaster]
ACY93543.1 odorant binding protein 19b [Drosophila melanogaster]
ACY93542.1 odorant binding protein 19b [Drosophila melanogaster]
ACY93541.1 odorant binding protein 19b [Drosophila melanogaster]
ACY93540.1 odorant binding protein 19b [Drosophila melanogaster]
ACY93539.1 odorant binding protein 19b [Drosophila melanogaster]
ACY93538.1 odorant binding protein 19b [Drosophila melanogaster]
ACY93537.1 odorant binding protein 19b [Drosophila melanogaster]
ACY93536.1 odorant binding protein 19b [Drosophila melanogaster]
ACY93535.1 odorant binding protein 19b [Drosophila melanogaster]
ACY93534.1 odorant binding protein 19b [Drosophila melanogaster]
ACY93533.1 odorant binding protein 19b [Drosophila melanogaster]
ACY93532.1 odorant binding protein 19b [Drosophila melanogaster]
ACY93531.1 odorant binding protein 19b [Drosophila melanogaster]
ACY93530.1 odorant binding protein 19b [Drosophila melanogaster]
ACY93529.1 odorant binding protein 19b [Drosophila melanogaster]
ACY93528.1 odorant binding protein 19b [Drosophila melanogaster]
ACY93527.1 odorant binding protein 19b [Drosophila melanogaster]
ACY93526.1 odorant binding protein 19b [Drosophila melanogaster]
ACY93525.1 odorant binding protein 19b [Drosophila melanogaster]
ACY93524.1 odorant binding protein 19b [Drosophila melanogaster]
ACY93523.1 odorant binding protein 19b [Drosophila melanogaster]
ACY93522.1 odorant binding protein 19b [Drosophila melanogaster]
ACY93521.1 odorant binding protein 19b [Drosophila melanogaster]
ACY93520.1 odorant binding protein 19b [Drosophila melanogaster]
ACY93519.1 odorant binding protein 19b [Drosophila melanogaster]
ACY93518.1 odorant binding protein 19b [Drosophila melanogaster]
ACY93517.1 odorant binding protein 19b [Drosophila melanogaster]
ACY93516.1 odorant binding protein 19b [Drosophila melanogaster]
ACY93515.1 odorant binding protein 19b [Drosophila melanogaster]
ACY93514.1 odorant binding protein 19b [Drosophila melanogaster]
ACY93513.1 odorant binding protein 19b [Drosophila melanogaster]
ACY93512.1 odorant binding protein 19b [Drosophila melanogaster]
ACY93511.1 odorant binding protein 19b [Drosophila melanogaster]
ACY93510.1 odorant binding protein 19b [Drosophila melanogaster]
ACY93509.1 odorant binding protein 19b [Drosophila melanogaster]
ACY93508.1 odorant binding protein 19b [Drosophila melanogaster]
ACY93507.1 odorant binding protein 19b [Drosophila melanogaster]
ACY93506.1 odorant binding protein 19b [Drosophila melanogaster]
ACY93505.1 odorant binding protein 19b [Drosophila melanogaster]
ACY93504.1 odorant binding protein 19b [Drosophila melanogaster]
ACY93503.1 odorant binding protein 19b [Drosophila melanogaster]
ACY93502.1 odorant binding protein 19b [Drosophila melanogaster]
ACY93501.1 odorant binding protein 19b [Drosophila melanogaster]
ACY93500.1 odorant binding protein 19b [Drosophila melanogaster]
ACY93499.1 odorant binding protein 19b [Drosophila melanogaster]
ACY93498.1 odorant binding protein 19b [Drosophila melanogaster]
ACY93497.1 odorant binding protein 19b [Drosophila melanogaster]
ACY93496.1 odorant binding protein 19b [Drosophila melanogaster]
ACY93495.1 odorant binding protein 19b [Drosophila melanogaster]
ACY93494.1 odorant binding protein 19b [Drosophila melanogaster]
ACY93493.1 odorant binding protein 19b [Drosophila melanogaster]
ACY93492.1 odorant binding protein 19b [Drosophila melanogaster]
ACY93491.1 odorant binding protein 19b [Drosophila melanogaster]
ACY93490.1 odorant binding protein 19b [Drosophila melanogaster]
ACY93489.1 odorant binding protein 19b [Drosophila melanogaster]
ACY93488.1 odorant binding protein 19b [Drosophila melanogaster]
ACY93487.1 odorant binding protein 19b [Drosophila melanogaster]
ACY93486.1 odorant binding protein 19b [Drosophila melanogaster]
ACY93485.1 odorant binding protein 19b [Drosophila melanogaster]
ACY93484.1 odorant binding protein 19b [Drosophila melanogaster]
ACY93483.1 odorant binding protein 19b [Drosophila melanogaster]
ACY93482.1 odorant binding protein 19b [Drosophila melanogaster]
ACY93481.1 odorant binding protein 19b [Drosophila melanogaster]
ACY93480.1 odorant binding protein 19b [Drosophila melanogaster]
ACY93479.1 odorant binding protein 19b [Drosophila melanogaster]
ACY93478.1 odorant binding protein 19b [Drosophila melanogaster]
ACY93477.1 odorant binding protein 19b [Drosophila melanogaster]
ACY93476.1 odorant binding protein 19b [Drosophila melanogaster]
ACY93475.1 odorant binding protein 19b [Drosophila melanogaster]
ACY93474.1 odorant binding protein 19b [Drosophila melanogaster]
ACY93473.1 odorant binding protein 19b [Drosophila melanogaster]
ACY93472.1 odorant binding protein 19b [Drosophila melanogaster]
ACY93471.1 odorant binding protein 19b [Drosophila melanogaster]
ACY93470.1 odorant binding protein 19b [Drosophila melanogaster]
ACY93469.1 odorant binding protein 19b [Drosophila melanogaster]
ACY93468.1 odorant binding protein 19b [Drosophila melanogaster]
ACY93467.1 odorant binding protein 19b [Drosophila melanogaster]
ACY93466.1 odorant binding protein 19b [Drosophila melanogaster]
ACY93465.1 odorant binding protein 19b [Drosophila melanogaster]
ACY93464.1 odorant binding protein 19b [Drosophila melanogaster]
ACY93463.1 odorant binding protein 19b [Drosophila melanogaster]
ACY93462.1 odorant binding protein 19b [Drosophila melanogaster]
ACY93461.1 odorant binding protein 19b [Drosophila melanogaster]
ACY93460.1 odorant binding protein 19b [Drosophila melanogaster]
ACY93459.1 odorant binding protein 19b [Drosophila melanogaster]
ACY93458.1 odorant binding protein 19b [Drosophila melanogaster]
ACY93457.1 odorant binding protein 19b [Drosophila melanogaster]
ACY93456.1 odorant binding protein 19b [Drosophila melanogaster]
ACY93455.1 odorant binding protein 19b [Drosophila melanogaster]
ACY93454.1 odorant binding protein 19b [Drosophila melanogaster]
ACY93453.1 odorant binding protein 19b [Drosophila melanogaster]
ACY93452.1 odorant binding protein 19b [Drosophila melanogaster]
ACY93451.1 odorant binding protein 19b [Drosophila melanogaster]
ACY93450.1 odorant binding protein 19b [Drosophila melanogaster]
ACY93449.1 odorant binding protein 19b [Drosophila melanogaster]
ACY93448.1 odorant binding protein 19b [Drosophila melanogaster]
ACY93447.1 odorant binding protein 19b [Drosophila melanogaster]
ACY93446.1 odorant binding protein 19b [Drosophila melanogaster]
ACY93445.1 odorant binding protein 19b [Drosophila melanogaster]
ACY93444.1 odorant binding protein 19b [Drosophila melanogaster]
ACY93443.1 odorant binding protein 19b [Drosophila melanogaster]
ACY93442.1 odorant binding protein 19b [Drosophila melanogaster]
ACY93441.1 odorant binding protein 19b [Drosophila melanogaster]
ACY93440.1 odorant binding protein 19b [Drosophila melanogaster]
ACY93439.1 odorant binding protein 19b [Drosophila melanogaster]
ACY93438.1 odorant binding protein 19b [Drosophila melanogaster]
ACY93437.1 odorant binding protein 19b [Drosophila melanogaster]
ACY93436.1 odorant binding protein 19b [Drosophila melanogaster]
ACY93435.1 odorant binding protein 19b [Drosophila melanogaster]
ACY93434.1 odorant binding protein 19b [Drosophila melanogaster]
ACY93433.1 odorant binding protein 19b [Drosophila melanogaster]
ACY93432.1 odorant binding protein 19b [Drosophila melanogaster]
ACY93431.1 odorant binding protein 19b [Drosophila melanogaster]
ACY93430.1 odorant binding protein 19b [Drosophila melanogaster]
ACY93429.1 odorant binding protein 19b [Drosophila melanogaster]
ACY93428.1 odorant binding protein 19b [Drosophila melanogaster]
ACY93427.1 odorant binding protein 19b [Drosophila melanogaster]
ACY93426.1 odorant binding protein 19b [Drosophila melanogaster]
ACY93425.1 odorant binding protein 19b [Drosophila melanogaster]
ACY93424.1 odorant binding protein 19b [Drosophila melanogaster]
ACY93423.1 odorant binding protein 19b [Drosophila melanogaster]
ACY93422.1 odorant binding protein 19b [Drosophila melanogaster]
ACY93421.1 odorant binding protein 19b [Drosophila melanogaster]
ACY93420.1 odorant binding protein 19b [Drosophila melanogaster]
ACY93419.1 odorant binding protein 19b [Drosophila melanogaster]
ACY93418.1 odorant binding protein 19b [Drosophila melanogaster]
ACY93417.1 odorant binding protein 19b [Drosophila melanogaster]
ACY93416.1 odorant binding protein 19b [Drosophila melanogaster]
ACY93415.1 odorant binding protein 19b [Drosophila melanogaster]
ACY93414.1 odorant binding protein 19b [Drosophila melanogaster]
ACY93413.1 odorant binding protein 19b [Drosophila melanogaster]
ACY93412.1 odorant binding protein 19b [Drosophila melanogaster]
ACY93411.1 odorant binding protein 19b [Drosophila melanogaster]
ACY93410.1 odorant binding protein 19b [Drosophila melanogaster]
ACY93409.1 odorant binding protein 19b [Drosophila melanogaster]
ACY93408.1 odorant binding protein 19b [Drosophila melanogaster]
ACY93407.1 odorant binding protein 19b [Drosophila melanogaster]
ACY93406.1 odorant binding protein 19b [Drosophila melanogaster]
ACY93405.1 odorant binding protein 19b [Drosophila melanogaster]
ACY93404.1 odorant binding protein 19b [Drosophila melanogaster]
ACY93403.1 odorant binding protein 19b [Drosophila melanogaster]
ACY93402.1 odorant binding protein 19b [Drosophila melanogaster]
ACY93401.1 odorant binding protein 19b [Drosophila melanogaster]
ACY93400.1 odorant binding protein 19b [Drosophila melanogaster]
ACY93399.1 odorant binding protein 19b [Drosophila melanogaster]
ACY93398.1 odorant binding protein 19b [Drosophila melanogaster]
ACY93397.1 odorant binding protein 19b [Drosophila melanogaster]
ACY93396.1 odorant binding protein 19b [Drosophila melanogaster]
ACY93395.1 odorant binding protein 19b [Drosophila melanogaster]
ACY93394.1 odorant binding protein 19b [Drosophila melanogaster]
ACY93393.1 odorant binding protein 19b [Drosophila melanogaster]
ACY93392.1 odorant binding protein 19b [Drosophila melanogaster]
ACY93391.1 odorant binding protein 19b [Drosophila melanogaster]
ACY93390.1 odorant binding protein 19b [Drosophila melanogaster]
ACY93389.1 odorant binding protein 19b [Drosophila melanogaster]
ACY93388.1 odorant binding protein 19b [Drosophila melanogaster]
ACY93387.1 odorant binding protein 19b [Drosophila melanogaster]
ACY93386.1 odorant binding protein 19b [Drosophila melanogaster]
ACY93385.1 odorant binding protein 19b [Drosophila melanogaster]
ACY93384.1 odorant binding protein 19b [Drosophila melanogaster]
ACY93383.1 odorant binding protein 19b [Drosophila melanogaster]
ACY93382.1 odorant binding protein 19b [Drosophila melanogaster]
ACY93381.1 odorant binding protein 19b [Drosophila melanogaster]
ACY93380.1 odorant binding protein 19b [Drosophila melanogaster]
ACY93379.1 odorant binding protein 19b [Drosophila melanogaster]
ACY93378.1 odorant binding protein 19b [Drosophila melanogaster]
ACY93377.1 odorant binding protein 19b [Drosophila melanogaster]
ACY93376.1 odorant binding protein 19b [Drosophila melanogaster]
ACY93375.1 odorant binding protein 19b [Drosophila melanogaster]
ACY93374.1 odorant binding protein 19b [Drosophila melanogaster]
ACY93373.1 odorant binding protein 19b [Drosophila melanogaster]
ACY93372.1 odorant binding protein 19b [Drosophila melanogaster]
ACY93371.1 odorant binding protein 19b [Drosophila melanogaster]
ACY93370.1 odorant binding protein 19b [Drosophila melanogaster]
ACY93369.1 odorant binding protein 19b [Drosophila melanogaster]
ACY93368.1 odorant binding protein 19b [Drosophila melanogaster]
ACY93367.1 odorant binding protein 19b [Drosophila melanogaster]
ACY93366.1 odorant binding protein 19b [Drosophila melanogaster]
ACY93365.1 odorant binding protein 19b [Drosophila melanogaster]
ACY93364.1 odorant binding protein 19b [Drosophila melanogaster]
ACY93363.1 odorant binding protein 19b [Drosophila melanogaster]
ACY93362.1 odorant binding protein 19b [Drosophila melanogaster]
ACY93361.1 odorant binding protein 19b [Drosophila melanogaster]
ACY93360.1 odorant binding protein 19b [Drosophila melanogaster]
ACY93359.1 odorant binding protein 19b [Drosophila melanogaster]
ACY93358.1 odorant binding protein 19b [Drosophila melanogaster]
ACY93357.1 odorant binding protein 19b [Drosophila melanogaster]
ACY93356.1 odorant binding protein 19b [Drosophila melanogaster]
ACY93355.1 odorant binding protein 19b [Drosophila melanogaster]
ACY93354.1 odorant binding protein 19b [Drosophila melanogaster]
ACY93353.1 odorant binding protein 19b [Drosophila melanogaster]
ACY93352.1 odorant binding protein 19b [Drosophila melanogaster]
ACY93351.1 odorant binding protein 19b [Drosophila melanogaster]
ACY93350.1 odorant binding protein 19b [Drosophila melanogaster]
ACY93349.1 odorant binding protein 19b [Drosophila melanogaster]
ACY93348.1 odorant binding protein 19b [Drosophila melanogaster]
ACY93347.1 odorant binding protein 19b [Drosophila melanogaster]
ACY93346.1 odorant binding protein 19b [Drosophila melanogaster]
ACY93345.1 odorant binding protein 19b [Drosophila melanogaster]
ACY93344.1 odorant binding protein 19b [Drosophila melanogaster]
ACY93343.1 odorant binding protein 19b [Drosophila melanogaster]
ACY93342.1 odorant binding protein 19b [Drosophila melanogaster]
ACY93341.1 odorant binding protein 19b [Drosophila melanogaster]
ACY93340.1 odorant binding protein 19b [Drosophila melanogaster]
ACY93339.1 odorant binding protein 19b [Drosophila melanogaster]
ACY93338.1 odorant binding protein 19b [Drosophila melanogaster]
ACY93337.1 odorant binding protein 19b [Drosophila melanogaster]
ACY93336.1 odorant binding protein 19b [Drosophila melanogaster]
ACY93335.1 odorant binding protein 19b [Drosophila melanogaster]
ACY93334.1 odorant binding protein 19b [Drosophila melanogaster]
ACY93333.1 odorant binding protein 19b [Drosophila melanogaster]
ACY93332.1 odorant binding protein 19b [Drosophila melanogaster]
ACY93331.1 odorant binding protein 19b [Drosophila melanogaster]
ACY93330.1 odorant binding protein 19b [Drosophila melanogaster]
ACY93329.1 odorant binding protein 19b [Drosophila melanogaster]
ACY93328.1 odorant binding protein 19b [Drosophila melanogaster]
ACY93327.1 odorant binding protein 19b [Drosophila melanogaster]
ACY93326.1 odorant binding protein 19b [Drosophila melanogaster]
ACY93325.1 odorant binding protein 19b [Drosophila melanogaster]
ACY93324.1 odorant binding protein 19a [Drosophila melanogaster]
ACY93323.1 odorant binding protein 19a [Drosophila melanogaster]
ACY93322.1 odorant binding protein 19a [Drosophila melanogaster]
ACY93321.1 odorant binding protein 19a [Drosophila melanogaster]
ACY93320.1 odorant binding protein 19a [Drosophila melanogaster]
ACY93319.1 odorant binding protein 19a [Drosophila melanogaster]
ACY93318.1 odorant binding protein 19a [Drosophila melanogaster]
ACY93317.1 odorant binding protein 19a [Drosophila melanogaster]
ACY93316.1 odorant binding protein 19a [Drosophila melanogaster]
ACY93315.1 odorant binding protein 19a [Drosophila melanogaster]
ACY93314.1 odorant binding protein 19a [Drosophila melanogaster]
ACY93313.1 odorant binding protein 19a [Drosophila melanogaster]
ACY93312.1 odorant binding protein 19a [Drosophila melanogaster]
ACY93311.1 odorant binding protein 19a [Drosophila melanogaster]
ACY93310.1 odorant binding protein 19a [Drosophila melanogaster]
ACY93309.1 odorant binding protein 19a [Drosophila melanogaster]
ACY93308.1 odorant binding protein 19a [Drosophila melanogaster]
ACY93307.1 odorant binding protein 19a [Drosophila melanogaster]
ACY93306.1 odorant binding protein 19a [Drosophila melanogaster]
ACY93305.1 odorant binding protein 19a [Drosophila melanogaster]
ACY93304.1 odorant binding protein 19a [Drosophila melanogaster]
ACY93303.1 odorant binding protein 19a [Drosophila melanogaster]
ACY93302.1 odorant binding protein 19a [Drosophila melanogaster]
ACY93301.1 odorant binding protein 19a [Drosophila melanogaster]
ACY93300.1 odorant binding protein 19a [Drosophila melanogaster]
ACY93299.1 odorant binding protein 19a [Drosophila melanogaster]
ACY93298.1 odorant binding protein 19a [Drosophila melanogaster]
ACY93297.1 odorant binding protein 19a [Drosophila melanogaster]
ACY93296.1 odorant binding protein 19a [Drosophila melanogaster]
ACY93295.1 odorant binding protein 19a [Drosophila melanogaster]
ACY93294.1 odorant binding protein 19a [Drosophila melanogaster]
ACY93293.1 odorant binding protein 19a [Drosophila melanogaster]
ACY93292.1 odorant binding protein 19a [Drosophila melanogaster]
ACY93291.1 odorant binding protein 19a [Drosophila melanogaster]
ACY93290.1 odorant binding protein 19a [Drosophila melanogaster]
ACY93289.1 odorant binding protein 19a [Drosophila melanogaster]
ACY93288.1 odorant binding protein 19a [Drosophila melanogaster]
ACY93287.1 odorant binding protein 19a [Drosophila melanogaster]
ACY93286.1 odorant binding protein 19a [Drosophila melanogaster]
ACY93285.1 odorant binding protein 19a [Drosophila melanogaster]
ACY93284.1 odorant binding protein 19a [Drosophila melanogaster]
ACY93283.1 odorant binding protein 19a [Drosophila melanogaster]
ACY93282.1 odorant binding protein 19a [Drosophila melanogaster]
ACY93281.1 odorant binding protein 19a [Drosophila melanogaster]
ACY93280.1 odorant binding protein 19a [Drosophila melanogaster]
ACY93279.1 odorant binding protein 19a [Drosophila melanogaster]
ACY93278.1 odorant binding protein 19a [Drosophila melanogaster]
ACY93277.1 odorant binding protein 19a [Drosophila melanogaster]
ACY93276.1 odorant binding protein 19a [Drosophila melanogaster]
ACY93275.1 odorant binding protein 19a [Drosophila melanogaster]
ACY93274.1 odorant binding protein 19a [Drosophila melanogaster]
ACY93273.1 odorant binding protein 19a [Drosophila melanogaster]
ACY93272.1 odorant binding protein 19a [Drosophila melanogaster]
ACY93271.1 odorant binding protein 19a [Drosophila melanogaster]
ACY93270.1 odorant binding protein 19a [Drosophila melanogaster]
ACY93269.1 odorant binding protein 19a [Drosophila melanogaster]
ACY93268.1 odorant binding protein 19a [Drosophila melanogaster]
ACY93267.1 odorant binding protein 19a [Drosophila melanogaster]
ACY93266.1 odorant binding protein 19a [Drosophila melanogaster]
ACY93265.1 odorant binding protein 19a [Drosophila melanogaster]
ACY93264.1 odorant binding protein 19a [Drosophila melanogaster]
ACY93263.1 odorant binding protein 19a [Drosophila melanogaster]
ACY93262.1 odorant binding protein 19a [Drosophila melanogaster]
ACY93261.1 odorant binding protein 19a [Drosophila melanogaster]
ACY93260.1 odorant binding protein 19a [Drosophila melanogaster]
ACY93259.1 odorant binding protein 19a [Drosophila melanogaster]
ACY93258.1 odorant binding protein 19a [Drosophila melanogaster]
ACY93257.1 odorant binding protein 19a [Drosophila melanogaster]
ACY93256.1 odorant binding protein 19a [Drosophila melanogaster]
ACY93255.1 odorant binding protein 19a [Drosophila melanogaster]
ACY93254.1 odorant binding protein 19a [Drosophila melanogaster]
ACY93253.1 odorant binding protein 19a [Drosophila melanogaster]
ACY93252.1 odorant binding protein 19a [Drosophila melanogaster]
ACY93251.1 odorant binding protein 19a [Drosophila melanogaster]
ACY93250.1 odorant binding protein 19a [Drosophila melanogaster]
ACY93249.1 odorant binding protein 19a [Drosophila melanogaster]
ACY93248.1 odorant binding protein 19a [Drosophila melanogaster]
ACY93247.1 odorant binding protein 19a [Drosophila melanogaster]
ACY93246.1 odorant binding protein 19a [Drosophila melanogaster]
ACY93245.1 odorant binding protein 19a [Drosophila melanogaster]
ACY93244.1 odorant binding protein 19a [Drosophila melanogaster]
ACY93243.1 odorant binding protein 19a [Drosophila melanogaster]
ACY93242.1 odorant binding protein 19a [Drosophila melanogaster]
ACY93241.1 odorant binding protein 19a [Drosophila melanogaster]
ACY93240.1 odorant binding protein 19a [Drosophila melanogaster]
ACY93239.1 odorant binding protein 19a [Drosophila melanogaster]
ACY93238.1 odorant binding protein 19a [Drosophila melanogaster]
ACY93237.1 odorant binding protein 19a [Drosophila melanogaster]
ACY93236.1 odorant binding protein 19a [Drosophila melanogaster]
ACY93235.1 odorant binding protein 19a [Drosophila melanogaster]
ACY93234.1 odorant binding protein 19a [Drosophila melanogaster]
ACY93233.1 odorant binding protein 19a [Drosophila melanogaster]
ACY93232.1 odorant binding protein 19a [Drosophila melanogaster]
ACY93231.1 odorant binding protein 19a [Drosophila melanogaster]
ACY93230.1 odorant binding protein 19a [Drosophila melanogaster]
ACY93229.1 odorant binding protein 19a [Drosophila melanogaster]
ACY93228.1 odorant binding protein 19a [Drosophila melanogaster]
ACY93227.1 odorant binding protein 19a [Drosophila melanogaster]
ACY93226.1 odorant binding protein 19a [Drosophila melanogaster]
ACY93225.1 odorant binding protein 19a [Drosophila melanogaster]
ACY93224.1 odorant binding protein 19a [Drosophila melanogaster]
ACY93223.1 odorant binding protein 19a [Drosophila melanogaster]
ACY93222.1 odorant binding protein 19a [Drosophila melanogaster]
ACY93221.1 odorant binding protein 19a [Drosophila melanogaster]
ACY93220.1 odorant binding protein 19a [Drosophila melanogaster]
ACY93219.1 odorant binding protein 19a [Drosophila melanogaster]
ACY93218.1 odorant binding protein 19a [Drosophila melanogaster]
ACY93217.1 odorant binding protein 19a [Drosophila melanogaster]
ACY93216.1 odorant binding protein 19a [Drosophila melanogaster]
ACY93215.1 odorant binding protein 19a [Drosophila melanogaster]
ACY93214.1 odorant binding protein 19a [Drosophila melanogaster]
ACY93213.1 odorant binding protein 19a [Drosophila melanogaster]
ACY93212.1 odorant binding protein 19a [Drosophila melanogaster]
ACY93211.1 odorant binding protein 19a [Drosophila melanogaster]
ACY93210.1 odorant binding protein 19a [Drosophila melanogaster]
ACY93209.1 odorant binding protein 19a [Drosophila melanogaster]
ACY93208.1 odorant binding protein 19a [Drosophila melanogaster]
ACY93207.1 odorant binding protein 19a [Drosophila melanogaster]
ACY93206.1 odorant binding protein 19a [Drosophila melanogaster]
ACY93205.1 odorant binding protein 19a [Drosophila melanogaster]
ACY93204.1 odorant binding protein 19a [Drosophila melanogaster]
ACY93203.1 odorant binding protein 19a [Drosophila melanogaster]
ACY93202.1 odorant binding protein 19a [Drosophila melanogaster]
ACY93201.1 odorant binding protein 19a [Drosophila melanogaster]
ACY93200.1 odorant binding protein 19a [Drosophila melanogaster]
ACY93199.1 odorant binding protein 19a [Drosophila melanogaster]
ACY93198.1 odorant binding protein 19a [Drosophila melanogaster]
ACY93197.1 odorant binding protein 19a [Drosophila melanogaster]
ACY93196.1 odorant binding protein 19a [Drosophila melanogaster]
ACY93195.1 odorant binding protein 19a [Drosophila melanogaster]
ACY93194.1 odorant binding protein 19a [Drosophila melanogaster]
ACY93193.1 odorant binding protein 19a [Drosophila melanogaster]
ACY93192.1 odorant binding protein 19a [Drosophila melanogaster]
ACY93191.1 odorant binding protein 19a [Drosophila melanogaster]
ACY93190.1 odorant binding protein 19a [Drosophila melanogaster]
ACY93189.1 odorant binding protein 19a [Drosophila melanogaster]
ACY93188.1 odorant binding protein 19a [Drosophila melanogaster]
ACY93187.1 odorant binding protein 19a [Drosophila melanogaster]
ACY93186.1 odorant binding protein 19a [Drosophila melanogaster]
ACY93185.1 odorant binding protein 19a [Drosophila melanogaster]
ACY93184.1 odorant binding protein 19a [Drosophila melanogaster]
ACY93183.1 odorant binding protein 19a [Drosophila melanogaster]
ACY93182.1 odorant binding protein 19a [Drosophila melanogaster]
ACY93181.1 odorant binding protein 19a [Drosophila melanogaster]
ACY93180.1 odorant binding protein 19a [Drosophila melanogaster]
ACY93179.1 odorant binding protein 19a [Drosophila melanogaster]
ACY93178.1 odorant binding protein 19a [Drosophila melanogaster]
ACY93177.1 odorant binding protein 19a [Drosophila melanogaster]
ACY93176.1 odorant binding protein 19a [Drosophila melanogaster]
ACY93175.1 odorant binding protein 19a [Drosophila melanogaster]
ACY93174.1 odorant binding protein 19a [Drosophila melanogaster]
ACY93173.1 odorant binding protein 19a [Drosophila melanogaster]
ACY93172.1 odorant binding protein 19a [Drosophila melanogaster]
ACY93171.1 odorant binding protein 19a [Drosophila melanogaster]
ACY93170.1 odorant binding protein 19a [Drosophila melanogaster]
ACY93169.1 odorant binding protein 19a [Drosophila melanogaster]
ACY93168.1 odorant binding protein 19a [Drosophila melanogaster]
ACY93167.1 odorant binding protein 19a [Drosophila melanogaster]
ACY93166.1 odorant binding protein 19a [Drosophila melanogaster]
ACY93165.1 odorant binding protein 19a [Drosophila melanogaster]
ACY93164.1 odorant binding protein 19a [Drosophila melanogaster]
ACY93163.1 odorant binding protein 19a [Drosophila melanogaster]
ACY93162.1 odorant binding protein 19a [Drosophila melanogaster]
ACY93161.1 odorant binding protein 19a [Drosophila melanogaster]
ACY93160.1 odorant binding protein 19a [Drosophila melanogaster]
ACY93159.1 odorant binding protein 19a [Drosophila melanogaster]
ACY93158.1 odorant binding protein 19a [Drosophila melanogaster]
ACY93157.1 odorant binding protein 19a [Drosophila melanogaster]
ACY93156.1 odorant binding protein 19a [Drosophila melanogaster]
ACY93155.1 odorant binding protein 19a [Drosophila melanogaster]
ACY93154.1 odorant binding protein 19a [Drosophila melanogaster]
ACY93153.1 odorant binding protein 19a [Drosophila melanogaster]
ACY93152.1 odorant binding protein 19a [Drosophila melanogaster]
ACY93151.1 odorant binding protein 19a [Drosophila melanogaster]
ACY93150.1 odorant binding protein 19a [Drosophila melanogaster]
ACY93149.1 odorant binding protein 19a [Drosophila melanogaster]
ACY93148.1 odorant binding protein 19a [Drosophila melanogaster]
ACY93147.1 odorant binding protein 19a [Drosophila melanogaster]
ACY93146.1 odorant binding protein 19a [Drosophila melanogaster]
ACY93145.1 odorant binding protein 19a [Drosophila melanogaster]
ACY93144.1 odorant binding protein 19a [Drosophila melanogaster]
ACY93143.1 odorant binding protein 19a [Drosophila melanogaster]
ACY93142.1 odorant binding protein 19a [Drosophila melanogaster]
ACY93141.1 odorant binding protein 19a [Drosophila melanogaster]
ACY93140.1 odorant binding protein 19a [Drosophila melanogaster]
ACY93139.1 odorant binding protein 19a [Drosophila melanogaster]
ACY93138.1 odorant binding protein 19a [Drosophila melanogaster]
ACY93137.1 odorant binding protein 19a [Drosophila melanogaster]
ACY93136.1 odorant binding protein 19a [Drosophila melanogaster]
ACY93135.1 odorant binding protein 19a [Drosophila melanogaster]
ACY93134.1 odorant binding protein 19a [Drosophila melanogaster]
ACY93133.1 odorant binding protein 19a [Drosophila melanogaster]
ACY93132.1 odorant binding protein 19a [Drosophila melanogaster]
ACY93131.1 odorant binding protein 19a [Drosophila melanogaster]
ACY93130.1 odorant binding protein 19a [Drosophila melanogaster]
ACY93129.1 odorant binding protein 19a [Drosophila melanogaster]
ACY93128.1 odorant binding protein 19a [Drosophila melanogaster]
ACY93127.1 odorant binding protein 19a [Drosophila melanogaster]
ACY93126.1 odorant binding protein 19a [Drosophila melanogaster]
ACY93125.1 odorant binding protein 19a [Drosophila melanogaster]
ACY93124.1 odorant binding protein 19a [Drosophila melanogaster]
ACY93123.1 odorant binding protein 19a [Drosophila melanogaster]
ACY93122.1 odorant binding protein 19a [Drosophila melanogaster]
ACY93121.1 odorant binding protein 19a [Drosophila melanogaster]
ACY93120.1 odorant binding protein 19a [Drosophila melanogaster]
ACY93119.1 odorant binding protein 19a [Drosophila melanogaster]
ACY93118.1 odorant binding protein 19a [Drosophila melanogaster]
ACY93117.1 odorant binding protein 19a [Drosophila melanogaster]
ACY93116.1 odorant binding protein 19a [Drosophila melanogaster]
ACY93115.1 odorant binding protein 19a [Drosophila melanogaster]
ACY93114.1 odorant binding protein 19a [Drosophila melanogaster]
ACY93113.1 odorant binding protein 19a [Drosophila melanogaster]
ACY93112.1 odorant binding protein 19a [Drosophila melanogaster]
ACY93111.1 odorant binding protein 19a [Drosophila melanogaster]
ACY93110.1 odorant binding protein 19a [Drosophila melanogaster]
ACY93109.1 odorant binding protein 19a [Drosophila melanogaster]
ACY93108.1 odorant binding protein 18a [Drosophila melanogaster]
ACY93107.1 odorant binding protein 18a [Drosophila melanogaster]
ACY93106.1 odorant binding protein 18a [Drosophila melanogaster]
ACY93105.1 odorant binding protein 18a [Drosophila melanogaster]
ACY93104.1 odorant binding protein 18a [Drosophila melanogaster]
ACY93103.1 odorant binding protein 18a [Drosophila melanogaster]
ACY93102.1 odorant binding protein 18a [Drosophila melanogaster]
ACY93101.1 odorant binding protein 18a [Drosophila melanogaster]
ACY93100.1 odorant binding protein 18a [Drosophila melanogaster]
ACY93099.1 odorant binding protein 18a [Drosophila melanogaster]
ACY93098.1 odorant binding protein 18a [Drosophila melanogaster]
ACY93097.1 odorant binding protein 18a [Drosophila melanogaster]
ACY93096.1 odorant binding protein 18a [Drosophila melanogaster]
ACY93095.1 odorant binding protein 18a [Drosophila melanogaster]
ACY93094.1 odorant binding protein 18a [Drosophila melanogaster]
ACY93093.1 odorant binding protein 18a [Drosophila melanogaster]
ACY93092.1 odorant binding protein 18a [Drosophila melanogaster]
ACY93091.1 odorant binding protein 18a [Drosophila melanogaster]
ACY93090.1 odorant binding protein 18a [Drosophila melanogaster]
ACY93089.1 odorant binding protein 18a [Drosophila melanogaster]
ACY93088.1 odorant binding protein 18a [Drosophila melanogaster]
ACY93087.1 odorant binding protein 18a [Drosophila melanogaster]
ACY93086.1 odorant binding protein 18a [Drosophila melanogaster]
ACY93085.1 odorant binding protein 18a [Drosophila melanogaster]
ACY93084.1 odorant binding protein 18a [Drosophila melanogaster]
ACY93083.1 odorant binding protein 18a [Drosophila melanogaster]
ACY93082.1 odorant binding protein 18a [Drosophila melanogaster]
ACY93081.1 odorant binding protein 18a [Drosophila melanogaster]
ACY93080.1 odorant binding protein 18a [Drosophila melanogaster]
ACY93079.1 odorant binding protein 18a [Drosophila melanogaster]
ACY93078.1 odorant binding protein 18a [Drosophila melanogaster]
ACY93077.1 odorant binding protein 18a [Drosophila melanogaster]
ACY93076.1 odorant binding protein 18a [Drosophila melanogaster]
ACY93075.1 odorant binding protein 18a [Drosophila melanogaster]
ACY93074.1 odorant binding protein 18a [Drosophila melanogaster]
ACY93073.1 odorant binding protein 18a [Drosophila melanogaster]
ACY93072.1 odorant binding protein 18a [Drosophila melanogaster]
ACY93071.1 odorant binding protein 18a [Drosophila melanogaster]
ACY93070.1 odorant binding protein 18a [Drosophila melanogaster]
ACY93069.1 odorant binding protein 18a [Drosophila melanogaster]
ACY93068.1 odorant binding protein 18a [Drosophila melanogaster]
ACY93067.1 odorant binding protein 18a [Drosophila melanogaster]
ACY93066.1 odorant binding protein 18a [Drosophila melanogaster]
ACY93065.1 odorant binding protein 18a [Drosophila melanogaster]
ACY93064.1 odorant binding protein 18a [Drosophila melanogaster]
ACY93063.1 odorant binding protein 18a [Drosophila melanogaster]
ACY93062.1 odorant binding protein 18a [Drosophila melanogaster]
ACY93061.1 odorant binding protein 18a [Drosophila melanogaster]
ACY93060.1 odorant binding protein 18a [Drosophila melanogaster]
ACY93059.1 odorant binding protein 18a [Drosophila melanogaster]
ACY93058.1 odorant binding protein 18a [Drosophila melanogaster]
ACY93057.1 odorant binding protein 18a [Drosophila melanogaster]
ACY93056.1 odorant binding protein 18a [Drosophila melanogaster]
ACY93055.1 odorant binding protein 18a [Drosophila melanogaster]
ACY93054.1 odorant binding protein 18a [Drosophila melanogaster]
ACY93053.1 odorant binding protein 18a [Drosophila melanogaster]
ACY93052.1 odorant binding protein 18a [Drosophila melanogaster]
ACY93051.1 odorant binding protein 18a [Drosophila melanogaster]
ACY93050.1 odorant binding protein 18a [Drosophila melanogaster]
ACY93049.1 odorant binding protein 18a [Drosophila melanogaster]
ACY93048.1 odorant binding protein 18a [Drosophila melanogaster]
ACY93047.1 odorant binding protein 18a [Drosophila melanogaster]
ACY93046.1 odorant binding protein 18a [Drosophila melanogaster]
ACY93045.1 odorant binding protein 18a [Drosophila melanogaster]
ACY93044.1 odorant binding protein 18a [Drosophila melanogaster]
ACY93043.1 odorant binding protein 18a [Drosophila melanogaster]
ACY93042.1 odorant binding protein 18a [Drosophila melanogaster]
ACY93041.1 odorant binding protein 18a [Drosophila melanogaster]
ACY93040.1 odorant binding protein 18a [Drosophila melanogaster]
ACY93039.1 odorant binding protein 18a [Drosophila melanogaster]
ACY93038.1 odorant binding protein 18a [Drosophila melanogaster]
ACY93037.1 odorant binding protein 18a [Drosophila melanogaster]
ACY93036.1 odorant binding protein 18a [Drosophila melanogaster]
ACY93035.1 odorant binding protein 18a [Drosophila melanogaster]
ACY93034.1 odorant binding protein 18a [Drosophila melanogaster]
ACY93033.1 odorant binding protein 18a [Drosophila melanogaster]
ACY93032.1 odorant binding protein 18a [Drosophila melanogaster]
ACY93031.1 odorant binding protein 18a [Drosophila melanogaster]
ACY93030.1 odorant binding protein 18a [Drosophila melanogaster]
ACY93029.1 odorant binding protein 18a [Drosophila melanogaster]
ACY93028.1 odorant binding protein 18a [Drosophila melanogaster]
ACY93027.1 odorant binding protein 18a [Drosophila melanogaster]
ACY93026.1 odorant binding protein 18a [Drosophila melanogaster]
ACY93025.1 odorant binding protein 18a [Drosophila melanogaster]
ACY93024.1 odorant binding protein 18a [Drosophila melanogaster]
ACY93023.1 odorant binding protein 18a [Drosophila melanogaster]
ACY93022.1 odorant binding protein 18a [Drosophila melanogaster]
ACY93021.1 odorant binding protein 18a [Drosophila melanogaster]
ACY93020.1 odorant binding protein 18a [Drosophila melanogaster]
ACY93019.1 odorant binding protein 18a [Drosophila melanogaster]
ACY93018.1 odorant binding protein 18a [Drosophila melanogaster]
ACY93017.1 odorant binding protein 18a [Drosophila melanogaster]
ACY93016.1 odorant binding protein 18a [Drosophila melanogaster]
ACY93015.1 odorant binding protein 18a [Drosophila melanogaster]
ACY93014.1 odorant binding protein 18a [Drosophila melanogaster]
ACY93013.1 odorant binding protein 18a [Drosophila melanogaster]
ACY93012.1 odorant binding protein 18a [Drosophila melanogaster]
ACY93011.1 odorant binding protein 18a [Drosophila melanogaster]
ACY93010.1 odorant binding protein 18a [Drosophila melanogaster]
ACY93009.1 odorant binding protein 18a [Drosophila melanogaster]
ACY93008.1 odorant binding protein 18a [Drosophila melanogaster]
ACY93007.1 odorant binding protein 18a [Drosophila melanogaster]
ACY93006.1 odorant binding protein 18a [Drosophila melanogaster]
ACY93005.1 odorant binding protein 18a [Drosophila melanogaster]
ACY93004.1 odorant binding protein 18a [Drosophila melanogaster]
ACY93003.1 odorant binding protein 18a [Drosophila melanogaster]
ACY93002.1 odorant binding protein 18a [Drosophila melanogaster]
ACY93001.1 odorant binding protein 18a [Drosophila melanogaster]
ACY93000.1 odorant binding protein 18a [Drosophila melanogaster]
ACY92999.1 odorant binding protein 18a [Drosophila melanogaster]
ACY92998.1 odorant binding protein 18a [Drosophila melanogaster]
ACY92997.1 odorant binding protein 18a [Drosophila melanogaster]
ACY92996.1 odorant binding protein 18a [Drosophila melanogaster]
ACY92995.1 odorant binding protein 18a [Drosophila melanogaster]
ACY92994.1 odorant binding protein 18a [Drosophila melanogaster]
ACY92993.1 odorant binding protein 18a [Drosophila melanogaster]
ACY92992.1 odorant binding protein 18a [Drosophila melanogaster]
ACY92991.1 odorant binding protein 18a [Drosophila melanogaster]
ACY92990.1 odorant binding protein 18a [Drosophila melanogaster]
ACY92989.1 odorant binding protein 18a [Drosophila melanogaster]
ACY92988.1 odorant binding protein 18a [Drosophila melanogaster]
ACY92987.1 odorant binding protein 18a [Drosophila melanogaster]
ACY92986.1 odorant binding protein 18a [Drosophila melanogaster]
ACY92985.1 odorant binding protein 18a [Drosophila melanogaster]
ACY92984.1 odorant binding protein 18a [Drosophila melanogaster]
ACY92983.1 odorant binding protein 18a [Drosophila melanogaster]
ACY92982.1 odorant binding protein 18a [Drosophila melanogaster]
ACY92981.1 odorant binding protein 18a [Drosophila melanogaster]
ACY92980.1 odorant binding protein 18a [Drosophila melanogaster]
ACY92979.1 odorant binding protein 18a [Drosophila melanogaster]
ACY92978.1 odorant binding protein 18a [Drosophila melanogaster]
ACY92977.1 odorant binding protein 18a [Drosophila melanogaster]
ACY92976.1 odorant binding protein 18a [Drosophila melanogaster]
ACY92975.1 odorant binding protein 18a [Drosophila melanogaster]
ACY92974.1 odorant binding protein 18a [Drosophila melanogaster]
ACY92973.1 odorant binding protein 18a [Drosophila melanogaster]
ACY92972.1 odorant binding protein 18a [Drosophila melanogaster]
ACY92971.1 odorant binding protein 18a [Drosophila melanogaster]
ACY92970.1 odorant binding protein 18a [Drosophila melanogaster]
ACY92969.1 odorant binding protein 18a [Drosophila melanogaster]
ACY92968.1 odorant binding protein 18a [Drosophila melanogaster]
ACY92967.1 odorant binding protein 18a [Drosophila melanogaster]
ACY92966.1 odorant binding protein 18a [Drosophila melanogaster]
ACY92965.1 odorant binding protein 18a [Drosophila melanogaster]
ACY92964.1 odorant binding protein 18a [Drosophila melanogaster]
ACY92963.1 odorant binding protein 18a [Drosophila melanogaster]
ACY92962.1 odorant binding protein 18a [Drosophila melanogaster]
ACY92961.1 odorant binding protein 18a [Drosophila melanogaster]
ACY92960.1 odorant binding protein 18a [Drosophila melanogaster]
ACY92959.1 odorant binding protein 18a [Drosophila melanogaster]
ACY92958.1 odorant binding protein 18a [Drosophila melanogaster]
ACY92957.1 odorant binding protein 18a [Drosophila melanogaster]
ACY92956.1 odorant binding protein 18a [Drosophila melanogaster]
ACY92955.1 odorant binding protein 18a [Drosophila melanogaster]
ACY92954.1 odorant binding protein 18a [Drosophila melanogaster]
ACY92953.1 odorant binding protein 18a [Drosophila melanogaster]
ACY92952.1 odorant binding protein 18a [Drosophila melanogaster]
ACY92951.1 odorant binding protein 18a [Drosophila melanogaster]
ACY92950.1 odorant binding protein 18a [Drosophila melanogaster]
ACY92949.1 odorant binding protein 18a [Drosophila melanogaster]
ACY92948.1 odorant binding protein 18a [Drosophila melanogaster]
ACY92947.1 odorant binding protein 18a [Drosophila melanogaster]
ACY92946.1 odorant binding protein 18a [Drosophila melanogaster]
ACY92945.1 odorant binding protein 18a [Drosophila melanogaster]
ACY92944.1 odorant binding protein 18a [Drosophila melanogaster]
ACY92943.1 odorant binding protein 18a [Drosophila melanogaster]
ACY92942.1 odorant binding protein 18a [Drosophila melanogaster]
ACY92941.1 odorant binding protein 18a [Drosophila melanogaster]
ACY92940.1 odorant binding protein 18a [Drosophila melanogaster]
ACY92939.1 odorant binding protein 18a [Drosophila melanogaster]
ACY92938.1 odorant binding protein 18a [Drosophila melanogaster]
ACY92937.1 odorant binding protein 18a [Drosophila melanogaster]
ACY92936.1 odorant binding protein 18a [Drosophila melanogaster]
ACY92935.1 odorant binding protein 18a [Drosophila melanogaster]
ACY92934.1 odorant binding protein 18a [Drosophila melanogaster]
ACY92933.1 odorant binding protein 18a [Drosophila melanogaster]
ACY92932.1 odorant binding protein 18a [Drosophila melanogaster]
ACY92931.1 odorant binding protein 18a [Drosophila melanogaster]
ACY92930.1 odorant binding protein 18a [Drosophila melanogaster]
ACY92929.1 odorant binding protein 18a [Drosophila melanogaster]
ACY92928.1 odorant binding protein 18a [Drosophila melanogaster]
ACY92927.1 odorant binding protein 18a [Drosophila melanogaster]
ACY92926.1 odorant binding protein 18a [Drosophila melanogaster]
ACY92925.1 odorant binding protein 18a [Drosophila melanogaster]
ACY92924.1 odorant binding protein 18a [Drosophila melanogaster]
ACY92923.1 odorant binding protein 18a [Drosophila melanogaster]
ACY92922.1 odorant binding protein 18a [Drosophila melanogaster]
ACY92921.1 odorant binding protein 18a [Drosophila melanogaster]
ACY92920.1 odorant binding protein 18a [Drosophila melanogaster]
ACY92919.1 odorant binding protein 18a [Drosophila melanogaster]
ACY92918.1 odorant binding protein 18a [Drosophila melanogaster]
ACY92917.1 odorant binding protein 18a [Drosophila melanogaster]
ACY92916.1 odorant binding protein 18a [Drosophila melanogaster]
ACY92915.1 odorant binding protein 18a [Drosophila melanogaster]
ACY92914.1 odorant binding protein 18a [Drosophila melanogaster]
ACY92913.1 odorant binding protein 18a [Drosophila melanogaster]
ACY92912.1 odorant binding protein 18a [Drosophila melanogaster]
ACY92911.1 odorant binding protein 18a [Drosophila melanogaster]
ACY92910.1 odorant binding protein 18a [Drosophila melanogaster]
ACY92909.1 odorant binding protein 18a [Drosophila melanogaster]
ACY92908.1 odorant binding protein 18a [Drosophila melanogaster]
ACY92907.1 odorant binding protein 18a [Drosophila melanogaster]
ACY92906.1 odorant binding protein 18a [Drosophila melanogaster]
ACY92905.1 odorant binding protein 18a [Drosophila melanogaster]
ACY92904.1 odorant binding protein 8a [Drosophila melanogaster]
ACY92903.1 odorant binding protein 8a [Drosophila melanogaster]
ACY92902.1 odorant binding protein 8a [Drosophila melanogaster]
ACY92901.1 odorant binding protein 8a [Drosophila melanogaster]
ACY92900.1 odorant binding protein 8a [Drosophila melanogaster]
ACY92899.1 odorant binding protein 8a [Drosophila melanogaster]
ACY92898.1 odorant binding protein 8a [Drosophila melanogaster]
ACY92897.1 odorant binding protein 8a [Drosophila melanogaster]
ACY92896.1 odorant binding protein 8a [Drosophila melanogaster]
ACY92895.1 odorant binding protein 8a [Drosophila melanogaster]
ACY92894.1 odorant binding protein 8a [Drosophila melanogaster]
ACY92893.1 odorant binding protein 8a [Drosophila melanogaster]
ACY92892.1 odorant binding protein 8a [Drosophila melanogaster]
ACY92891.1 odorant binding protein 8a [Drosophila melanogaster]
ACY92890.1 odorant binding protein 8a [Drosophila melanogaster]
ACY92889.1 odorant binding protein 8a [Drosophila melanogaster]
ACY92888.1 odorant binding protein 8a [Drosophila melanogaster]
ACY92887.1 odorant binding protein 8a [Drosophila melanogaster]
ACY92886.1 odorant binding protein 8a [Drosophila melanogaster]
ACY92885.1 odorant binding protein 8a [Drosophila melanogaster]
ACY92884.1 odorant binding protein 8a [Drosophila melanogaster]
ACY92883.1 odorant binding protein 8a [Drosophila melanogaster]
ACY92882.1 odorant binding protein 8a [Drosophila melanogaster]
ACY92881.1 odorant binding protein 8a [Drosophila melanogaster]
ACY92880.1 odorant binding protein 8a [Drosophila melanogaster]
ACY92879.1 odorant binding protein 8a [Drosophila melanogaster]
ACY92878.1 odorant binding protein 8a [Drosophila melanogaster]
ACY92877.1 odorant binding protein 8a [Drosophila melanogaster]
ACY92876.1 odorant binding protein 8a [Drosophila melanogaster]
ACY92875.1 odorant binding protein 8a [Drosophila melanogaster]
ACY92874.1 odorant binding protein 8a [Drosophila melanogaster]
ACY92873.1 odorant binding protein 8a [Drosophila melanogaster]
ACY92872.1 odorant binding protein 8a [Drosophila melanogaster]
ACY92871.1 odorant binding protein 8a [Drosophila melanogaster]
ACY92870.1 odorant binding protein 8a [Drosophila melanogaster]
ACY92869.1 odorant binding protein 8a [Drosophila melanogaster]
ACY92868.1 odorant binding protein 8a [Drosophila melanogaster]
ACY92867.1 odorant binding protein 8a [Drosophila melanogaster]
ACY92866.1 odorant binding protein 8a [Drosophila melanogaster]
ACY92865.1 odorant binding protein 8a [Drosophila melanogaster]
ACY92864.1 odorant binding protein 8a [Drosophila melanogaster]
ACY92863.1 odorant binding protein 8a [Drosophila melanogaster]
ACY92862.1 odorant binding protein 8a [Drosophila melanogaster]
ACY92861.1 odorant binding protein 8a [Drosophila melanogaster]
ACY92860.1 odorant binding protein 8a [Drosophila melanogaster]
ACY92859.1 odorant binding protein 8a [Drosophila melanogaster]
ACY92858.1 odorant binding protein 8a [Drosophila melanogaster]
ACY92857.1 odorant binding protein 8a [Drosophila melanogaster]
ACY92856.1 odorant binding protein 8a [Drosophila melanogaster]
ACY92855.1 odorant binding protein 8a [Drosophila melanogaster]
ACY92854.1 odorant binding protein 8a [Drosophila melanogaster]
ACY92853.1 odorant binding protein 8a [Drosophila melanogaster]
ACY92852.1 odorant binding protein 8a [Drosophila melanogaster]
ACY92851.1 odorant binding protein 8a [Drosophila melanogaster]
ACY92850.1 odorant binding protein 8a [Drosophila melanogaster]
ACY92849.1 odorant binding protein 8a [Drosophila melanogaster]
ACY92848.1 odorant binding protein 8a [Drosophila melanogaster]
ACY92847.1 odorant binding protein 8a [Drosophila melanogaster]
ACY92846.1 odorant binding protein 8a [Drosophila melanogaster]
ACY92845.1 odorant binding protein 8a [Drosophila melanogaster]
ACY92844.1 odorant binding protein 8a [Drosophila melanogaster]
ACY92843.1 odorant binding protein 8a [Drosophila melanogaster]
ACY92842.1 odorant binding protein 8a [Drosophila melanogaster]
ACY92841.1 odorant binding protein 8a [Drosophila melanogaster]
ACY92840.1 odorant binding protein 8a [Drosophila melanogaster]
ACY92839.1 odorant binding protein 8a [Drosophila melanogaster]
ACY92838.1 odorant binding protein 8a [Drosophila melanogaster]
ACY92837.1 odorant binding protein 8a [Drosophila melanogaster]
ACY92836.1 odorant binding protein 8a [Drosophila melanogaster]
ACY92835.1 odorant binding protein 8a [Drosophila melanogaster]
ACY92834.1 odorant binding protein 8a [Drosophila melanogaster]
ACY92833.1 odorant binding protein 8a [Drosophila melanogaster]
ACY92832.1 odorant binding protein 8a [Drosophila melanogaster]
ACY92831.1 odorant binding protein 8a [Drosophila melanogaster]
ACY92830.1 odorant binding protein 8a [Drosophila melanogaster]
ACY92829.1 odorant binding protein 8a [Drosophila melanogaster]
ACY92828.1 odorant binding protein 8a [Drosophila melanogaster]
ACY92827.1 odorant binding protein 8a [Drosophila melanogaster]
ACY92826.1 odorant binding protein 8a [Drosophila melanogaster]
ACY92825.1 odorant binding protein 8a [Drosophila melanogaster]
ACY92824.1 odorant binding protein 8a [Drosophila melanogaster]
ACY92823.1 odorant binding protein 8a [Drosophila melanogaster]
ACY92822.1 odorant binding protein 8a [Drosophila melanogaster]
ACY92821.1 odorant binding protein 8a [Drosophila melanogaster]
ACY92820.1 odorant binding protein 8a [Drosophila melanogaster]
ACY92819.1 odorant binding protein 8a [Drosophila melanogaster]
ACY92818.1 odorant binding protein 8a [Drosophila melanogaster]
ACY92817.1 odorant binding protein 8a [Drosophila melanogaster]
ACY92816.1 odorant binding protein 8a [Drosophila melanogaster]
ACY92815.1 odorant binding protein 8a [Drosophila melanogaster]
ACY92814.1 odorant binding protein 8a [Drosophila melanogaster]
ACY92813.1 odorant binding protein 8a [Drosophila melanogaster]
ACY92812.1 odorant binding protein 8a [Drosophila melanogaster]
ACY92811.1 odorant binding protein 8a [Drosophila melanogaster]
ACY92810.1 odorant binding protein 8a [Drosophila melanogaster]
ACY92809.1 odorant binding protein 8a [Drosophila melanogaster]
ACY92808.1 odorant binding protein 8a [Drosophila melanogaster]
ACY92807.1 odorant binding protein 8a [Drosophila melanogaster]
ACY92806.1 odorant binding protein 8a [Drosophila melanogaster]
ACY92805.1 odorant binding protein 8a [Drosophila melanogaster]
ACY92804.1 odorant binding protein 8a [Drosophila melanogaster]
ACY92803.1 odorant binding protein 8a [Drosophila melanogaster]
ACY92802.1 odorant binding protein 8a [Drosophila melanogaster]
ACY92801.1 odorant binding protein 8a [Drosophila melanogaster]
ACY92800.1 odorant binding protein 8a [Drosophila melanogaster]
ACY92799.1 odorant binding protein 8a [Drosophila melanogaster]
ACY92798.1 odorant binding protein 8a [Drosophila melanogaster]
ACY92797.1 odorant binding protein 8a [Drosophila melanogaster]
ACY92796.1 odorant binding protein 8a [Drosophila melanogaster]
ACY92795.1 odorant binding protein 8a [Drosophila melanogaster]
ACY92794.1 odorant binding protein 8a [Drosophila melanogaster]
ACY92793.1 odorant binding protein 8a [Drosophila melanogaster]
ACY92792.1 odorant binding protein 8a [Drosophila melanogaster]
ACY92791.1 odorant binding protein 8a [Drosophila melanogaster]
ACY92790.1 odorant binding protein 8a [Drosophila melanogaster]
ACY92789.1 odorant binding protein 8a [Drosophila melanogaster]
ACY92788.1 odorant binding protein 8a [Drosophila melanogaster]
ACY92787.1 odorant binding protein 8a [Drosophila melanogaster]
ACY92786.1 odorant binding protein 8a [Drosophila melanogaster]
ACY92785.1 odorant binding protein 8a [Drosophila melanogaster]
ACY92784.1 odorant binding protein 8a [Drosophila melanogaster]
ACY92783.1 odorant binding protein 8a [Drosophila melanogaster]
ACY92782.1 odorant binding protein 8a [Drosophila melanogaster]
ACY92781.1 odorant binding protein 8a [Drosophila melanogaster]
ACY92780.1 odorant binding protein 8a [Drosophila melanogaster]
ACY92779.1 odorant binding protein 8a [Drosophila melanogaster]
ACY92778.1 odorant binding protein 8a [Drosophila melanogaster]
ACY92777.1 odorant binding protein 8a [Drosophila melanogaster]
ACY92776.1 odorant binding protein 8a [Drosophila melanogaster]
ACY92775.1 odorant binding protein 8a [Drosophila melanogaster]
ACY92774.1 odorant binding protein 8a [Drosophila melanogaster]
ACY92773.1 odorant binding protein 8a [Drosophila melanogaster]
ACY92772.1 odorant binding protein 8a [Drosophila melanogaster]
ACY92771.1 odorant binding protein 8a [Drosophila melanogaster]
ACY92770.1 odorant binding protein 8a [Drosophila melanogaster]
ACY92769.1 odorant binding protein 8a [Drosophila melanogaster]
ACY92768.1 odorant binding protein 8a [Drosophila melanogaster]
ACY92767.1 odorant binding protein 8a [Drosophila melanogaster]
ACY92766.1 odorant binding protein 8a [Drosophila melanogaster]
ACY92765.1 odorant binding protein 8a [Drosophila melanogaster]
ACY92764.1 odorant binding protein 8a [Drosophila melanogaster]
ACY92763.1 odorant binding protein 8a [Drosophila melanogaster]
ACY92762.1 odorant binding protein 8a [Drosophila melanogaster]
ACY92761.1 odorant binding protein 8a [Drosophila melanogaster]
ACY92760.1 odorant binding protein 8a [Drosophila melanogaster]
ACY92759.1 odorant binding protein 8a [Drosophila melanogaster]
ACY92758.1 odorant binding protein 8a [Drosophila melanogaster]
ACY92757.1 odorant binding protein 8a [Drosophila melanogaster]
ACY92756.1 odorant binding protein 8a [Drosophila melanogaster]
ACY92755.1 odorant binding protein 8a [Drosophila melanogaster]
ACY92754.1 odorant binding protein 8a [Drosophila melanogaster]
ACY92753.1 odorant binding protein 8a [Drosophila melanogaster]
ACY92752.1 odorant binding protein 8a [Drosophila melanogaster]
ACY92751.1 odorant binding protein 8a [Drosophila melanogaster]
ACY92750.1 odorant binding protein 8a [Drosophila melanogaster]
ACY92749.1 odorant binding protein 8a [Drosophila melanogaster]
ACY92748.1 odorant binding protein 8a [Drosophila melanogaster]
ACY92747.1 odorant binding protein 8a [Drosophila melanogaster]
ACY92746.1 odorant binding protein 8a [Drosophila melanogaster]
ACY92745.1 odorant binding protein 8a [Drosophila melanogaster]
ACY92744.1 odorant binding protein 8a [Drosophila melanogaster]
ACY92743.1 odorant binding protein 8a [Drosophila melanogaster]
ACY92742.1 odorant binding protein 8a [Drosophila melanogaster]
ACY92741.1 odorant binding protein 8a [Drosophila melanogaster]
ACY92740.1 odorant binding protein 8a [Drosophila melanogaster]
ACY92739.1 odorant binding protein 8a [Drosophila melanogaster]
ACY92738.1 odorant binding protein 8a [Drosophila melanogaster]
ACY92737.1 odorant binding protein 8a [Drosophila melanogaster]
ACY92736.1 odorant binding protein 8a [Drosophila melanogaster]
ACY92735.1 odorant binding protein 8a [Drosophila melanogaster]
ACY92734.1 odorant binding protein 8a [Drosophila melanogaster]
ACY92733.1 odorant binding protein 8a [Drosophila melanogaster]
ACY92732.1 odorant binding protein 8a [Drosophila melanogaster]
ACY92731.1 odorant binding protein 8a [Drosophila melanogaster]
ACY92730.1 odorant binding protein 8a [Drosophila melanogaster]
ACY92729.1 odorant binding protein 8a [Drosophila melanogaster]
ACY92728.1 odorant binding protein 8a [Drosophila melanogaster]
ACY92727.1 odorant binding protein 8a [Drosophila melanogaster]
ACY92726.1 odorant binding protein 8a [Drosophila melanogaster]
ACY92725.1 odorant binding protein 8a [Drosophila melanogaster]
ACY92724.1 odorant binding protein 8a [Drosophila melanogaster]
ACY92723.1 odorant binding protein 8a [Drosophila melanogaster]
ACY92722.1 odorant binding protein 8a [Drosophila melanogaster]
ACY92721.1 odorant binding protein 8a [Drosophila melanogaster]
ACY92720.1 odorant binding protein 8a [Drosophila melanogaster]
ACY92719.1 odorant binding protein 8a [Drosophila melanogaster]
ACY92718.1 odorant binding protein 8a [Drosophila melanogaster]
ACY92717.1 odorant binding protein 8a [Drosophila melanogaster]
ACY92716.1 odorant binding protein 8a [Drosophila melanogaster]
ACY92715.1 odorant binding protein 8a [Drosophila melanogaster]
ACY92714.1 odorant binding protein 8a [Drosophila melanogaster]
ACY92713.1 odorant binding protein 8a [Drosophila melanogaster]
ACY92712.1 odorant binding protein 8a [Drosophila melanogaster]
ACY92711.1 odorant binding protein 8a [Drosophila melanogaster]
ACY92710.1 odorant binding protein 8a [Drosophila melanogaster]
ACY92709.1 odorant binding protein 8a [Drosophila melanogaster]
ACY92708.1 odorant binding protein 8a [Drosophila melanogaster]
ACY92707.1 odorant binding protein 8a [Drosophila melanogaster]
ACY92706.1 odorant binding protein 8a [Drosophila melanogaster]
ACY92705.1 odorant binding protein 8a [Drosophila melanogaster]
ACY92704.1 odorant binding protein 8a [Drosophila melanogaster]
ACY92703.1 odorant binding protein 8a [Drosophila melanogaster]
ACY92702.1 odorant binding protein 8a [Drosophila melanogaster]
ACT22489.1 odorant-binding protein 99d [Drosophila melanogaster]
ACT22488.1 odorant-binding protein 99d [Drosophila melanogaster]
ACT22487.1 odorant-binding protein 99d [Drosophila melanogaster]
ACT22486.1 odorant-binding protein 99d [Drosophila melanogaster]
ACT22485.1 odorant-binding protein 99d [Drosophila melanogaster]
ACT22484.1 odorant-binding protein 99d [Drosophila melanogaster]
ACT22483.1 odorant-binding protein 99d [Drosophila melanogaster]
ACT22482.1 odorant-binding protein 99d [Drosophila melanogaster]
ACT22481.1 odorant-binding protein 99d [Drosophila melanogaster]
ACT22480.1 odorant-binding protein 99d [Drosophila melanogaster]
ACT22479.1 odorant-binding protein 99d [Drosophila melanogaster]
ACT22478.1 odorant-binding protein 99d [Drosophila melanogaster]
ACT22477.1 odorant-binding protein 99d [Drosophila melanogaster]
ACT22476.1 odorant-binding protein 99d [Drosophila melanogaster]
ACT22475.1 odorant-binding protein 99d [Drosophila melanogaster]
ACT22474.1 odorant-binding protein 99d [Drosophila melanogaster]
ACT22473.1 odorant-binding protein 99d [Drosophila melanogaster]
ACT22472.1 odorant-binding protein 99d [Drosophila melanogaster]
ACT22471.1 odorant-binding protein 99d [Drosophila melanogaster]
ACT22470.1 odorant-binding protein 99d [Drosophila melanogaster]
ACT22469.1 odorant-binding protein 99d [Drosophila melanogaster]
ACT22468.1 odorant-binding protein 99d [Drosophila melanogaster]
ACT22467.1 odorant-binding protein 99d [Drosophila melanogaster]
ACT22466.1 odorant-binding protein 99d [Drosophila melanogaster]
ACT22465.1 odorant-binding protein 99d [Drosophila melanogaster]
ACT22464.1 odorant-binding protein 99d [Drosophila melanogaster]
ACT22463.1 odorant-binding protein 99d [Drosophila melanogaster]
ACT22462.1 odorant-binding protein 99d [Drosophila melanogaster]
ACT22461.1 odorant-binding protein 99d [Drosophila melanogaster]
ACT22460.1 odorant-binding protein 99d [Drosophila melanogaster]
ACT22459.1 odorant-binding protein 99d [Drosophila melanogaster]
ACT22458.1 odorant-binding protein 99d [Drosophila melanogaster]
ACT22457.1 odorant-binding protein 99d [Drosophila melanogaster]
ACT22456.1 odorant-binding protein 99d [Drosophila melanogaster]
ACT22455.1 odorant-binding protein 99d [Drosophila melanogaster]
ACT22454.1 odorant-binding protein 99d [Drosophila melanogaster]
ACT22453.1 odorant-binding protein 99d [Drosophila melanogaster]
ACT22452.1 odorant-binding protein 99d [Drosophila melanogaster]
ACT22451.1 odorant-binding protein 99d [Drosophila melanogaster]
ACT22450.1 odorant-binding protein 99d [Drosophila melanogaster]
ACT22449.1 odorant-binding protein 99d [Drosophila melanogaster]
ACT22448.1 odorant-binding protein 99d [Drosophila melanogaster]
ACT22447.1 odorant-binding protein 99d [Drosophila melanogaster]
ACT22446.1 odorant-binding protein 99d [Drosophila melanogaster]
ACT22445.1 odorant-binding protein 99d [Drosophila melanogaster]
ACT22444.1 odorant-binding protein 99d [Drosophila melanogaster]
ACT22443.1 odorant-binding protein 99d [Drosophila melanogaster]
ACT22442.1 odorant-binding protein 99d [Drosophila melanogaster]
ACT22441.1 odorant-binding protein 99d [Drosophila melanogaster]
ACT22440.1 odorant-binding protein 99d [Drosophila melanogaster]
ACT22439.1 odorant-binding protein 99d [Drosophila melanogaster]
ACT22438.1 odorant-binding protein 99d [Drosophila melanogaster]
ACT22437.1 odorant-binding protein 99d [Drosophila melanogaster]
ACT22436.1 odorant-binding protein 99d [Drosophila melanogaster]
ACT22435.1 odorant-binding protein 99d [Drosophila melanogaster]
ACT22434.1 odorant-binding protein 99d [Drosophila melanogaster]
ACT22433.1 odorant-binding protein 99d [Drosophila melanogaster]
ACT22432.1 odorant-binding protein 99d [Drosophila melanogaster]
ACT22431.1 odorant-binding protein 99d [Drosophila melanogaster]
ACT22430.1 odorant-binding protein 99d [Drosophila melanogaster]
ACT22429.1 odorant-binding protein 99d [Drosophila melanogaster]
ACT22428.1 odorant-binding protein 99d [Drosophila melanogaster]
ACT22427.1 odorant-binding protein 99d [Drosophila melanogaster]
ACT22426.1 odorant-binding protein 99d [Drosophila melanogaster]
ACT22425.1 odorant-binding protein 99d [Drosophila melanogaster]
ACT22424.1 odorant-binding protein 99d [Drosophila melanogaster]
ACT22423.1 odorant-binding protein 99d [Drosophila melanogaster]
ACT22422.1 odorant-binding protein 99d [Drosophila melanogaster]
ACT22421.1 odorant-binding protein 99d [Drosophila melanogaster]
ACT22420.1 odorant-binding protein 99d [Drosophila melanogaster]
ACT22419.1 odorant-binding protein 99d [Drosophila melanogaster]
ACT22418.1 odorant-binding protein 99d [Drosophila melanogaster]
ACT22417.1 odorant-binding protein 99d [Drosophila melanogaster]
ACT22416.1 odorant-binding protein 99d [Drosophila melanogaster]
ACT22415.1 odorant-binding protein 99d [Drosophila melanogaster]
ACT22414.1 odorant-binding protein 99d [Drosophila melanogaster]
ACT22413.1 odorant-binding protein 99d [Drosophila melanogaster]
ACT22412.1 odorant-binding protein 99d [Drosophila melanogaster]
ACT22411.1 odorant-binding protein 99d [Drosophila melanogaster]
ACT22410.1 odorant-binding protein 99d [Drosophila melanogaster]
ACT22409.1 odorant-binding protein 99d [Drosophila melanogaster]
ACT22408.1 odorant-binding protein 99d [Drosophila melanogaster]
ACT22407.1 odorant-binding protein 99d [Drosophila melanogaster]
ACT22406.1 odorant-binding protein 99d [Drosophila melanogaster]
ACT22405.1 odorant-binding protein 99d [Drosophila melanogaster]
ACT22404.1 odorant-binding protein 99d [Drosophila melanogaster]
ACT22403.1 odorant-binding protein 99d [Drosophila melanogaster]
ACT22402.1 odorant-binding protein 99d [Drosophila melanogaster]
ACT22401.1 odorant-binding protein 99d [Drosophila melanogaster]
ACT22400.1 odorant-binding protein 99d [Drosophila melanogaster]
ACT22399.1 odorant-binding protein 99d [Drosophila melanogaster]
ACT22398.1 odorant-binding protein 99d [Drosophila melanogaster]
ACT22397.1 odorant-binding protein 99d [Drosophila melanogaster]
ACT22396.1 odorant-binding protein 99d [Drosophila melanogaster]
ACT22395.1 odorant-binding protein 99d [Drosophila melanogaster]
ACT22394.1 odorant-binding protein 99d [Drosophila melanogaster]
ACT22393.1 odorant-binding protein 99d [Drosophila melanogaster]
ACT22392.1 odorant-binding protein 99d [Drosophila melanogaster]
ACT22391.1 odorant-binding protein 99d [Drosophila melanogaster]
ACT22390.1 odorant-binding protein 99d [Drosophila melanogaster]
ACT22389.1 odorant-binding protein 99d [Drosophila melanogaster]
ACT22388.1 odorant-binding protein 99d [Drosophila melanogaster]
ACT22387.1 odorant-binding protein 99d [Drosophila melanogaster]
ACT22386.1 odorant-binding protein 99d [Drosophila melanogaster]
ACT22385.1 odorant-binding protein 99d [Drosophila melanogaster]
ACT22384.1 odorant-binding protein 99d [Drosophila melanogaster]
ACT22383.1 odorant-binding protein 99d [Drosophila melanogaster]
ACT22382.1 odorant-binding protein 99d [Drosophila melanogaster]
ACT22381.1 odorant-binding protein 99d [Drosophila melanogaster]
ACT22380.1 odorant-binding protein 99d [Drosophila melanogaster]
ACT22379.1 odorant-binding protein 99d [Drosophila melanogaster]
ACT22378.1 odorant-binding protein 99d [Drosophila melanogaster]
ACT22377.1 odorant-binding protein 99c [Drosophila melanogaster]
ACT22376.1 odorant-binding protein 99c [Drosophila melanogaster]
ACT22375.1 odorant-binding protein 99c [Drosophila melanogaster]
ACT22374.1 odorant-binding protein 99c [Drosophila melanogaster]
ACT22373.1 odorant-binding protein 99c [Drosophila melanogaster]
ACT22372.1 odorant-binding protein 99c [Drosophila melanogaster]
ACT22371.1 odorant-binding protein 99c [Drosophila melanogaster]
ACT22370.1 odorant-binding protein 99c [Drosophila melanogaster]
ACT22369.1 odorant-binding protein 99c [Drosophila melanogaster]
ACT22368.1 odorant-binding protein 99c [Drosophila melanogaster]
ACT22367.1 odorant-binding protein 99c [Drosophila melanogaster]
ACT22366.1 odorant-binding protein 99c [Drosophila melanogaster]
ACT22365.1 odorant-binding protein 99c [Drosophila melanogaster]
ACT22364.1 odorant-binding protein 99c [Drosophila melanogaster]
ACT22363.1 odorant-binding protein 99c [Drosophila melanogaster]
ACT22362.1 odorant-binding protein 99c [Drosophila melanogaster]
ACT22361.1 odorant-binding protein 99c [Drosophila melanogaster]
ACT22360.1 odorant-binding protein 99c [Drosophila melanogaster]
ACT22359.1 odorant-binding protein 99c [Drosophila melanogaster]
ACT22358.1 odorant-binding protein 99c [Drosophila melanogaster]
ACT22357.1 odorant-binding protein 99c [Drosophila melanogaster]
ACT22356.1 odorant-binding protein 99c [Drosophila melanogaster]
ACT22355.1 odorant-binding protein 99c [Drosophila melanogaster]
ACT22354.1 odorant-binding protein 99c [Drosophila melanogaster]
ACT22353.1 odorant-binding protein 99c [Drosophila melanogaster]
ACT22352.1 odorant-binding protein 99c [Drosophila melanogaster]
ACT22351.1 odorant-binding protein 99c [Drosophila melanogaster]
ACT22350.1 odorant-binding protein 99c [Drosophila melanogaster]
ACT22349.1 odorant-binding protein 99c [Drosophila melanogaster]
ACT22348.1 odorant-binding protein 99c [Drosophila melanogaster]
ACT22347.1 odorant-binding protein 99c [Drosophila melanogaster]
ACT22346.1 odorant-binding protein 99c [Drosophila melanogaster]
ACT22345.1 odorant-binding protein 99c [Drosophila melanogaster]
ACT22344.1 odorant-binding protein 99c [Drosophila melanogaster]
ACT22343.1 odorant-binding protein 99c [Drosophila melanogaster]
ACT22342.1 odorant-binding protein 99c [Drosophila melanogaster]
ACT22341.1 odorant-binding protein 99c [Drosophila melanogaster]
ACT22340.1 odorant-binding protein 99c [Drosophila melanogaster]
ACT22339.1 odorant-binding protein 99c [Drosophila melanogaster]
ACT22338.1 odorant-binding protein 99c [Drosophila melanogaster]
ACT22337.1 odorant-binding protein 99c [Drosophila melanogaster]
ACT22336.1 odorant-binding protein 99c [Drosophila melanogaster]
ACT22335.1 odorant-binding protein 99c [Drosophila melanogaster]
ACT22334.1 odorant-binding protein 99c [Drosophila melanogaster]
ACT22333.1 odorant-binding protein 99c [Drosophila melanogaster]
ACT22332.1 odorant-binding protein 99c [Drosophila melanogaster]
ACT22331.1 odorant-binding protein 99c [Drosophila melanogaster]
ACT22330.1 odorant-binding protein 99c [Drosophila melanogaster]
ACT22329.1 odorant-binding protein 99c [Drosophila melanogaster]
ACT22328.1 odorant-binding protein 99c [Drosophila melanogaster]
ACT22327.1 odorant-binding protein 99c [Drosophila melanogaster]
ACT22326.1 odorant-binding protein 99c [Drosophila melanogaster]
ACT22325.1 odorant-binding protein 99c [Drosophila melanogaster]
ACT22324.1 odorant-binding protein 99c [Drosophila melanogaster]
ACT22323.1 odorant-binding protein 99c [Drosophila melanogaster]
ACT22322.1 odorant-binding protein 99c [Drosophila melanogaster]
ACT22321.1 odorant-binding protein 99c [Drosophila melanogaster]
ACT22320.1 odorant-binding protein 99c [Drosophila melanogaster]
ACT22319.1 odorant-binding protein 99c [Drosophila melanogaster]
ACT22318.1 odorant-binding protein 99c [Drosophila melanogaster]
ACT22317.1 odorant-binding protein 99c [Drosophila melanogaster]
ACT22316.1 odorant-binding protein 99c [Drosophila melanogaster]
ACT22315.1 odorant-binding protein 99c [Drosophila melanogaster]
ACT22314.1 odorant-binding protein 99c [Drosophila melanogaster]
ACT22313.1 odorant-binding protein 99c [Drosophila melanogaster]
ACT22312.1 odorant-binding protein 99c [Drosophila melanogaster]
ACT22311.1 odorant-binding protein 99c [Drosophila melanogaster]
ACT22310.1 odorant-binding protein 99c [Drosophila melanogaster]
ACT22309.1 odorant-binding protein 99c [Drosophila melanogaster]
ACT22308.1 odorant-binding protein 99c [Drosophila melanogaster]
ACT22307.1 odorant-binding protein 99c [Drosophila melanogaster]
ACT22306.1 odorant-binding protein 99c [Drosophila melanogaster]
ACT22305.1 odorant-binding protein 99c [Drosophila melanogaster]
ACT22304.1 odorant-binding protein 99c [Drosophila melanogaster]
ACT22303.1 odorant-binding protein 99c [Drosophila melanogaster]
ACT22302.1 odorant-binding protein 99c [Drosophila melanogaster]
ACT22301.1 odorant-binding protein 99c [Drosophila melanogaster]
ACT22300.1 odorant-binding protein 99c [Drosophila melanogaster]
ACT22299.1 odorant-binding protein 99c [Drosophila melanogaster]
ACT22298.1 odorant-binding protein 99c [Drosophila melanogaster]
ACT22297.1 odorant-binding protein 99c [Drosophila melanogaster]
ACT22296.1 odorant-binding protein 99c [Drosophila melanogaster]
ACT22295.1 odorant-binding protein 99c [Drosophila melanogaster]
ACT22294.1 odorant-binding protein 99c [Drosophila melanogaster]
ACT22293.1 odorant-binding protein 99c [Drosophila melanogaster]
ACT22292.1 odorant-binding protein 99c [Drosophila melanogaster]
ACT22291.1 odorant-binding protein 99c [Drosophila melanogaster]
ACT22290.1 odorant-binding protein 99c [Drosophila melanogaster]
ACT22289.1 odorant-binding protein 99c [Drosophila melanogaster]
ACT22288.1 odorant-binding protein 99c [Drosophila melanogaster]
ACT22287.1 odorant-binding protein 99c [Drosophila melanogaster]
ACT22286.1 odorant-binding protein 99c [Drosophila melanogaster]
ACT22285.1 odorant-binding protein 99c [Drosophila melanogaster]
ACT22284.1 odorant-binding protein 99c [Drosophila melanogaster]
ACT22283.1 odorant-binding protein 99c [Drosophila melanogaster]
ACT22282.1 odorant-binding protein 99c [Drosophila melanogaster]
ACT22281.1 odorant-binding protein 99c [Drosophila melanogaster]
ACT22280.1 odorant-binding protein 99c [Drosophila melanogaster]
ACT22279.1 odorant-binding protein 99c [Drosophila melanogaster]
ACT22278.1 odorant-binding protein 99c [Drosophila melanogaster]
ACT22277.1 odorant-binding protein 99c [Drosophila melanogaster]
ACT22276.1 odorant-binding protein 99b [Drosophila melanogaster]
ACT22275.1 odorant-binding protein 99b [Drosophila melanogaster]
ACT22274.1 odorant-binding protein 99b [Drosophila melanogaster]
ACT22273.1 odorant-binding protein 99b [Drosophila melanogaster]
ACT22272.1 odorant-binding protein 99b [Drosophila melanogaster]
ACT22271.1 odorant-binding protein 99b [Drosophila melanogaster]
ACT22270.1 odorant-binding protein 99b [Drosophila melanogaster]
ACT22269.1 odorant-binding protein 99b [Drosophila melanogaster]
ACT22268.1 odorant-binding protein 99b [Drosophila melanogaster]
ACT22267.1 odorant-binding protein 99b [Drosophila melanogaster]
ACT22266.1 odorant-binding protein 99b [Drosophila melanogaster]
ACT22265.1 odorant-binding protein 99b [Drosophila melanogaster]
ACT22264.1 odorant-binding protein 99b [Drosophila melanogaster]
ACT22263.1 odorant-binding protein 99b [Drosophila melanogaster]
ACT22262.1 odorant-binding protein 99b [Drosophila melanogaster]
ACT22261.1 odorant-binding protein 99b [Drosophila melanogaster]
ACT22260.1 odorant-binding protein 99b [Drosophila melanogaster]
ACT22259.1 odorant-binding protein 99b [Drosophila melanogaster]
ACT22258.1 odorant-binding protein 99b [Drosophila melanogaster]
ACT22257.1 odorant-binding protein 99b [Drosophila melanogaster]
ACT22256.1 odorant-binding protein 99b [Drosophila melanogaster]
ACT22255.1 odorant-binding protein 99b [Drosophila melanogaster]
ACT22254.1 odorant-binding protein 99b [Drosophila melanogaster]
ACT22253.1 odorant-binding protein 99b [Drosophila melanogaster]
ACT22252.1 odorant-binding protein 99b [Drosophila melanogaster]
ACT22251.1 odorant-binding protein 99b [Drosophila melanogaster]
ACT22250.1 odorant-binding protein 99b [Drosophila melanogaster]
ACT22249.1 odorant-binding protein 99b [Drosophila melanogaster]
ACT22248.1 odorant-binding protein 99b [Drosophila melanogaster]
ACT22247.1 odorant-binding protein 99b [Drosophila melanogaster]
ACT22246.1 odorant-binding protein 99b [Drosophila melanogaster]
ACT22245.1 odorant-binding protein 99b [Drosophila melanogaster]
ACT22244.1 odorant-binding protein 99b [Drosophila melanogaster]
ACT22243.1 odorant-binding protein 99b [Drosophila melanogaster]
ACT22242.1 odorant-binding protein 99b [Drosophila melanogaster]
ACT22241.1 odorant-binding protein 99b [Drosophila melanogaster]
ACT22240.1 odorant-binding protein 99b [Drosophila melanogaster]
ACT22239.1 odorant-binding protein 99b [Drosophila melanogaster]
ACT22238.1 odorant-binding protein 99b [Drosophila melanogaster]
ACT22237.1 odorant-binding protein 99b [Drosophila melanogaster]
ACT22236.1 odorant-binding protein 99b [Drosophila melanogaster]
ACT22235.1 odorant-binding protein 99b [Drosophila melanogaster]
ACT22234.1 odorant-binding protein 99b [Drosophila melanogaster]
ACT22233.1 odorant-binding protein 99b [Drosophila melanogaster]
ACT22232.1 odorant-binding protein 99b [Drosophila melanogaster]
ACT22231.1 odorant-binding protein 99b [Drosophila melanogaster]
ACT22230.1 odorant-binding protein 99b [Drosophila melanogaster]
ACT22229.1 odorant-binding protein 99b [Drosophila melanogaster]
ACT22228.1 odorant-binding protein 99b [Drosophila melanogaster]
ACT22227.1 odorant-binding protein 99b [Drosophila melanogaster]
ACT22226.1 odorant-binding protein 99b [Drosophila melanogaster]
ACT22225.1 odorant-binding protein 99b [Drosophila melanogaster]
ACT22224.1 odorant-binding protein 99b [Drosophila melanogaster]
ACT22223.1 odorant-binding protein 99b [Drosophila melanogaster]
ACT22222.1 odorant-binding protein 99b [Drosophila melanogaster]
ACT22221.1 odorant-binding protein 99b [Drosophila melanogaster]
ACT22220.1 odorant-binding protein 99b [Drosophila melanogaster]
ACT22219.1 odorant-binding protein 99b [Drosophila melanogaster]
ACT22218.1 odorant-binding protein 99b [Drosophila melanogaster]
ACT22217.1 odorant-binding protein 99b [Drosophila melanogaster]
ACT22216.1 odorant-binding protein 99b [Drosophila melanogaster]
ACT22215.1 odorant-binding protein 99b [Drosophila melanogaster]
ACT22214.1 odorant-binding protein 99b [Drosophila melanogaster]
ACT22213.1 odorant-binding protein 99b [Drosophila melanogaster]
ACT22212.1 odorant-binding protein 99b [Drosophila melanogaster]
ACT22211.1 odorant-binding protein 99b [Drosophila melanogaster]
ACT22210.1 odorant-binding protein 99b [Drosophila melanogaster]
ACT22209.1 odorant-binding protein 99b [Drosophila melanogaster]
ACT22208.1 odorant-binding protein 99b [Drosophila melanogaster]
ACT22207.1 odorant-binding protein 99b [Drosophila melanogaster]
ACT22206.1 odorant-binding protein 99b [Drosophila melanogaster]
ACT22205.1 odorant-binding protein 99b [Drosophila melanogaster]
ACT22204.1 odorant-binding protein 99b [Drosophila melanogaster]
ACT22203.1 odorant-binding protein 99b [Drosophila melanogaster]
ACT22202.1 odorant-binding protein 99b [Drosophila melanogaster]
ACT22201.1 odorant-binding protein 99b [Drosophila melanogaster]
ACT22200.1 odorant-binding protein 99b [Drosophila melanogaster]
ACT22199.1 odorant-binding protein 99b [Drosophila melanogaster]
ACT22198.1 odorant-binding protein 99b [Drosophila melanogaster]
ACT22197.1 odorant-binding protein 99b [Drosophila melanogaster]
ACT22196.1 odorant-binding protein 99b [Drosophila melanogaster]
ACT22195.1 odorant-binding protein 99b [Drosophila melanogaster]
ACT22194.1 odorant-binding protein 99b [Drosophila melanogaster]
ACT22193.1 odorant-binding protein 99b [Drosophila melanogaster]
ACT22192.1 odorant-binding protein 99b [Drosophila melanogaster]
ACT22191.1 odorant-binding protein 99b [Drosophila melanogaster]
ACT22190.1 odorant-binding protein 99b [Drosophila melanogaster]
ACT22189.1 odorant-binding protein 99b [Drosophila melanogaster]
ACT22188.1 odorant-binding protein 99b [Drosophila melanogaster]
ACT22187.1 odorant-binding protein 99b [Drosophila melanogaster]
ACT22186.1 odorant-binding protein 99b [Drosophila melanogaster]
ACT22185.1 odorant-binding protein 99b [Drosophila melanogaster]
ACT22184.1 odorant-binding protein 99b [Drosophila melanogaster]
ACT22183.1 odorant-binding protein 99b [Drosophila melanogaster]
ACT22182.1 odorant-binding protein 99b [Drosophila melanogaster]
ACT22181.1 odorant-binding protein 99b [Drosophila melanogaster]
ACT22180.1 odorant-binding protein 99b [Drosophila melanogaster]
ACT22179.1 odorant-binding protein 99b [Drosophila melanogaster]
ACT22178.1 odorant-binding protein 99b [Drosophila melanogaster]
ACT22177.1 odorant-binding protein 99b [Drosophila melanogaster]
ACT22176.1 odorant-binding protein 99b [Drosophila melanogaster]
ACT22175.1 odorant-binding protein 99b [Drosophila melanogaster]
ACT22174.1 odorant-binding protein 99b [Drosophila melanogaster]
ACT22173.1 odorant-binding protein 99b [Drosophila melanogaster]
ACT22172.1 odorant-binding protein 99b [Drosophila melanogaster]
ACT22171.1 odorant-binding protein 99b [Drosophila melanogaster]
ACT22170.1 odorant-binding protein 99b [Drosophila melanogaster]
ACT22169.1 odorant-binding protein 99b [Drosophila melanogaster]
ACT22168.1 odorant-binding protein 99b [Drosophila melanogaster]
ACT22167.1 odorant-binding protein 99b [Drosophila melanogaster]
ACT22166.1 odorant-binding protein 99b [Drosophila melanogaster]
ACT22165.1 odorant-binding protein 99b [Drosophila melanogaster]
ACT22164.1 odorant-binding protein 99a [Drosophila melanogaster]
ACT22163.1 odorant-binding protein 99a [Drosophila melanogaster]
ACT22162.1 odorant-binding protein 99a [Drosophila melanogaster]
ACT22161.1 odorant-binding protein 99a [Drosophila melanogaster]
ACT22160.1 odorant-binding protein 99a [Drosophila melanogaster]
ACT22159.1 odorant-binding protein 99a [Drosophila melanogaster]
ACT22158.1 odorant-binding protein 99a [Drosophila melanogaster]
ACT22157.1 odorant-binding protein 99a [Drosophila melanogaster]
ACT22156.1 odorant-binding protein 99a [Drosophila melanogaster]
ACT22155.1 odorant-binding protein 99a [Drosophila melanogaster]
ACT22154.1 odorant-binding protein 99a [Drosophila melanogaster]
ACT22153.1 odorant-binding protein 99a [Drosophila melanogaster]
ACT22152.1 odorant-binding protein 99a [Drosophila melanogaster]
ACT22151.1 odorant-binding protein 99a [Drosophila melanogaster]
ACT22150.1 odorant-binding protein 99a [Drosophila melanogaster]
ACT22149.1 odorant-binding protein 99a [Drosophila melanogaster]
ACT22148.1 odorant-binding protein 99a [Drosophila melanogaster]
ACT22147.1 odorant-binding protein 99a [Drosophila melanogaster]
ACT22146.1 odorant-binding protein 99a [Drosophila melanogaster]
ACT22145.1 odorant-binding protein 99a [Drosophila melanogaster]
ACT22144.1 odorant-binding protein 99a [Drosophila melanogaster]
ACT22143.1 odorant-binding protein 99a [Drosophila melanogaster]
ACT22142.1 odorant-binding protein 99a [Drosophila melanogaster]
ACT22141.1 odorant-binding protein 99a [Drosophila melanogaster]
ACT22140.1 odorant-binding protein 99a [Drosophila melanogaster]
ACT22139.1 odorant-binding protein 99a [Drosophila melanogaster]
ACT22138.1 odorant-binding protein 99a [Drosophila melanogaster]
ACT22137.1 odorant-binding protein 99a [Drosophila melanogaster]
ACT22136.1 odorant-binding protein 99a [Drosophila melanogaster]
ACT22135.1 odorant-binding protein 99a [Drosophila melanogaster]
ACT22134.1 odorant-binding protein 99a [Drosophila melanogaster]
ACT22133.1 odorant-binding protein 99a [Drosophila melanogaster]
ACT22132.1 odorant-binding protein 99a [Drosophila melanogaster]
ACT22131.1 odorant-binding protein 99a [Drosophila melanogaster]
ACT22130.1 odorant-binding protein 99a [Drosophila melanogaster]
ACT22129.1 odorant-binding protein 99a [Drosophila melanogaster]
ACT22128.1 odorant-binding protein 99a [Drosophila melanogaster]
ACT22127.1 odorant-binding protein 99a [Drosophila melanogaster]
ACT22126.1 odorant-binding protein 99a [Drosophila melanogaster]
ACT22125.1 odorant-binding protein 99a [Drosophila melanogaster]
ACT22124.1 odorant-binding protein 99a [Drosophila melanogaster]
ACT22123.1 odorant-binding protein 99a [Drosophila melanogaster]
ACT22122.1 odorant-binding protein 99a [Drosophila melanogaster]
ACT22121.1 odorant-binding protein 99a [Drosophila melanogaster]
ACT22120.1 odorant-binding protein 99a [Drosophila melanogaster]
ACT22119.1 odorant-binding protein 99a [Drosophila melanogaster]
ACT22118.1 odorant-binding protein 99a [Drosophila melanogaster]
ACT22117.1 odorant-binding protein 99a [Drosophila melanogaster]
ACT22116.1 odorant-binding protein 99a [Drosophila melanogaster]
ACT22115.1 odorant-binding protein 99a [Drosophila melanogaster]
ACT22114.1 odorant-binding protein 99a [Drosophila melanogaster]
ACT22113.1 odorant-binding protein 99a [Drosophila melanogaster]
ACT22112.1 odorant-binding protein 99a [Drosophila melanogaster]
ACT22111.1 odorant-binding protein 99a [Drosophila melanogaster]
ACT22110.1 odorant-binding protein 99a [Drosophila melanogaster]
ACT22109.1 odorant-binding protein 99a [Drosophila melanogaster]
ACT22108.1 odorant-binding protein 99a [Drosophila melanogaster]
ACT22107.1 odorant-binding protein 99a [Drosophila melanogaster]
ACT22106.1 odorant-binding protein 99a [Drosophila melanogaster]
ACT22105.1 odorant-binding protein 99a [Drosophila melanogaster]
ACT22104.1 odorant-binding protein 99a [Drosophila melanogaster]
ACT22103.1 odorant-binding protein 99a [Drosophila melanogaster]
ACT22102.1 odorant-binding protein 99a [Drosophila melanogaster]
ACT22101.1 odorant-binding protein 99a [Drosophila melanogaster]
ACT22100.1 odorant-binding protein 99a [Drosophila melanogaster]
ACT22099.1 odorant-binding protein 99a [Drosophila melanogaster]
ACT22098.1 odorant-binding protein 99a [Drosophila melanogaster]
ACT22097.1 odorant-binding protein 99a [Drosophila melanogaster]
ACT22096.1 odorant-binding protein 99a [Drosophila melanogaster]
ACT22095.1 odorant-binding protein 99a [Drosophila melanogaster]
ACT22094.1 odorant-binding protein 99a [Drosophila melanogaster]
ACT22093.1 odorant-binding protein 99a [Drosophila melanogaster]
ACT22092.1 odorant-binding protein 99a [Drosophila melanogaster]
ACT22091.1 odorant-binding protein 99a [Drosophila melanogaster]
ACT22090.1 odorant-binding protein 99a [Drosophila melanogaster]
ACT22089.1 odorant-binding protein 99a [Drosophila melanogaster]
ACT22088.1 odorant-binding protein 99a [Drosophila melanogaster]
ACT22087.1 odorant-binding protein 99a [Drosophila melanogaster]
ACT22086.1 odorant-binding protein 99a [Drosophila melanogaster]
ACT22085.1 odorant-binding protein 99a [Drosophila melanogaster]
ACT22084.1 odorant-binding protein 99a [Drosophila melanogaster]
ACT22083.1 odorant-binding protein 99a [Drosophila melanogaster]
ACT22082.1 odorant-binding protein 99a [Drosophila melanogaster]
ACT22081.1 odorant-binding protein 99a [Drosophila melanogaster]
ACT22080.1 odorant-binding protein 99a [Drosophila melanogaster]
ACT22079.1 odorant-binding protein 99a [Drosophila melanogaster]
ACT22078.1 odorant-binding protein 99a [Drosophila melanogaster]
ACT22077.1 odorant-binding protein 99a [Drosophila melanogaster]
ACT22076.1 odorant-binding protein 99a [Drosophila melanogaster]
ACT22075.1 odorant-binding protein 99a [Drosophila melanogaster]
ACT22074.1 odorant-binding protein 99a [Drosophila melanogaster]
ACT22073.1 odorant-binding protein 99a [Drosophila melanogaster]
ACT22072.1 odorant-binding protein 99a [Drosophila melanogaster]
ACT22071.1 odorant-binding protein 99a [Drosophila melanogaster]
ACT22070.1 odorant-binding protein 99a [Drosophila melanogaster]
ACT22069.1 odorant-binding protein 99a [Drosophila melanogaster]
ACT22068.1 odorant-binding protein 99a [Drosophila melanogaster]
ACT22067.1 odorant-binding protein 99a [Drosophila melanogaster]
ACT22066.1 odorant-binding protein 99a [Drosophila melanogaster]
ACT22065.1 odorant-binding protein 99a [Drosophila melanogaster]
ACT22064.1 odorant-binding protein 99a [Drosophila melanogaster]
ACT22063.1 odorant-binding protein 99a [Drosophila melanogaster]
ACT22062.1 odorant-binding protein 99a [Drosophila melanogaster]
ACT22061.1 odorant-binding protein 99a [Drosophila melanogaster]
ACT22060.1 odorant-binding protein 99a [Drosophila melanogaster]
ACT22059.1 odorant-binding protein 99a [Drosophila melanogaster]
ACT22058.1 odorant-binding protein 99a [Drosophila melanogaster]
ACT22057.1 odorant-binding protein 99a [Drosophila melanogaster]
ABW84054.1 odorant-binding protein 56c [Drosophila melanogaster]
ABW84053.1 odorant-binding protein 56c [Drosophila melanogaster]
ABW84052.1 odorant-binding protein 56c [Drosophila melanogaster]
ABW84051.1 odorant-binding protein 56c [Drosophila melanogaster]
ABW84050.1 odorant-binding protein 56c [Drosophila melanogaster]
ABW84049.1 odorant-binding protein 56c [Drosophila melanogaster]
ABW84048.1 odorant-binding protein 56c [Drosophila melanogaster]
ABW84047.1 odorant-binding protein 56c [Drosophila melanogaster]
ABW84046.1 odorant-binding protein 56c [Drosophila melanogaster]
ABW84045.1 odorant-binding protein 56c [Drosophila melanogaster]
ABW84044.1 odorant-binding protein 56c [Drosophila melanogaster]
ABW84043.1 odorant-binding protein 56c [Drosophila melanogaster]
ABW84042.1 odorant-binding protein 56c [Drosophila melanogaster]
ABW84041.1 odorant-binding protein 56c [Drosophila melanogaster]
ABW84040.1 odorant-binding protein 56c [Drosophila melanogaster]
ABW84039.1 odorant-binding protein 56c [Drosophila melanogaster]
ABW84038.1 odorant-binding protein 56c [Drosophila melanogaster]
ABW84037.1 odorant-binding protein 56c [Drosophila melanogaster]
ABW84036.1 odorant-binding protein 56c [Drosophila melanogaster]
ABW84035.1 odorant-binding protein 56c [Drosophila melanogaster]
ABW84034.1 odorant-binding protein 56c [Drosophila melanogaster]
ABW84033.1 odorant-binding protein 56c [Drosophila melanogaster]
ABW84032.1 odorant-binding protein 56c [Drosophila melanogaster]
ABW84031.1 odorant-binding protein 56c [Drosophila melanogaster]
ABW84030.1 odorant-binding protein 56c [Drosophila melanogaster]
ABW84029.1 odorant-binding protein 56c [Drosophila melanogaster]
ABW84028.1 odorant-binding protein 56c [Drosophila melanogaster]
ABW84027.1 odorant-binding protein 56c [Drosophila melanogaster]
ABW84026.1 odorant-binding protein 56c [Drosophila melanogaster]
ABW84025.1 odorant-binding protein 56c [Drosophila melanogaster]
ABW84024.1 odorant-binding protein 56c [Drosophila melanogaster]
ABW84023.1 odorant-binding protein 56c [Drosophila melanogaster]
ABW84022.1 odorant-binding protein 56c [Drosophila melanogaster]
ABW84021.1 odorant-binding protein 56c [Drosophila melanogaster]
ABW84020.1 odorant-binding protein 56c [Drosophila melanogaster]
ABW84019.1 odorant-binding protein 56c [Drosophila melanogaster]
ABW84018.1 odorant-binding protein 56c [Drosophila melanogaster]
ABW84017.1 odorant-binding protein 56c [Drosophila melanogaster]
ABW84016.1 odorant-binding protein 56c [Drosophila melanogaster]
ABW84015.1 odorant-binding protein 56c [Drosophila melanogaster]
ABW84014.1 odorant-binding protein 56c [Drosophila melanogaster]
ABW84013.1 odorant-binding protein 56c [Drosophila melanogaster]
ABW84012.1 odorant-binding protein 56c [Drosophila melanogaster]
ABW84011.1 odorant-binding protein 56c [Drosophila melanogaster]
ABW84010.1 odorant-binding protein 56c [Drosophila melanogaster]
ABW84009.1 odorant-binding protein 56c [Drosophila melanogaster]
ABW84008.1 odorant-binding protein 56c [Drosophila melanogaster]
ABW78933.1 odorant-binding protein 99d [Drosophila melanogaster]
ABW78932.1 odorant-binding protein 99d [Drosophila melanogaster]
ABW78931.1 odorant-binding protein 99d [Drosophila melanogaster]
ABW78930.1 odorant-binding protein 99d [Drosophila melanogaster]
ABW78929.1 odorant-binding protein 99d [Drosophila melanogaster]
ABW78928.1 odorant-binding protein 99d [Drosophila melanogaster]
ABW78927.1 odorant-binding protein 99d [Drosophila melanogaster]
ABW78926.1 odorant-binding protein 99d [Drosophila melanogaster]
ABW78925.1 odorant-binding protein 99d [Drosophila melanogaster]
ABW78924.1 odorant-binding protein 99d [Drosophila melanogaster]
ABW78923.1 odorant-binding protein 99d [Drosophila melanogaster]
ABW78922.1 odorant-binding protein 99d [Drosophila melanogaster]
ABW78921.1 odorant-binding protein 99d [Drosophila melanogaster]
ABW78920.1 odorant-binding protein 99d [Drosophila melanogaster]
ABW78919.1 odorant-binding protein 99d [Drosophila melanogaster]
ABW78918.1 odorant-binding protein 99d [Drosophila melanogaster]
ABW78917.1 odorant-binding protein 99d [Drosophila melanogaster]
ABW78916.1 odorant-binding protein 99d [Drosophila melanogaster]
ABW78915.1 odorant-binding protein 99d [Drosophila melanogaster]
ABW78914.1 odorant-binding protein 99d [Drosophila melanogaster]
ABW78913.1 odorant-binding protein 99d [Drosophila melanogaster]
ABW78912.1 odorant-binding protein 99d [Drosophila melanogaster]
ABW78911.1 odorant-binding protein 99d [Drosophila melanogaster]
ABW78910.1 odorant-binding protein 99d [Drosophila melanogaster]
ABW78909.1 odorant-binding protein 99d [Drosophila melanogaster]
ABW78908.1 odorant-binding protein 99d [Drosophila melanogaster]
ABW78907.1 odorant-binding protein 99d [Drosophila melanogaster]
ABW78906.1 odorant-binding protein 99d [Drosophila melanogaster]
ABW78905.1 odorant-binding protein 99d [Drosophila melanogaster]
ABW78904.1 odorant-binding protein 99d [Drosophila melanogaster]
ABW78903.1 odorant-binding protein 99d [Drosophila melanogaster]
ABW78902.1 odorant-binding protein 99d [Drosophila melanogaster]
ABW78901.1 odorant-binding protein 99d [Drosophila melanogaster]
ABW78900.1 odorant-binding protein 99d [Drosophila melanogaster]
ABW78899.1 odorant-binding protein 99d [Drosophila melanogaster]
ABW78898.1 odorant-binding protein 99d [Drosophila melanogaster]
ABW78897.1 odorant-binding protein 99d [Drosophila melanogaster]
ABW78896.1 odorant-binding protein 99d [Drosophila melanogaster]
ABW78895.1 odorant-binding protein 99d [Drosophila melanogaster]
ABW78894.1 odorant-binding protein 99d [Drosophila melanogaster]
ABW78893.1 odorant-binding protein 99d [Drosophila melanogaster]
ABW78892.1 odorant-binding protein 99d [Drosophila melanogaster]
ABW78891.1 odorant-binding protein 99d [Drosophila melanogaster]
ABW78890.1 odorant-binding protein 99d [Drosophila melanogaster]
ABW78889.1 odorant-binding protein 99d [Drosophila melanogaster]
ABW78888.1 odorant-binding protein 99d [Drosophila melanogaster]
ABW78887.1 odorant-binding protein 99d [Drosophila melanogaster]
ABW78886.1 odorant-binding protein 99d [Drosophila melanogaster]
ABW78885.1 odorant-binding protein 99d [Drosophila melanogaster]
ABW78884.1 odorant-binding protein 99d [Drosophila melanogaster]
ABW78883.1 odorant-binding protein 99d [Drosophila melanogaster]
ABW78882.1 odorant-binding protein 99d [Drosophila melanogaster]
ABW78881.1 odorant-binding protein 99d [Drosophila melanogaster]
ABW78880.1 odorant-binding protein 99d [Drosophila melanogaster]
ABW78879.1 odorant-binding protein 99d [Drosophila melanogaster]
ABW78878.1 odorant-binding protein 99d [Drosophila melanogaster]
ABW78877.1 odorant-binding protein 99d [Drosophila melanogaster]
ABW78876.1 odorant-binding protein 99d [Drosophila melanogaster]
ABW78875.1 odorant-binding protein 99d [Drosophila melanogaster]
ABW78874.1 odorant-binding protein 99d [Drosophila melanogaster]
ABW78873.1 odorant-binding protein 99d [Drosophila melanogaster]
ABW78872.1 odorant-binding protein 99d [Drosophila melanogaster]
ABW78871.1 odorant-binding protein 99d [Drosophila melanogaster]
ABW78870.1 odorant-binding protein 99d [Drosophila melanogaster]
ABW78869.1 odorant-binding protein 99d [Drosophila melanogaster]
ABW78868.1 odorant-binding protein 99d [Drosophila melanogaster]
ABW78867.1 odorant-binding protein 99d [Drosophila melanogaster]
ABW78866.1 odorant-binding protein 99d [Drosophila melanogaster]
ABW78865.1 odorant-binding protein 99d [Drosophila melanogaster]
ABW78864.1 odorant-binding protein 99d [Drosophila melanogaster]
ABW78863.1 odorant-binding protein 99d [Drosophila melanogaster]
ABW78862.1 odorant-binding protein 99d [Drosophila melanogaster]
ABW78861.1 odorant-binding protein 99d [Drosophila melanogaster]
ABW78860.1 odorant-binding protein 99d [Drosophila melanogaster]
ABW78859.1 odorant-binding protein 99d [Drosophila melanogaster]
ABW78858.1 odorant-binding protein 99d [Drosophila melanogaster]
ABW78857.1 odorant-binding protein 99d [Drosophila melanogaster]
ABW78856.1 odorant-binding protein 99d [Drosophila melanogaster]
ABW78855.1 odorant-binding protein 99d [Drosophila melanogaster]
ABW78854.1 odorant-binding protein 99d [Drosophila melanogaster]
ABW78853.1 odorant-binding protein 99d [Drosophila melanogaster]
ABW78852.1 odorant-binding protein 99d [Drosophila melanogaster]
ABW78851.1 odorant-binding protein 99d [Drosophila melanogaster]
ABW78850.1 odorant-binding protein 99d [Drosophila melanogaster]
ABW78849.1 odorant-binding protein 99d [Drosophila melanogaster]
ABW78848.1 odorant-binding protein 99d [Drosophila melanogaster]
ABW78847.1 odorant-binding protein 99d [Drosophila melanogaster]
ABW78846.1 odorant-binding protein 99d [Drosophila melanogaster]
ABW78845.1 odorant-binding protein 99d [Drosophila melanogaster]
ABW78844.1 odorant-binding protein 99d [Drosophila melanogaster]
ABW78843.1 odorant-binding protein 99d [Drosophila melanogaster]
ABW78842.1 odorant-binding protein 99d [Drosophila melanogaster]
ABW78841.1 odorant-binding protein 99d [Drosophila melanogaster]
ABW78840.1 odorant-binding protein 99d [Drosophila melanogaster]
ABW78839.1 odorant-binding protein 99d [Drosophila melanogaster]
ABW78838.1 odorant-binding protein 99d [Drosophila melanogaster]
ABW78837.1 odorant-binding protein 99d [Drosophila melanogaster]
ABW78836.1 odorant-binding protein 99d [Drosophila melanogaster]
ABW78835.1 odorant-binding protein 99d [Drosophila melanogaster]
ABW78834.1 odorant-binding protein 99d [Drosophila melanogaster]
ABW78833.1 odorant-binding protein 99d [Drosophila melanogaster]
ABW78832.1 odorant-binding protein 99d [Drosophila melanogaster]
ABW78831.1 odorant-binding protein 99d [Drosophila melanogaster]
ABW78830.1 odorant-binding protein 99d [Drosophila melanogaster]
ABW78829.1 odorant-binding protein 99d [Drosophila melanogaster]
ABW78828.1 odorant-binding protein 99d [Drosophila melanogaster]
ABW78827.1 odorant-binding protein 99d [Drosophila melanogaster]
ABW78826.1 odorant-binding protein 99d [Drosophila melanogaster]
ABW78825.1 odorant-binding protein 99d [Drosophila melanogaster]
ABW78824.1 odorant-binding protein 99d [Drosophila melanogaster]
ABW78823.1 odorant-binding protein 99d [Drosophila melanogaster]
ABW78822.1 odorant-binding protein 99d [Drosophila melanogaster]
ABW78821.1 odorant-binding protein 99d [Drosophila melanogaster]
ABW78820.1 odorant-binding protein 99d [Drosophila melanogaster]
ABW78819.1 odorant-binding protein 99d [Drosophila melanogaster]
ABW78818.1 odorant-binding protein 99d [Drosophila melanogaster]
ABW78817.1 odorant-binding protein 99d [Drosophila melanogaster]
ABW78816.1 odorant-binding protein 99d [Drosophila melanogaster]
ABW78815.1 odorant-binding protein 99d [Drosophila melanogaster]
ABW78814.1 odorant-binding protein 99d [Drosophila melanogaster]
ABW78813.1 odorant-binding protein 99d [Drosophila melanogaster]
ABW78812.1 odorant-binding protein 99d [Drosophila melanogaster]
ABW78811.1 odorant-binding protein 99d [Drosophila melanogaster]
ABW78810.1 odorant-binding protein 99d [Drosophila melanogaster]
ABW78809.1 odorant-binding protein 99d [Drosophila melanogaster]
ABW78808.1 odorant-binding protein 99d [Drosophila melanogaster]
ABW78807.1 odorant-binding protein 99d [Drosophila melanogaster]
ABW78806.1 odorant-binding protein 99d [Drosophila melanogaster]
ABW78805.1 odorant-binding protein 99d [Drosophila melanogaster]
ABW78804.1 odorant-binding protein 99d [Drosophila melanogaster]
ABW78803.1 odorant-binding protein 99d [Drosophila melanogaster]
ABW78802.1 odorant-binding protein 99d [Drosophila melanogaster]
ABW78801.1 odorant-binding protein 99d [Drosophila melanogaster]
ABW78800.1 odorant-binding protein 99d [Drosophila melanogaster]
ABW78799.1 odorant-binding protein 99d [Drosophila melanogaster]
ABW78798.1 odorant-binding protein 99d [Drosophila melanogaster]
ABW78797.1 odorant-binding protein 99d [Drosophila melanogaster]
ABW78796.1 odorant-binding protein 99d [Drosophila melanogaster]
ABW78795.1 odorant-binding protein 99d [Drosophila melanogaster]
ABW78794.1 odorant-binding protein 99d [Drosophila melanogaster]
ABW78793.1 odorant-binding protein 99d [Drosophila melanogaster]
ABW78792.1 odorant-binding protein 99d [Drosophila melanogaster]
ABW78791.1 odorant-binding protein 99d [Drosophila melanogaster]
ABW78790.1 odorant-binding protein 99d [Drosophila melanogaster]
ABW78789.1 odorant-binding protein 99d [Drosophila melanogaster]
ABW78788.1 odorant-binding protein 99d [Drosophila melanogaster]
ABW78787.1 odorant-binding protein 99d [Drosophila melanogaster]
ABW78786.1 odorant-binding protein 99d [Drosophila melanogaster]
ABW78785.1 odorant-binding protein 99d [Drosophila melanogaster]
ABW78784.1 odorant-binding protein 99d [Drosophila melanogaster]
ABW78783.1 odorant-binding protein 99d [Drosophila melanogaster]
ABW78782.1 odorant-binding protein 99d [Drosophila melanogaster]
ABW78781.1 odorant-binding protein 99d [Drosophila melanogaster]
ABW78780.1 odorant-binding protein 99d [Drosophila melanogaster]
ABW78779.1 odorant-binding protein 99d [Drosophila melanogaster]
ABW78778.1 odorant-binding protein 99d [Drosophila melanogaster]
ABW78777.1 odorant-binding protein 99d [Drosophila melanogaster]
ABW78776.1 odorant-binding protein 99d [Drosophila melanogaster]
ABW78775.1 odorant-binding protein 99d [Drosophila melanogaster]
ABW78774.1 odorant-binding protein 99d [Drosophila melanogaster]
ABW78773.1 odorant-binding protein 99d [Drosophila melanogaster]
ABW78772.1 odorant-binding protein 99d [Drosophila melanogaster]
ABW78771.1 odorant-binding protein 99d [Drosophila melanogaster]
ABW78770.1 odorant-binding protein 99d [Drosophila melanogaster]
ABW78769.1 odorant-binding protein 99d [Drosophila melanogaster]
ABW78768.1 odorant-binding protein 99d [Drosophila melanogaster]
ABW78767.1 odorant-binding protein 99d [Drosophila melanogaster]
ABW78766.1 odorant-binding protein 99d [Drosophila melanogaster]
ABW78765.1 odorant-binding protein 99d [Drosophila melanogaster]
ABW78764.1 odorant-binding protein 99d [Drosophila melanogaster]
ABW78763.1 odorant-binding protein 99d [Drosophila melanogaster]
ABW78762.1 odorant-binding protein 99d [Drosophila melanogaster]
ABW78761.1 odorant-binding protein 99d [Drosophila melanogaster]
ABW78760.1 odorant-binding protein 99d [Drosophila melanogaster]
ABW78759.1 odorant-binding protein 99d [Drosophila melanogaster]
ABW78758.1 odorant-binding protein 99d [Drosophila melanogaster]
ABW78757.1 odorant-binding protein 99d [Drosophila melanogaster]
ABW78756.1 odorant-binding protein 99d [Drosophila melanogaster]
ABW78755.1 odorant-binding protein 99d [Drosophila melanogaster]
ABW78754.1 odorant-binding protein 99d [Drosophila melanogaster]
ABW78753.1 odorant-binding protein 99d [Drosophila melanogaster]
ABW78752.1 odorant-binding protein 99d [Drosophila melanogaster]
ABW78751.1 odorant-binding protein 99d [Drosophila melanogaster]
ABW78750.1 odorant-binding protein 99d [Drosophila melanogaster]
ABW78749.1 odorant-binding protein 99d [Drosophila melanogaster]
ABW78748.1 odorant-binding protein 99d [Drosophila melanogaster]
ABW78747.1 odorant-binding protein 99d [Drosophila melanogaster]
ABW78746.1 odorant-binding protein 99d [Drosophila melanogaster]
ABW78745.1 odorant-binding protein 99d [Drosophila melanogaster]
ABW78744.1 odorant-binding protein 99d [Drosophila melanogaster]
ABW78743.1 odorant-binding protein 99d [Drosophila melanogaster]
ABW78742.1 odorant-binding protein 99d [Drosophila melanogaster]
ABW78741.1 odorant-binding protein 99d [Drosophila melanogaster]
ABW78740.1 odorant-binding protein 99c [Drosophila melanogaster]
ABW78739.1 odorant-binding protein 99c [Drosophila melanogaster]
ABW78738.1 odorant-binding protein 99c [Drosophila melanogaster]
ABW78737.1 odorant-binding protein 99c [Drosophila melanogaster]
ABW78736.1 odorant-binding protein 99c [Drosophila melanogaster]
ABW78735.1 odorant-binding protein 99c [Drosophila melanogaster]
ABW78734.1 odorant-binding protein 99c [Drosophila melanogaster]
ABW78733.1 odorant-binding protein 99c [Drosophila melanogaster]
ABW78732.1 odorant-binding protein 99c [Drosophila melanogaster]
ABW78731.1 odorant-binding protein 99c [Drosophila melanogaster]
ABW78730.1 odorant-binding protein 99c [Drosophila melanogaster]
ABW78729.1 odorant-binding protein 99c [Drosophila melanogaster]
ABW78728.1 odorant-binding protein 99c [Drosophila melanogaster]
ABW78727.1 odorant-binding protein 99c [Drosophila melanogaster]
ABW78726.1 odorant-binding protein 99c [Drosophila melanogaster]
ABW78725.1 odorant-binding protein 99c [Drosophila melanogaster]
ABW78724.1 odorant-binding protein 99c [Drosophila melanogaster]
ABW78723.1 odorant-binding protein 99c [Drosophila melanogaster]
ABW78722.1 odorant-binding protein 99c [Drosophila melanogaster]
ABW78721.1 odorant-binding protein 99c [Drosophila melanogaster]
ABW78720.1 odorant-binding protein 99c [Drosophila melanogaster]
ABW78719.1 odorant-binding protein 99c [Drosophila melanogaster]
ABW78718.1 odorant-binding protein 99c [Drosophila melanogaster]
ABW78717.1 odorant-binding protein 99c [Drosophila melanogaster]
ABW78716.1 odorant-binding protein 99c [Drosophila melanogaster]
ABW78715.1 odorant-binding protein 99c [Drosophila melanogaster]
ABW78714.1 odorant-binding protein 99c [Drosophila melanogaster]
ABW78713.1 odorant-binding protein 99c [Drosophila melanogaster]
ABW78712.1 odorant-binding protein 99c [Drosophila melanogaster]
ABW78711.1 odorant-binding protein 99c [Drosophila melanogaster]
ABW78710.1 odorant-binding protein 99c [Drosophila melanogaster]
ABW78709.1 odorant-binding protein 99c [Drosophila melanogaster]
ABW78708.1 odorant-binding protein 99c [Drosophila melanogaster]
ABW78707.1 odorant-binding protein 99c [Drosophila melanogaster]
ABW78706.1 odorant-binding protein 99c [Drosophila melanogaster]
ABW78705.1 odorant-binding protein 99c [Drosophila melanogaster]
ABW78704.1 odorant-binding protein 99c [Drosophila melanogaster]
ABW78703.1 odorant-binding protein 99c [Drosophila melanogaster]
ABW78702.1 odorant-binding protein 99c [Drosophila melanogaster]
ABW78701.1 odorant-binding protein 99c [Drosophila melanogaster]
ABW78700.1 odorant-binding protein 99c [Drosophila melanogaster]
ABW78699.1 odorant-binding protein 99c [Drosophila melanogaster]
ABW78698.1 odorant-binding protein 99c [Drosophila melanogaster]
ABW78697.1 odorant-binding protein 99c [Drosophila melanogaster]
ABW78696.1 odorant-binding protein 99c [Drosophila melanogaster]
ABW78695.1 odorant-binding protein 99c [Drosophila melanogaster]
ABW78694.1 odorant-binding protein 99c [Drosophila melanogaster]
ABW78693.1 odorant-binding protein 99c [Drosophila melanogaster]
ABW78692.1 odorant-binding protein 99c [Drosophila melanogaster]
ABW78691.1 odorant-binding protein 99c [Drosophila melanogaster]
ABW78690.1 odorant-binding protein 99c [Drosophila melanogaster]
ABW78689.1 odorant-binding protein 99c [Drosophila melanogaster]
ABW78688.1 odorant-binding protein 99c [Drosophila melanogaster]
ABW78687.1 odorant-binding protein 99c [Drosophila melanogaster]
ABW78686.1 odorant-binding protein 99c [Drosophila melanogaster]
ABW78685.1 odorant-binding protein 99c [Drosophila melanogaster]
ABW78684.1 odorant-binding protein 99c [Drosophila melanogaster]
ABW78683.1 odorant-binding protein 99c [Drosophila melanogaster]
ABW78682.1 odorant-binding protein 99c [Drosophila melanogaster]
ABW78681.1 odorant-binding protein 99c [Drosophila melanogaster]
ABW78680.1 odorant-binding protein 99c [Drosophila melanogaster]
ABW78679.1 odorant-binding protein 99c [Drosophila melanogaster]
ABW78678.1 odorant-binding protein 99c [Drosophila melanogaster]
ABW78677.1 odorant-binding protein 99c [Drosophila melanogaster]
ABW78676.1 odorant-binding protein 99c [Drosophila melanogaster]
ABW78675.1 odorant-binding protein 99c [Drosophila melanogaster]
ABW78674.1 odorant-binding protein 99c [Drosophila melanogaster]
ABW78673.1 odorant-binding protein 99c [Drosophila melanogaster]
ABW78672.1 odorant-binding protein 99c [Drosophila melanogaster]
ABW78671.1 odorant-binding protein 99c [Drosophila melanogaster]
ABW78670.1 odorant-binding protein 99c [Drosophila melanogaster]
ABW78669.1 odorant-binding protein 99c [Drosophila melanogaster]
ABW78668.1 odorant-binding protein 99c [Drosophila melanogaster]
ABW78667.1 odorant-binding protein 99c [Drosophila melanogaster]
ABW78666.1 odorant-binding protein 99c [Drosophila melanogaster]
ABW78665.1 odorant-binding protein 99c [Drosophila melanogaster]
ABW78664.1 odorant-binding protein 99c [Drosophila melanogaster]
ABW78663.1 odorant-binding protein 99c [Drosophila melanogaster]
ABW78662.1 odorant-binding protein 99c [Drosophila melanogaster]
ABW78661.1 odorant-binding protein 99c [Drosophila melanogaster]
ABW78660.1 odorant-binding protein 99c [Drosophila melanogaster]
ABW78659.1 odorant-binding protein 99c [Drosophila melanogaster]
ABW78658.1 odorant-binding protein 99c [Drosophila melanogaster]
ABW78657.1 odorant-binding protein 99c [Drosophila melanogaster]
ABW78656.1 odorant-binding protein 99c [Drosophila melanogaster]
ABW78655.1 odorant-binding protein 99c [Drosophila melanogaster]
ABW78654.1 odorant-binding protein 99c [Drosophila melanogaster]
ABW78653.1 odorant-binding protein 99c [Drosophila melanogaster]
ABW78652.1 odorant-binding protein 99c [Drosophila melanogaster]
ABW78651.1 odorant-binding protein 99c [Drosophila melanogaster]
ABW78650.1 odorant-binding protein 99c [Drosophila melanogaster]
ABW78649.1 odorant-binding protein 99c [Drosophila melanogaster]
ABW78648.1 odorant-binding protein 99c [Drosophila melanogaster]
ABW78647.1 odorant-binding protein 99c [Drosophila melanogaster]
ABW78646.1 odorant-binding protein 99c [Drosophila melanogaster]
ABW78645.1 odorant-binding protein 99c [Drosophila melanogaster]
ABW78644.1 odorant-binding protein 99c [Drosophila melanogaster]
ABW78643.1 odorant-binding protein 99c [Drosophila melanogaster]
ABW78642.1 odorant-binding protein 99c [Drosophila melanogaster]
ABW78641.1 odorant-binding protein 99c [Drosophila melanogaster]
ABW78640.1 odorant-binding protein 99c [Drosophila melanogaster]
ABW78639.1 odorant-binding protein 99c [Drosophila melanogaster]
ABW78638.1 odorant-binding protein 99c [Drosophila melanogaster]
ABW78637.1 odorant-binding protein 99c [Drosophila melanogaster]
ABW78636.1 odorant-binding protein 99c [Drosophila melanogaster]
ABW78635.1 odorant-binding protein 99c [Drosophila melanogaster]
ABW78634.1 odorant-binding protein 99c [Drosophila melanogaster]
ABW78633.1 odorant-binding protein 99c [Drosophila melanogaster]
ABW78632.1 odorant-binding protein 99c [Drosophila melanogaster]
ABW78631.1 odorant-binding protein 99c [Drosophila melanogaster]
ABW78630.1 odorant-binding protein 99c [Drosophila melanogaster]
ABW78629.1 odorant-binding protein 99c [Drosophila melanogaster]
ABW78628.1 odorant-binding protein 99c [Drosophila melanogaster]
ABW78627.1 odorant-binding protein 99c [Drosophila melanogaster]
ABW78626.1 odorant-binding protein 99c [Drosophila melanogaster]
ABW78625.1 odorant-binding protein 99c [Drosophila melanogaster]
ABW78624.1 odorant-binding protein 99c [Drosophila melanogaster]
ABW78623.1 odorant-binding protein 99c [Drosophila melanogaster]
ABW78622.1 odorant-binding protein 99c [Drosophila melanogaster]
ABW78621.1 odorant-binding protein 99c [Drosophila melanogaster]
ABW78620.1 odorant-binding protein 99c [Drosophila melanogaster]
ABW78619.1 odorant-binding protein 99c [Drosophila melanogaster]
ABW78618.1 odorant-binding protein 99c [Drosophila melanogaster]
ABW78617.1 odorant-binding protein 99c [Drosophila melanogaster]
ABW78616.1 odorant-binding protein 99c [Drosophila melanogaster]
ABW78615.1 odorant-binding protein 99c [Drosophila melanogaster]
ABW78614.1 odorant-binding protein 99c [Drosophila melanogaster]
ABW78613.1 odorant-binding protein 99c [Drosophila melanogaster]
ABW78612.1 odorant-binding protein 99c [Drosophila melanogaster]
ABW78611.1 odorant-binding protein 99c [Drosophila melanogaster]
ABW78610.1 odorant-binding protein 99c [Drosophila melanogaster]
ABW78609.1 odorant-binding protein 99c [Drosophila melanogaster]
ABW78608.1 odorant-binding protein 99c [Drosophila melanogaster]
ABW78607.1 odorant-binding protein 99c [Drosophila melanogaster]
ABW78606.1 odorant-binding protein 99c [Drosophila melanogaster]
ABW78605.1 odorant-binding protein 99c [Drosophila melanogaster]
ABW78604.1 odorant-binding protein 99c [Drosophila melanogaster]
ABW78603.1 odorant-binding protein 99c [Drosophila melanogaster]
ABW78602.1 odorant-binding protein 99c [Drosophila melanogaster]
ABW78601.1 odorant-binding protein 99c [Drosophila melanogaster]
ABW78600.1 odorant-binding protein 99c [Drosophila melanogaster]
ABW78599.1 odorant-binding protein 99c [Drosophila melanogaster]
ABW78598.1 odorant-binding protein 99c [Drosophila melanogaster]
ABW78597.1 odorant-binding protein 99c [Drosophila melanogaster]
ABW78596.1 odorant-binding protein 99c [Drosophila melanogaster]
ABW78595.1 odorant-binding protein 99c [Drosophila melanogaster]
ABW78594.1 odorant-binding protein 99c [Drosophila melanogaster]
ABW78593.1 odorant-binding protein 99c [Drosophila melanogaster]
ABW78592.1 odorant-binding protein 99c [Drosophila melanogaster]
ABW78591.1 odorant-binding protein 99c [Drosophila melanogaster]
ABW78590.1 odorant-binding protein 99c [Drosophila melanogaster]
ABW78589.1 odorant-binding protein 99c [Drosophila melanogaster]
ABW78588.1 odorant-binding protein 99c [Drosophila melanogaster]
ABW78587.1 odorant-binding protein 99c [Drosophila melanogaster]
ABW78586.1 odorant-binding protein 99c [Drosophila melanogaster]
ABW78585.1 odorant-binding protein 99c [Drosophila melanogaster]
ABW78584.1 odorant-binding protein 99c [Drosophila melanogaster]
ABW78583.1 odorant-binding protein 99c [Drosophila melanogaster]
ABW78582.1 odorant-binding protein 99c [Drosophila melanogaster]
ABW78581.1 odorant-binding protein 99c [Drosophila melanogaster]
ABW78580.1 odorant-binding protein 99c [Drosophila melanogaster]
ABW78579.1 odorant-binding protein 99c [Drosophila melanogaster]
ABW78578.1 odorant-binding protein 99c [Drosophila melanogaster]
ABW78577.1 odorant-binding protein 99c [Drosophila melanogaster]
ABW78576.1 odorant-binding protein 99c [Drosophila melanogaster]
ABW78575.1 odorant-binding protein 99c [Drosophila melanogaster]
ABW78574.1 odorant-binding protein 99c [Drosophila melanogaster]
ABW78573.1 odorant-binding protein 99c [Drosophila melanogaster]
ABW78572.1 odorant-binding protein 99c [Drosophila melanogaster]
ABW78571.1 odorant-binding protein 99c [Drosophila melanogaster]
ABW78570.1 odorant-binding protein 99c [Drosophila melanogaster]
ABW78569.1 odorant-binding protein 99c [Drosophila melanogaster]
ABW78568.1 odorant-binding protein 99c [Drosophila melanogaster]
ABW78567.1 odorant-binding protein 99c [Drosophila melanogaster]
ABW78566.1 odorant-binding protein 99c [Drosophila melanogaster]
ABW78565.1 odorant-binding protein 99c [Drosophila melanogaster]
ABW78564.1 odorant-binding protein 99c [Drosophila melanogaster]
ABW78563.1 odorant-binding protein 99c [Drosophila melanogaster]
ABW78562.1 odorant-binding protein 99c [Drosophila melanogaster]
ABW78561.1 odorant-binding protein 99c [Drosophila melanogaster]
ABW78560.1 odorant-binding protein 99c [Drosophila melanogaster]
ABW78559.1 odorant-binding protein 99c [Drosophila melanogaster]
ABW78558.1 odorant-binding protein 99c [Drosophila melanogaster]
ABW78557.1 odorant-binding protein 99c [Drosophila melanogaster]
ABW78556.1 odorant-binding protein 99c [Drosophila melanogaster]
ABW78555.1 odorant-binding protein 99c [Drosophila melanogaster]
ABW78554.1 odorant-binding protein 99c [Drosophila melanogaster]
ABW78553.1 odorant-binding protein 99c [Drosophila melanogaster]
ABW78552.1 odorant-binding protein 99c [Drosophila melanogaster]
ABW78551.1 odorant-binding protein 99c [Drosophila melanogaster]
ABW78550.1 odorant-binding protein 99c [Drosophila melanogaster]
ABW78549.1 odorant-binding protein 99c [Drosophila melanogaster]
ABW78548.1 odorant-binding protein 99c [Drosophila melanogaster]
ABW78547.1 odorant-binding protein 99b [Drosophila melanogaster]
ABW78546.1 odorant-binding protein 99b [Drosophila melanogaster]
ABW78545.1 odorant-binding protein 99b [Drosophila melanogaster]
ABW78544.1 odorant-binding protein 99b [Drosophila melanogaster]
ABW78543.1 odorant-binding protein 99b [Drosophila melanogaster]
ABW78542.1 odorant-binding protein 99b [Drosophila melanogaster]
ABW78541.1 odorant-binding protein 99b [Drosophila melanogaster]
ABW78540.1 odorant-binding protein 99b [Drosophila melanogaster]
ABW78539.1 odorant-binding protein 99b [Drosophila melanogaster]
ABW78538.1 odorant-binding protein 99b [Drosophila melanogaster]
ABW78537.1 odorant-binding protein 99b [Drosophila melanogaster]
ABW78536.1 odorant-binding protein 99b [Drosophila melanogaster]
ABW78535.1 odorant-binding protein 99b [Drosophila melanogaster]
ABW78534.1 odorant-binding protein 99b [Drosophila melanogaster]
ABW78533.1 odorant-binding protein 99b [Drosophila melanogaster]
ABW78532.1 odorant-binding protein 99b [Drosophila melanogaster]
ABW78531.1 odorant-binding protein 99b [Drosophila melanogaster]
ABW78530.1 odorant-binding protein 99b [Drosophila melanogaster]
ABW78529.1 odorant-binding protein 99b [Drosophila melanogaster]
ABW78528.1 odorant-binding protein 99b [Drosophila melanogaster]
ABW78527.1 odorant-binding protein 99b [Drosophila melanogaster]
ABW78526.1 odorant-binding protein 99b [Drosophila melanogaster]
ABW78525.1 odorant-binding protein 99b [Drosophila melanogaster]
ABW78524.1 odorant-binding protein 99b [Drosophila melanogaster]
ABW78523.1 odorant-binding protein 99b [Drosophila melanogaster]
ABW78522.1 odorant-binding protein 99b [Drosophila melanogaster]
ABW78521.1 odorant-binding protein 99b [Drosophila melanogaster]
ABW78520.1 odorant-binding protein 99b [Drosophila melanogaster]
ABW78519.1 odorant-binding protein 99b [Drosophila melanogaster]
ABW78518.1 odorant-binding protein 99b [Drosophila melanogaster]
ABW78517.1 odorant-binding protein 99b [Drosophila melanogaster]
ABW78516.1 odorant-binding protein 99b [Drosophila melanogaster]
ABW78515.1 odorant-binding protein 99b [Drosophila melanogaster]
ABW78514.1 odorant-binding protein 99b [Drosophila melanogaster]
ABW78513.1 odorant-binding protein 99b [Drosophila melanogaster]
ABW78512.1 odorant-binding protein 99b [Drosophila melanogaster]
ABW78511.1 odorant-binding protein 99b [Drosophila melanogaster]
ABW78510.1 odorant-binding protein 99b [Drosophila melanogaster]
ABW78509.1 odorant-binding protein 99b [Drosophila melanogaster]
ABW78508.1 odorant-binding protein 99b [Drosophila melanogaster]
ABW78507.1 odorant-binding protein 99b [Drosophila melanogaster]
ABW78506.1 odorant-binding protein 99b [Drosophila melanogaster]
ABW78505.1 odorant-binding protein 99b [Drosophila melanogaster]
ABW78504.1 odorant-binding protein 99b [Drosophila melanogaster]
ABW78503.1 odorant-binding protein 99b [Drosophila melanogaster]
ABW78502.1 odorant-binding protein 99b [Drosophila melanogaster]
ABW78501.1 odorant-binding protein 99b [Drosophila melanogaster]
ABW78500.1 odorant-binding protein 99b [Drosophila melanogaster]
ABW78499.1 odorant-binding protein 99b [Drosophila melanogaster]
ABW78498.1 odorant-binding protein 99b [Drosophila melanogaster]
ABW78497.1 odorant-binding protein 99b [Drosophila melanogaster]
ABW78496.1 odorant-binding protein 99b [Drosophila melanogaster]
ABW78495.1 odorant-binding protein 99b [Drosophila melanogaster]
ABW78494.1 odorant-binding protein 99b [Drosophila melanogaster]
ABW78493.1 odorant-binding protein 99b [Drosophila melanogaster]
ABW78492.1 odorant-binding protein 99b [Drosophila melanogaster]
ABW78491.1 odorant-binding protein 99b [Drosophila melanogaster]
ABW78490.1 odorant-binding protein 99b [Drosophila melanogaster]
ABW78489.1 odorant-binding protein 99b [Drosophila melanogaster]
ABW78488.1 odorant-binding protein 99b [Drosophila melanogaster]
ABW78487.1 odorant-binding protein 99b [Drosophila melanogaster]
ABW78486.1 odorant-binding protein 99b [Drosophila melanogaster]
ABW78485.1 odorant-binding protein 99b [Drosophila melanogaster]
ABW78484.1 odorant-binding protein 99b [Drosophila melanogaster]
ABW78483.1 odorant-binding protein 99b [Drosophila melanogaster]
ABW78482.1 odorant-binding protein 99b [Drosophila melanogaster]
ABW78481.1 odorant-binding protein 99b [Drosophila melanogaster]
ABW78480.1 odorant-binding protein 99b [Drosophila melanogaster]
ABW78479.1 odorant-binding protein 99b [Drosophila melanogaster]
ABW78478.1 odorant-binding protein 99b [Drosophila melanogaster]
ABW78477.1 odorant-binding protein 99b [Drosophila melanogaster]
ABW78476.1 odorant-binding protein 99b [Drosophila melanogaster]
ABW78475.1 odorant-binding protein 99b [Drosophila melanogaster]
ABW78474.1 odorant-binding protein 99b [Drosophila melanogaster]
ABW78473.1 odorant-binding protein 99b [Drosophila melanogaster]
ABW78472.1 odorant-binding protein 99b [Drosophila melanogaster]
ABW78471.1 odorant-binding protein 99b [Drosophila melanogaster]
ABW78470.1 odorant-binding protein 99b [Drosophila melanogaster]
ABW78469.1 odorant-binding protein 99b [Drosophila melanogaster]
ABW78468.1 odorant-binding protein 99b [Drosophila melanogaster]
ABW78467.1 odorant-binding protein 99b [Drosophila melanogaster]
ABW78466.1 odorant-binding protein 99b [Drosophila melanogaster]
ABW78465.1 odorant-binding protein 99b [Drosophila melanogaster]
ABW78464.1 odorant-binding protein 99b [Drosophila melanogaster]
ABW78463.1 odorant-binding protein 99b [Drosophila melanogaster]
ABW78462.1 odorant-binding protein 99b [Drosophila melanogaster]
ABW78461.1 odorant-binding protein 99b [Drosophila melanogaster]
ABW78460.1 odorant-binding protein 99b [Drosophila melanogaster]
ABW78459.1 odorant-binding protein 99b [Drosophila melanogaster]
ABW78458.1 odorant-binding protein 99b [Drosophila melanogaster]
ABW78457.1 odorant-binding protein 99b [Drosophila melanogaster]
ABW78456.1 odorant-binding protein 99b [Drosophila melanogaster]
ABW78455.1 odorant-binding protein 99b [Drosophila melanogaster]
ABW78454.1 odorant-binding protein 99b [Drosophila melanogaster]
ABW78453.1 odorant-binding protein 99b [Drosophila melanogaster]
ABW78452.1 odorant-binding protein 99b [Drosophila melanogaster]
ABW78451.1 odorant-binding protein 99b [Drosophila melanogaster]
ABW78450.1 odorant-binding protein 99b [Drosophila melanogaster]
ABW78449.1 odorant-binding protein 99b [Drosophila melanogaster]
ABW78448.1 odorant-binding protein 99b [Drosophila melanogaster]
ABW78447.1 odorant-binding protein 99b [Drosophila melanogaster]
ABW78446.1 odorant-binding protein 99b [Drosophila melanogaster]
ABW78445.1 odorant-binding protein 99b [Drosophila melanogaster]
ABW78444.1 odorant-binding protein 99b [Drosophila melanogaster]
ABW78443.1 odorant-binding protein 99b [Drosophila melanogaster]
ABW78442.1 odorant-binding protein 99b [Drosophila melanogaster]
ABW78441.1 odorant-binding protein 99b [Drosophila melanogaster]
ABW78440.1 odorant-binding protein 99b [Drosophila melanogaster]
ABW78439.1 odorant-binding protein 99b [Drosophila melanogaster]
ABW78438.1 odorant-binding protein 99b [Drosophila melanogaster]
ABW78437.1 odorant-binding protein 99b [Drosophila melanogaster]
ABW78436.1 odorant-binding protein 99b [Drosophila melanogaster]
ABW78435.1 odorant-binding protein 99b [Drosophila melanogaster]
ABW78434.1 odorant-binding protein 99b [Drosophila melanogaster]
ABW78433.1 odorant-binding protein 99b [Drosophila melanogaster]
ABW78432.1 odorant-binding protein 99b [Drosophila melanogaster]
ABW78431.1 odorant-binding protein 99b [Drosophila melanogaster]
ABW78430.1 odorant-binding protein 99b [Drosophila melanogaster]
ABW78429.1 odorant-binding protein 99b [Drosophila melanogaster]
ABW78428.1 odorant-binding protein 99b [Drosophila melanogaster]
ABW78427.1 odorant-binding protein 99b [Drosophila melanogaster]
ABW78426.1 odorant-binding protein 99b [Drosophila melanogaster]
ABW78425.1 odorant-binding protein 99b [Drosophila melanogaster]
ABW78424.1 odorant-binding protein 99b [Drosophila melanogaster]
ABW78423.1 odorant-binding protein 99b [Drosophila melanogaster]
ABW78422.1 odorant-binding protein 99b [Drosophila melanogaster]
ABW78421.1 odorant-binding protein 99b [Drosophila melanogaster]
ABW78420.1 odorant-binding protein 99b [Drosophila melanogaster]
ABW78419.1 odorant-binding protein 99b [Drosophila melanogaster]
ABW78418.1 odorant-binding protein 99b [Drosophila melanogaster]
ABW78417.1 odorant-binding protein 99b [Drosophila melanogaster]
ABW78416.1 odorant-binding protein 99b [Drosophila melanogaster]
ABW78415.1 odorant-binding protein 99b [Drosophila melanogaster]
ABW78414.1 odorant-binding protein 99b [Drosophila melanogaster]
ABW78413.1 odorant-binding protein 99b [Drosophila melanogaster]
ABW78412.1 odorant-binding protein 99b [Drosophila melanogaster]
ABW78411.1 odorant-binding protein 99b [Drosophila melanogaster]
ABW78410.1 odorant-binding protein 99b [Drosophila melanogaster]
ABW78409.1 odorant-binding protein 99b [Drosophila melanogaster]
ABW78408.1 odorant-binding protein 99b [Drosophila melanogaster]
ABW78407.1 odorant-binding protein 99b [Drosophila melanogaster]
ABW78406.1 odorant-binding protein 99b [Drosophila melanogaster]
ABW78405.1 odorant-binding protein 99b [Drosophila melanogaster]
ABW78404.1 odorant-binding protein 99b [Drosophila melanogaster]
ABW78403.1 odorant-binding protein 99b [Drosophila melanogaster]
ABW78402.1 odorant-binding protein 99b [Drosophila melanogaster]
ABW78401.1 odorant-binding protein 99b [Drosophila melanogaster]
ABW78400.1 odorant-binding protein 99b [Drosophila melanogaster]
ABW78399.1 odorant-binding protein 99b [Drosophila melanogaster]
ABW78398.1 odorant-binding protein 99b [Drosophila melanogaster]
ABW78397.1 odorant-binding protein 99b [Drosophila melanogaster]
ABW78396.1 odorant-binding protein 99b [Drosophila melanogaster]
ABW78395.1 odorant-binding protein 99b [Drosophila melanogaster]
ABW78394.1 odorant-binding protein 99b [Drosophila melanogaster]
ABW78393.1 odorant-binding protein 99b [Drosophila melanogaster]
ABW78392.1 odorant-binding protein 99b [Drosophila melanogaster]
ABW78391.1 odorant-binding protein 99b [Drosophila melanogaster]
ABW78390.1 odorant-binding protein 99b [Drosophila melanogaster]
ABW78389.1 odorant-binding protein 99b [Drosophila melanogaster]
ABW78388.1 odorant-binding protein 99b [Drosophila melanogaster]
ABW78387.1 odorant-binding protein 99b [Drosophila melanogaster]
ABW78386.1 odorant-binding protein 99b [Drosophila melanogaster]
ABW78385.1 odorant-binding protein 99b [Drosophila melanogaster]
ABW78384.1 odorant-binding protein 99b [Drosophila melanogaster]
ABW78383.1 odorant-binding protein 99b [Drosophila melanogaster]
ABW78382.1 odorant-binding protein 99b [Drosophila melanogaster]
ABW78381.1 odorant-binding protein 99b [Drosophila melanogaster]
ABW78380.1 odorant-binding protein 99b [Drosophila melanogaster]
ABW78379.1 odorant-binding protein 99b [Drosophila melanogaster]
ABW78378.1 odorant-binding protein 99b [Drosophila melanogaster]
ABW78377.1 odorant-binding protein 99b [Drosophila melanogaster]
ABW78376.1 odorant-binding protein 99b [Drosophila melanogaster]
ABW78375.1 odorant-binding protein 99b [Drosophila melanogaster]
ABW78374.1 odorant-binding protein 99b [Drosophila melanogaster]
ABW78373.1 odorant-binding protein 99b [Drosophila melanogaster]
ABW78372.1 odorant-binding protein 99b [Drosophila melanogaster]
ABW78371.1 odorant-binding protein 99b [Drosophila melanogaster]
ABW78370.1 odorant-binding protein 99b [Drosophila melanogaster]
ABW78369.1 odorant-binding protein 99b [Drosophila melanogaster]
ABW78368.1 odorant-binding protein 99b [Drosophila melanogaster]
ABW78367.1 odorant-binding protein 99b [Drosophila melanogaster]
ABW78366.1 odorant-binding protein 99b [Drosophila melanogaster]
ABW78365.1 odorant-binding protein 99b [Drosophila melanogaster]
ABW78364.1 odorant-binding protein 99b [Drosophila melanogaster]
ABW78363.1 odorant-binding protein 99b [Drosophila melanogaster]
ABW78362.1 odorant-binding protein 99b [Drosophila melanogaster]
ABW78361.1 odorant-binding protein 99b [Drosophila melanogaster]
ABW78360.1 odorant-binding protein 99b [Drosophila melanogaster]
ABW78359.1 odorant-binding protein 99b [Drosophila melanogaster]
ABW78358.1 odorant-binding protein 99b [Drosophila melanogaster]
ABW78357.1 odorant-binding protein 99b [Drosophila melanogaster]
ABW78356.1 odorant-binding protein 99b [Drosophila melanogaster]
ABW78355.1 odorant-binding protein 99b [Drosophila melanogaster]
ABW78354.1 odorant-binding protein 99a [Drosophila melanogaster]
ABW78353.1 odorant-binding protein 99a [Drosophila melanogaster]
ABW78352.1 odorant-binding protein 99a [Drosophila melanogaster]
ABW78351.1 odorant-binding protein 99a [Drosophila melanogaster]
ABW78350.1 odorant-binding protein 99a [Drosophila melanogaster]
ABW78349.1 odorant-binding protein 99a [Drosophila melanogaster]
ABW78348.1 odorant-binding protein 99a [Drosophila melanogaster]
ABW78347.1 odorant-binding protein 99a [Drosophila melanogaster]
ABW78346.1 odorant-binding protein 99a [Drosophila melanogaster]
ABW78345.1 odorant-binding protein 99a [Drosophila melanogaster]
ABW78344.1 odorant-binding protein 99a [Drosophila melanogaster]
ABW78343.1 odorant-binding protein 99a [Drosophila melanogaster]
ABW78342.1 odorant-binding protein 99a [Drosophila melanogaster]
ABW78341.1 odorant-binding protein 99a [Drosophila melanogaster]
ABW78340.1 odorant-binding protein 99a [Drosophila melanogaster]
ABW78339.1 odorant-binding protein 99a [Drosophila melanogaster]
ABW78338.1 odorant-binding protein 99a [Drosophila melanogaster]
ABW78337.1 odorant-binding protein 99a [Drosophila melanogaster]
ABW78336.1 odorant-binding protein 99a [Drosophila melanogaster]
ABW78335.1 odorant-binding protein 99a [Drosophila melanogaster]
ABW78334.1 odorant-binding protein 99a [Drosophila melanogaster]
ABW78333.1 odorant-binding protein 99a [Drosophila melanogaster]
ABW78332.1 odorant-binding protein 99a [Drosophila melanogaster]
ABW78331.1 odorant-binding protein 99a [Drosophila melanogaster]
ABW78330.1 odorant-binding protein 99a [Drosophila melanogaster]
ABW78329.1 odorant-binding protein 99a [Drosophila melanogaster]
ABW78328.1 odorant-binding protein 99a [Drosophila melanogaster]
ABW78327.1 odorant-binding protein 99a [Drosophila melanogaster]
ABW78326.1 odorant-binding protein 99a [Drosophila melanogaster]
ABW78325.1 odorant-binding protein 99a [Drosophila melanogaster]
ABW78324.1 odorant-binding protein 99a [Drosophila melanogaster]
ABW78323.1 odorant-binding protein 99a [Drosophila melanogaster]
ABW78322.1 odorant-binding protein 99a [Drosophila melanogaster]
ABW78321.1 odorant-binding protein 99a [Drosophila melanogaster]
ABW78320.1 odorant-binding protein 99a [Drosophila melanogaster]
ABW78319.1 odorant-binding protein 99a [Drosophila melanogaster]
ABW78318.1 odorant-binding protein 99a [Drosophila melanogaster]
ABW78317.1 odorant-binding protein 99a [Drosophila melanogaster]
ABW78316.1 odorant-binding protein 99a [Drosophila melanogaster]
ABW78315.1 odorant-binding protein 99a [Drosophila melanogaster]
ABW78314.1 odorant-binding protein 99a [Drosophila melanogaster]
ABW78313.1 odorant-binding protein 99a [Drosophila melanogaster]
ABW78312.1 odorant-binding protein 99a [Drosophila melanogaster]
ABW78311.1 odorant-binding protein 99a [Drosophila melanogaster]
ABW78310.1 odorant-binding protein 99a [Drosophila melanogaster]
ABW78309.1 odorant-binding protein 99a [Drosophila melanogaster]
ABW78308.1 odorant-binding protein 99a [Drosophila melanogaster]
ABW78307.1 odorant-binding protein 99a [Drosophila melanogaster]
ABW78306.1 odorant-binding protein 99a [Drosophila melanogaster]
ABW78305.1 odorant-binding protein 99a [Drosophila melanogaster]
ABW78304.1 odorant-binding protein 99a [Drosophila melanogaster]
ABW78303.1 odorant-binding protein 99a [Drosophila melanogaster]
ABW78302.1 odorant-binding protein 99a [Drosophila melanogaster]
ABW78301.1 odorant-binding protein 99a [Drosophila melanogaster]
ABW78300.1 odorant-binding protein 99a [Drosophila melanogaster]
ABW78299.1 odorant-binding protein 99a [Drosophila melanogaster]
ABW78298.1 odorant-binding protein 99a [Drosophila melanogaster]
ABW78297.1 odorant-binding protein 99a [Drosophila melanogaster]
ABW78296.1 odorant-binding protein 99a [Drosophila melanogaster]
ABW78295.1 odorant-binding protein 99a [Drosophila melanogaster]
ABW78294.1 odorant-binding protein 99a [Drosophila melanogaster]
ABW78293.1 odorant-binding protein 99a [Drosophila melanogaster]
ABW78292.1 odorant-binding protein 99a [Drosophila melanogaster]
ABW78291.1 odorant-binding protein 99a [Drosophila melanogaster]
ABW78290.1 odorant-binding protein 99a [Drosophila melanogaster]
ABW78289.1 odorant-binding protein 99a [Drosophila melanogaster]
ABW78288.1 odorant-binding protein 99a [Drosophila melanogaster]
ABW78287.1 odorant-binding protein 99a [Drosophila melanogaster]
ABW78286.1 odorant-binding protein 99a [Drosophila melanogaster]
ABW78285.1 odorant-binding protein 99a [Drosophila melanogaster]
ABW78284.1 odorant-binding protein 99a [Drosophila melanogaster]
ABW78283.1 odorant-binding protein 99a [Drosophila melanogaster]
ABW78282.1 odorant-binding protein 99a [Drosophila melanogaster]
ABW78281.1 odorant-binding protein 99a [Drosophila melanogaster]
ABW78280.1 odorant-binding protein 99a [Drosophila melanogaster]
ABW78279.1 odorant-binding protein 99a [Drosophila melanogaster]
ABW78278.1 odorant-binding protein 99a [Drosophila melanogaster]
ABW78277.1 odorant-binding protein 99a [Drosophila melanogaster]
ABW78276.1 odorant-binding protein 99a [Drosophila melanogaster]
ABW78275.1 odorant-binding protein 99a [Drosophila melanogaster]
ABW78274.1 odorant-binding protein 99a [Drosophila melanogaster]
ABW78273.1 odorant-binding protein 99a [Drosophila melanogaster]
ABW78272.1 odorant-binding protein 99a [Drosophila melanogaster]
ABW78271.1 odorant-binding protein 99a [Drosophila melanogaster]
ABW78270.1 odorant-binding protein 99a [Drosophila melanogaster]
ABW78269.1 odorant-binding protein 99a [Drosophila melanogaster]
ABW78268.1 odorant-binding protein 99a [Drosophila melanogaster]
ABW78267.1 odorant-binding protein 99a [Drosophila melanogaster]
ABW78266.1 odorant-binding protein 99a [Drosophila melanogaster]
ABW78265.1 odorant-binding protein 99a [Drosophila melanogaster]
ABW78264.1 odorant-binding protein 99a [Drosophila melanogaster]
ABW78263.1 odorant-binding protein 99a [Drosophila melanogaster]
ABW78262.1 odorant-binding protein 99a [Drosophila melanogaster]
ABW78261.1 odorant-binding protein 99a [Drosophila melanogaster]
ABW78260.1 odorant-binding protein 99a [Drosophila melanogaster]
ABW78259.1 odorant-binding protein 99a [Drosophila melanogaster]
ABW78258.1 odorant-binding protein 99a [Drosophila melanogaster]
ABW78257.1 odorant-binding protein 99a [Drosophila melanogaster]
ABW78256.1 odorant-binding protein 99a [Drosophila melanogaster]
ABW78255.1 odorant-binding protein 99a [Drosophila melanogaster]
ABW78254.1 odorant-binding protein 99a [Drosophila melanogaster]
ABW78253.1 odorant-binding protein 99a [Drosophila melanogaster]
ABW78252.1 odorant-binding protein 99a [Drosophila melanogaster]
ABW78251.1 odorant-binding protein 99a [Drosophila melanogaster]
ABW78250.1 odorant-binding protein 99a [Drosophila melanogaster]
ABW78249.1 odorant-binding protein 99a [Drosophila melanogaster]
ABW78248.1 odorant-binding protein 99a [Drosophila melanogaster]
ABW78247.1 odorant-binding protein 99a [Drosophila melanogaster]
ABW78246.1 odorant-binding protein 99a [Drosophila melanogaster]
ABW78245.1 odorant-binding protein 99a [Drosophila melanogaster]
ABW78244.1 odorant-binding protein 99a [Drosophila melanogaster]
ABW78243.1 odorant-binding protein 99a [Drosophila melanogaster]
ABW78242.1 odorant-binding protein 99a [Drosophila melanogaster]
ABW78241.1 odorant-binding protein 99a [Drosophila melanogaster]
ABW78240.1 odorant-binding protein 99a [Drosophila melanogaster]
ABW78239.1 odorant-binding protein 99a [Drosophila melanogaster]
ABW78238.1 odorant-binding protein 99a [Drosophila melanogaster]
ABW78237.1 odorant-binding protein 99a [Drosophila melanogaster]
ABW78236.1 odorant-binding protein 99a [Drosophila melanogaster]
ABW78235.1 odorant-binding protein 99a [Drosophila melanogaster]
ABW78234.1 odorant-binding protein 99a [Drosophila melanogaster]
ABW78233.1 odorant-binding protein 99a [Drosophila melanogaster]
ABW78232.1 odorant-binding protein 99a [Drosophila melanogaster]
ABW78231.1 odorant-binding protein 99a [Drosophila melanogaster]
ABW78230.1 odorant-binding protein 99a [Drosophila melanogaster]
ABW78229.1 odorant-binding protein 99a [Drosophila melanogaster]
ABW78228.1 odorant-binding protein 99a [Drosophila melanogaster]
ABW78227.1 odorant-binding protein 99a [Drosophila melanogaster]
ABW78226.1 odorant-binding protein 99a [Drosophila melanogaster]
ABW78225.1 odorant-binding protein 99a [Drosophila melanogaster]
ABW78224.1 odorant-binding protein 99a [Drosophila melanogaster]
ABW78223.1 odorant-binding protein 99a [Drosophila melanogaster]
ABW78222.1 odorant-binding protein 99a [Drosophila melanogaster]
ABW78221.1 odorant-binding protein 99a [Drosophila melanogaster]
ABW78220.1 odorant-binding protein 99a [Drosophila melanogaster]
ABW78219.1 odorant-binding protein 99a [Drosophila melanogaster]
ABW78218.1 odorant-binding protein 99a [Drosophila melanogaster]
ABW78217.1 odorant-binding protein 99a [Drosophila melanogaster]
ABW78216.1 odorant-binding protein 99a [Drosophila melanogaster]
ABW78215.1 odorant-binding protein 99a [Drosophila melanogaster]
ABW78214.1 odorant-binding protein 99a [Drosophila melanogaster]
ABW78213.1 odorant-binding protein 99a [Drosophila melanogaster]
ABW78212.1 odorant-binding protein 99a [Drosophila melanogaster]
ABW78211.1 odorant-binding protein 99a [Drosophila melanogaster]
ABW78210.1 odorant-binding protein 99a [Drosophila melanogaster]
ABW78209.1 odorant-binding protein 99a [Drosophila melanogaster]
ABW78208.1 odorant-binding protein 99a [Drosophila melanogaster]
ABW78207.1 odorant-binding protein 99a [Drosophila melanogaster]
ABW78206.1 odorant-binding protein 99a [Drosophila melanogaster]
ABW78205.1 odorant-binding protein 99a [Drosophila melanogaster]
ABW78204.1 odorant-binding protein 99a [Drosophila melanogaster]
ABW78203.1 odorant-binding protein 99a [Drosophila melanogaster]
ABW78202.1 odorant-binding protein 99a [Drosophila melanogaster]
ABW78201.1 odorant-binding protein 99a [Drosophila melanogaster]
ABW78200.1 odorant-binding protein 99a [Drosophila melanogaster]
ABW78199.1 odorant-binding protein 99a [Drosophila melanogaster]
ABW78198.1 odorant-binding protein 99a [Drosophila melanogaster]
ABW78197.1 odorant-binding protein 99a [Drosophila melanogaster]
ABW78196.1 odorant-binding protein 99a [Drosophila melanogaster]
ABW78195.1 odorant-binding protein 99a [Drosophila melanogaster]
ABW78194.1 odorant-binding protein 99a [Drosophila melanogaster]
ABW78193.1 odorant-binding protein 99a [Drosophila melanogaster]
ABW78192.1 odorant-binding protein 99a [Drosophila melanogaster]
ABW78191.1 odorant-binding protein 99a [Drosophila melanogaster]
ABW78190.1 odorant-binding protein 99a [Drosophila melanogaster]
ABW78189.1 odorant-binding protein 99a [Drosophila melanogaster]
ABW78188.1 odorant-binding protein 99a [Drosophila melanogaster]
ABW78187.1 odorant-binding protein 99a [Drosophila melanogaster]
ABW78186.1 odorant-binding protein 99a [Drosophila melanogaster]
ABW78185.1 odorant-binding protein 99a [Drosophila melanogaster]
ABW78184.1 odorant-binding protein 99a [Drosophila melanogaster]
ABW78183.1 odorant-binding protein 99a [Drosophila melanogaster]
ABW78182.1 odorant-binding protein 99a [Drosophila melanogaster]
ABW78181.1 odorant-binding protein 99a [Drosophila melanogaster]
ABW78180.1 odorant-binding protein 99a [Drosophila melanogaster]
ABW78179.1 odorant-binding protein 99a [Drosophila melanogaster]
ABW78178.1 odorant-binding protein 99a [Drosophila melanogaster]
ABW78177.1 odorant-binding protein 99a [Drosophila melanogaster]
ABW78176.1 odorant-binding protein 99a [Drosophila melanogaster]
ABW78175.1 odorant-binding protein 99a [Drosophila melanogaster]
ABW78174.1 odorant-binding protein 99a [Drosophila melanogaster]
ABW78173.1 odorant-binding protein 99a [Drosophila melanogaster]
ABW78172.1 odorant-binding protein 99a [Drosophila melanogaster]
ABW78171.1 odorant-binding protein 99a [Drosophila melanogaster]
ABW78170.1 odorant-binding protein 99a [Drosophila melanogaster]
ABW78169.1 odorant-binding protein 99a [Drosophila melanogaster]
ABW78168.1 odorant-binding protein 99a [Drosophila melanogaster]
ABW78167.1 odorant-binding protein 99a [Drosophila melanogaster]
ABW78166.1 odorant-binding protein 99a [Drosophila melanogaster]
ABW78165.1 odorant-binding protein 99a [Drosophila melanogaster]
ABW78164.1 odorant-binding protein 99a [Drosophila melanogaster]
ABW78163.1 odorant-binding protein 99a [Drosophila melanogaster]
ABW78162.1 odorant-binding protein 99a [Drosophila melanogaster]
ABW78161.1 odorant-binding protein 56i [Drosophila melanogaster]
ABW78160.1 odorant-binding protein 56i [Drosophila melanogaster]
ABW78159.1 odorant-binding protein 56i [Drosophila melanogaster]
ABW78158.1 odorant-binding protein 56i [Drosophila melanogaster]
ABW78157.1 odorant-binding protein 56i [Drosophila melanogaster]
ABW78156.1 odorant-binding protein 56i [Drosophila melanogaster]
ABW78155.1 odorant-binding protein 56i [Drosophila melanogaster]
ABW78154.1 odorant-binding protein 56i [Drosophila melanogaster]
ABW78153.1 odorant-binding protein 56i [Drosophila melanogaster]
ABW78152.1 odorant-binding protein 56i [Drosophila melanogaster]
ABW78151.1 odorant-binding protein 56i [Drosophila melanogaster]
ABW78150.1 odorant-binding protein 56i [Drosophila melanogaster]
ABW78149.1 odorant-binding protein 56i [Drosophila melanogaster]
ABW78148.1 odorant-binding protein 56i [Drosophila melanogaster]
ABW78147.1 odorant-binding protein 56i [Drosophila melanogaster]
ABW78146.1 odorant-binding protein 56i [Drosophila melanogaster]
ABW78145.1 odorant-binding protein 56i [Drosophila melanogaster]
ABW78144.1 odorant-binding protein 56i [Drosophila melanogaster]
ABW78143.1 odorant-binding protein 56i [Drosophila melanogaster]
ABW78142.1 odorant-binding protein 56i [Drosophila melanogaster]
ABW78141.1 odorant-binding protein 56i [Drosophila melanogaster]
ABW78140.1 odorant-binding protein 56i [Drosophila melanogaster]
ABW78139.1 odorant-binding protein 56i [Drosophila melanogaster]
ABW78138.1 odorant-binding protein 56i [Drosophila melanogaster]
ABW78137.1 odorant-binding protein 56i [Drosophila melanogaster]
ABW78136.1 odorant-binding protein 56i [Drosophila melanogaster]
ABW78135.1 odorant-binding protein 56i [Drosophila melanogaster]
ABW78134.1 odorant-binding protein 56i [Drosophila melanogaster]
ABW78133.1 odorant-binding protein 56i [Drosophila melanogaster]
ABW78132.1 odorant-binding protein 56i [Drosophila melanogaster]
ABW78131.1 odorant-binding protein 56i [Drosophila melanogaster]
ABW78130.1 odorant-binding protein 56i [Drosophila melanogaster]
ABW78129.1 odorant-binding protein 56i [Drosophila melanogaster]
ABW78128.1 odorant-binding protein 56i [Drosophila melanogaster]
ABW78127.1 odorant-binding protein 56i [Drosophila melanogaster]
ABW78126.1 odorant-binding protein 56i [Drosophila melanogaster]
ABW78125.1 odorant-binding protein 56i [Drosophila melanogaster]
ABW78124.1 odorant-binding protein 56i [Drosophila melanogaster]
ABW78123.1 odorant-binding protein 56i [Drosophila melanogaster]
ABW78122.1 odorant-binding protein 56i [Drosophila melanogaster]
ABW78121.1 odorant-binding protein 56i [Drosophila melanogaster]
ABW78120.1 odorant-binding protein 56i [Drosophila melanogaster]
ABW78119.1 odorant-binding protein 56i [Drosophila melanogaster]
ABW78118.1 odorant-binding protein 56i [Drosophila melanogaster]
ABW78117.1 odorant-binding protein 56i [Drosophila melanogaster]
ABW78116.1 odorant-binding protein 56i [Drosophila melanogaster]
ABW78115.1 odorant-binding protein 56i [Drosophila melanogaster]
ABW78114.1 odorant-binding protein 56i [Drosophila melanogaster]
ABW78113.1 odorant-binding protein 56i [Drosophila melanogaster]
ABW78112.1 odorant-binding protein 56i [Drosophila melanogaster]
ABW78111.1 odorant-binding protein 56h [Drosophila melanogaster]
ABW78110.1 odorant-binding protein 56h [Drosophila melanogaster]
ABW78109.1 odorant-binding protein 56h [Drosophila melanogaster]
ABW78108.1 odorant-binding protein 56h [Drosophila melanogaster]
ABW78107.1 odorant-binding protein 56h [Drosophila melanogaster]
ABW78106.1 odorant-binding protein 56h [Drosophila melanogaster]
ABW78105.1 odorant-binding protein 56h [Drosophila melanogaster]
ABW78104.1 odorant-binding protein 56h [Drosophila melanogaster]
ABW78103.1 odorant-binding protein 56h [Drosophila melanogaster]
ABW78102.1 odorant-binding protein 56h [Drosophila melanogaster]
ABW78101.1 odorant-binding protein 56h [Drosophila melanogaster]
ABW78100.1 odorant-binding protein 56h [Drosophila melanogaster]
ABW78099.1 odorant-binding protein 56h [Drosophila melanogaster]
ABW78098.1 odorant-binding protein 56h [Drosophila melanogaster]
ABW78097.1 odorant-binding protein 56h [Drosophila melanogaster]
ABW78096.1 odorant-binding protein 56h [Drosophila melanogaster]
ABW78095.1 odorant-binding protein 56h [Drosophila melanogaster]
ABW78094.1 odorant-binding protein 56h [Drosophila melanogaster]
ABW78093.1 odorant-binding protein 56h [Drosophila melanogaster]
ABW78092.1 odorant-binding protein 56h [Drosophila melanogaster]
ABW78091.1 odorant-binding protein 56h [Drosophila melanogaster]
ABW78090.1 odorant-binding protein 56h [Drosophila melanogaster]
ABW78089.1 odorant-binding protein 56h [Drosophila melanogaster]
ABW78088.1 odorant-binding protein 56h [Drosophila melanogaster]
ABW78087.1 odorant-binding protein 56h [Drosophila melanogaster]
ABW78086.1 odorant-binding protein 56h [Drosophila melanogaster]
ABW78085.1 odorant-binding protein 56h [Drosophila melanogaster]
ABW78084.1 odorant-binding protein 56h [Drosophila melanogaster]
ABW78083.1 odorant-binding protein 56h [Drosophila melanogaster]
ABW78082.1 odorant-binding protein 56h [Drosophila melanogaster]
ABW78081.1 odorant-binding protein 56h [Drosophila melanogaster]
ABW78080.1 odorant-binding protein 56h [Drosophila melanogaster]
ABW78079.1 odorant-binding protein 56h [Drosophila melanogaster]
ABW78078.1 odorant-binding protein 56h [Drosophila melanogaster]
ABW78077.1 odorant-binding protein 56h [Drosophila melanogaster]
ABW78076.1 odorant-binding protein 56h [Drosophila melanogaster]
ABW78075.1 odorant-binding protein 56h [Drosophila melanogaster]
ABW78074.1 odorant-binding protein 56h [Drosophila melanogaster]
ABW78073.1 odorant-binding protein 56h [Drosophila melanogaster]
ABW78072.1 odorant-binding protein 56h [Drosophila melanogaster]
ABW78071.1 odorant-binding protein 56h [Drosophila melanogaster]
ABW78070.1 odorant-binding protein 56h [Drosophila melanogaster]
ABW78069.1 odorant-binding protein 56h [Drosophila melanogaster]
ABW78068.1 odorant-binding protein 56h [Drosophila melanogaster]
ABW78067.1 odorant-binding protein 56h [Drosophila melanogaster]
ABW78066.1 odorant-binding protein 56h [Drosophila melanogaster]
ABW78065.1 odorant-binding protein 56h [Drosophila melanogaster]
ABW78064.1 odorant-binding protein 56h [Drosophila melanogaster]
ABW78063.1 odorant-binding protein 56h [Drosophila melanogaster]
ABW78062.1 odorant-binding protein 56h [Drosophila melanogaster]
ABW78061.1 odorant-binding protein 56g [Drosophila melanogaster]
ABW78060.1 odorant-binding protein 56g [Drosophila melanogaster]
ABW78059.1 odorant-binding protein 56g [Drosophila melanogaster]
ABW78058.1 odorant-binding protein 56g [Drosophila melanogaster]
ABW78057.1 odorant-binding protein 56g [Drosophila melanogaster]
ABW78056.1 odorant-binding protein 56g [Drosophila melanogaster]
ABW78055.1 odorant-binding protein 56g [Drosophila melanogaster]
ABW78054.1 odorant-binding protein 56g [Drosophila melanogaster]
ABW78053.1 odorant-binding protein 56g [Drosophila melanogaster]
ABW78052.1 odorant-binding protein 56g [Drosophila melanogaster]
ABW78051.1 odorant-binding protein 56g [Drosophila melanogaster]
ABW78050.1 odorant-binding protein 56g [Drosophila melanogaster]
ABW78049.1 odorant-binding protein 56g [Drosophila melanogaster]
ABW78048.1 odorant-binding protein 56g [Drosophila melanogaster]
ABW78047.1 odorant-binding protein 56g [Drosophila melanogaster]
ABW78046.1 odorant-binding protein 56g [Drosophila melanogaster]
ABW78045.1 odorant-binding protein 56g [Drosophila melanogaster]
ABW78044.1 odorant-binding protein 56g [Drosophila melanogaster]
ABW78043.1 odorant-binding protein 56g [Drosophila melanogaster]
ABW78042.1 odorant-binding protein 56g [Drosophila melanogaster]
ABW78041.1 odorant-binding protein 56g [Drosophila melanogaster]
ABW78040.1 odorant-binding protein 56g [Drosophila melanogaster]
ABW78039.1 odorant-binding protein 56g [Drosophila melanogaster]
ABW78038.1 odorant-binding protein 56g [Drosophila melanogaster]
ABW78037.1 odorant-binding protein 56g [Drosophila melanogaster]
ABW78036.1 odorant-binding protein 56g [Drosophila melanogaster]
ABW78035.1 odorant-binding protein 56g [Drosophila melanogaster]
ABW78034.1 odorant-binding protein 56g [Drosophila melanogaster]
ABW78033.1 odorant-binding protein 56g [Drosophila melanogaster]
ABW78032.1 odorant-binding protein 56g [Drosophila melanogaster]
ABW78031.1 odorant-binding protein 56g [Drosophila melanogaster]
ABW78030.1 odorant-binding protein 56g [Drosophila melanogaster]
ABW78029.1 odorant-binding protein 56g [Drosophila melanogaster]
ABW78028.1 odorant-binding protein 56g [Drosophila melanogaster]
ABW78027.1 odorant-binding protein 56g [Drosophila melanogaster]
ABW78026.1 odorant-binding protein 56g [Drosophila melanogaster]
ABW78025.1 odorant-binding protein 56g [Drosophila melanogaster]
ABW78024.1 odorant-binding protein 56g [Drosophila melanogaster]
ABW78023.1 odorant-binding protein 56g [Drosophila melanogaster]
ABW78022.1 odorant-binding protein 56g [Drosophila melanogaster]
ABW78021.1 odorant-binding protein 56g [Drosophila melanogaster]
ABW78020.1 odorant-binding protein 56g [Drosophila melanogaster]
ABW78019.1 odorant-binding protein 56g [Drosophila melanogaster]
ABW78018.1 odorant-binding protein 56g [Drosophila melanogaster]
ABW78017.1 odorant-binding protein 56g [Drosophila melanogaster]
ABW78016.1 odorant-binding protein 56g [Drosophila melanogaster]
ABW78015.1 odorant-binding protein 56g [Drosophila melanogaster]
ABW78014.1 odorant-binding protein 56g [Drosophila melanogaster]
ABW78013.1 odorant-binding protein 56g [Drosophila melanogaster]
ABW78012.1 odorant-binding protein 56g [Drosophila melanogaster]
ABW78011.1 odorant-binding protein 56f [Drosophila melanogaster]
ABW78010.1 odorant-binding protein 56f [Drosophila melanogaster]
ABW78009.1 odorant-binding protein 56f [Drosophila melanogaster]
ABW78008.1 odorant-binding protein 56f [Drosophila melanogaster]
ABW78007.1 odorant-binding protein 56f [Drosophila melanogaster]
ABW78006.1 odorant-binding protein 56f [Drosophila melanogaster]
ABW78005.1 odorant-binding protein 56f [Drosophila melanogaster]
ABW78004.1 odorant-binding protein 56f [Drosophila melanogaster]
ABW78003.1 odorant-binding protein 56f [Drosophila melanogaster]
ABW78002.1 odorant-binding protein 56f [Drosophila melanogaster]
ABW78001.1 odorant-binding protein 56f [Drosophila melanogaster]
ABW78000.1 odorant-binding protein 56f [Drosophila melanogaster]
ABW77999.1 odorant-binding protein 56f [Drosophila melanogaster]
ABW77998.1 odorant-binding protein 56f [Drosophila melanogaster]
ABW77997.1 odorant-binding protein 56f [Drosophila melanogaster]
ABW77996.1 odorant-binding protein 56f [Drosophila melanogaster]
ABW77995.1 odorant-binding protein 56f [Drosophila melanogaster]
ABW77994.1 odorant-binding protein 56f [Drosophila melanogaster]
ABW77993.1 odorant-binding protein 56f [Drosophila melanogaster]
ABW77992.1 odorant-binding protein 56f [Drosophila melanogaster]
ABW77991.1 odorant-binding protein 56f [Drosophila melanogaster]
ABW77990.1 odorant-binding protein 56f [Drosophila melanogaster]
ABW77989.1 odorant-binding protein 56f [Drosophila melanogaster]
ABW77988.1 odorant-binding protein 56f [Drosophila melanogaster]
ABW77987.1 odorant-binding protein 56f [Drosophila melanogaster]
ABW77986.1 odorant-binding protein 56f [Drosophila melanogaster]
ABW77985.1 odorant-binding protein 56f [Drosophila melanogaster]
ABW77984.1 odorant-binding protein 56f [Drosophila melanogaster]
ABW77983.1 odorant-binding protein 56f [Drosophila melanogaster]
ABW77982.1 odorant-binding protein 56f [Drosophila melanogaster]
ABW77981.1 odorant-binding protein 56f [Drosophila melanogaster]
ABW77980.1 odorant-binding protein 56f [Drosophila melanogaster]
ABW77979.1 odorant-binding protein 56f [Drosophila melanogaster]
ABW77978.1 odorant-binding protein 56f [Drosophila melanogaster]
ABW77977.1 odorant-binding protein 56f [Drosophila melanogaster]
ABW77976.1 odorant-binding protein 56f [Drosophila melanogaster]
ABW77975.1 odorant-binding protein 56f [Drosophila melanogaster]
ABW77974.1 odorant-binding protein 56f [Drosophila melanogaster]
ABW77973.1 odorant-binding protein 56f [Drosophila melanogaster]
ABW77972.1 odorant-binding protein 56f [Drosophila melanogaster]
ABW77971.1 odorant-binding protein 56f [Drosophila melanogaster]
ABW77970.1 odorant-binding protein 56f [Drosophila melanogaster]
ABW77969.1 odorant-binding protein 56f [Drosophila melanogaster]
ABW77968.1 odorant-binding protein 56f [Drosophila melanogaster]
ABW77967.1 odorant-binding protein 56f [Drosophila melanogaster]
ABW77966.1 odorant-binding protein 56f [Drosophila melanogaster]
ABW77965.1 odorant-binding protein 56f [Drosophila melanogaster]
ABW77964.1 odorant-binding protein 56f [Drosophila melanogaster]
ABW77963.1 odorant-binding protein 56f [Drosophila melanogaster]
ABW77962.1 odorant-binding protein 56f [Drosophila melanogaster]
ABW77961.1 odorant-binding protein 56e [Drosophila melanogaster]
ABW77960.1 odorant-binding protein 56e [Drosophila melanogaster]
ABW77959.1 odorant-binding protein 56e [Drosophila melanogaster]
ABW77958.1 odorant-binding protein 56e [Drosophila melanogaster]
ABW77957.1 odorant-binding protein 56e [Drosophila melanogaster]
ABW77956.1 odorant-binding protein 56e [Drosophila melanogaster]
ABW77955.1 odorant-binding protein 56e [Drosophila melanogaster]
ABW77954.1 odorant-binding protein 56e [Drosophila melanogaster]
ABW77953.1 odorant-binding protein 56e [Drosophila melanogaster]
ABW77952.1 odorant-binding protein 56e [Drosophila melanogaster]
ABW77951.1 odorant-binding protein 56e [Drosophila melanogaster]
ABW77950.1 odorant-binding protein 56e [Drosophila melanogaster]
ABW77949.1 odorant-binding protein 56e [Drosophila melanogaster]
ABW77948.1 odorant-binding protein 56e [Drosophila melanogaster]
ABW77947.1 odorant-binding protein 56e [Drosophila melanogaster]
ABW77946.1 odorant-binding protein 56e [Drosophila melanogaster]
ABW77945.1 odorant-binding protein 56e [Drosophila melanogaster]
ABW77944.1 odorant-binding protein 56e [Drosophila melanogaster]
ABW77943.1 odorant-binding protein 56e [Drosophila melanogaster]
ABW77942.1 odorant-binding protein 56e [Drosophila melanogaster]
ABW77941.1 odorant-binding protein 56e [Drosophila melanogaster]
ABW77940.1 odorant-binding protein 56e [Drosophila melanogaster]
ABW77939.1 odorant-binding protein 56e [Drosophila melanogaster]
ABW77938.1 odorant-binding protein 56e [Drosophila melanogaster]
ABW77937.1 odorant-binding protein 56e [Drosophila melanogaster]
ABW77936.1 odorant-binding protein 56e [Drosophila melanogaster]
ABW77935.1 odorant-binding protein 56e [Drosophila melanogaster]
ABW77934.1 odorant-binding protein 56e [Drosophila melanogaster]
ABW77933.1 odorant-binding protein 56e [Drosophila melanogaster]
ABW77932.1 odorant-binding protein 56e [Drosophila melanogaster]
ABW77931.1 odorant-binding protein 56e [Drosophila melanogaster]
ABW77930.1 odorant-binding protein 56e [Drosophila melanogaster]
ABW77929.1 odorant-binding protein 56e [Drosophila melanogaster]
ABW77928.1 odorant-binding protein 56e [Drosophila melanogaster]
ABW77927.1 odorant-binding protein 56e [Drosophila melanogaster]
ABW77926.1 odorant-binding protein 56e [Drosophila melanogaster]
ABW77925.1 odorant-binding protein 56e [Drosophila melanogaster]
ABW77924.1 odorant-binding protein 56e [Drosophila melanogaster]
ABW77923.1 odorant-binding protein 56e [Drosophila melanogaster]
ABW77922.1 odorant-binding protein 56e [Drosophila melanogaster]
ABW77921.1 odorant-binding protein 56e [Drosophila melanogaster]
ABW77920.1 odorant-binding protein 56e [Drosophila melanogaster]
ABW77919.1 odorant-binding protein 56e [Drosophila melanogaster]
ABW77918.1 odorant-binding protein 56e [Drosophila melanogaster]
ABW77917.1 odorant-binding protein 56e [Drosophila melanogaster]
ABW77916.1 odorant-binding protein 56e [Drosophila melanogaster]
ABW77915.1 odorant-binding protein 56e [Drosophila melanogaster]
ABW77914.1 odorant-binding protein 56e [Drosophila melanogaster]
ABW77913.1 odorant-binding protein 56e [Drosophila melanogaster]
ABW77912.1 odorant-binding protein 56e [Drosophila melanogaster]
ABW77812.1 odorant-binding protein 56a [Drosophila melanogaster]
ABW77811.1 odorant-binding protein 56a [Drosophila melanogaster]
ABW77810.1 odorant-binding protein 56a [Drosophila melanogaster]
ABW77809.1 odorant-binding protein 56a [Drosophila melanogaster]
ABW77808.1 odorant-binding protein 56a [Drosophila melanogaster]
ABW77807.1 odorant-binding protein 56a [Drosophila melanogaster]
ABW77806.1 odorant-binding protein 56a [Drosophila melanogaster]
ABW77805.1 odorant-binding protein 56a [Drosophila melanogaster]
ABW77804.1 odorant-binding protein 56a [Drosophila melanogaster]
ABW77803.1 odorant-binding protein 56a [Drosophila melanogaster]
ABW77802.1 odorant-binding protein 56a [Drosophila melanogaster]
ABW77801.1 odorant-binding protein 56a [Drosophila melanogaster]
ABW77800.1 odorant-binding protein 56a [Drosophila melanogaster]
ABW77799.1 odorant-binding protein 56a [Drosophila melanogaster]
ABW77798.1 odorant-binding protein 56a [Drosophila melanogaster]
ABW77797.1 odorant-binding protein 56a [Drosophila melanogaster]
ABW77796.1 odorant-binding protein 56a [Drosophila melanogaster]
ABW77795.1 odorant-binding protein 56a [Drosophila melanogaster]
ABW77794.1 odorant-binding protein 56a [Drosophila melanogaster]
ABW77793.1 odorant-binding protein 56a [Drosophila melanogaster]
ABW77792.1 odorant-binding protein 56a [Drosophila melanogaster]
ABW77791.1 odorant-binding protein 56a [Drosophila melanogaster]
ABW77790.1 odorant-binding protein 56a [Drosophila melanogaster]
ABW77789.1 odorant-binding protein 56a [Drosophila melanogaster]
ABW77788.1 odorant-binding protein 56a [Drosophila melanogaster]
ABW77787.1 odorant-binding protein 56a [Drosophila melanogaster]
ABW77786.1 odorant-binding protein 56a [Drosophila melanogaster]
ABW77785.1 odorant-binding protein 56a [Drosophila melanogaster]
ABW77784.1 odorant-binding protein 56a [Drosophila melanogaster]
ABW77783.1 odorant-binding protein 56a [Drosophila melanogaster]
ABW77782.1 odorant-binding protein 56a [Drosophila melanogaster]
ABW77781.1 odorant-binding protein 56a [Drosophila melanogaster]
ABW77780.1 odorant-binding protein 56a [Drosophila melanogaster]
ABW77779.1 odorant-binding protein 56a [Drosophila melanogaster]
ABW77778.1 odorant-binding protein 56a [Drosophila melanogaster]
ABW77777.1 odorant-binding protein 56a [Drosophila melanogaster]
ABW77776.1 odorant-binding protein 56a [Drosophila melanogaster]
ABW77775.1 odorant-binding protein 56a [Drosophila melanogaster]
ABW77774.1 odorant-binding protein 56a [Drosophila melanogaster]
ABW77773.1 odorant-binding protein 56a [Drosophila melanogaster]
ABW77772.1 odorant-binding protein 56a [Drosophila melanogaster]
ABW77771.1 odorant-binding protein 56a [Drosophila melanogaster]
ABW77770.1 odorant-binding protein 56a [Drosophila melanogaster]
ABW77769.1 odorant-binding protein 56a [Drosophila melanogaster]
ABW77768.1 odorant-binding protein 56a [Drosophila melanogaster]
ABW77767.1 odorant-binding protein 56a [Drosophila melanogaster]
ABW77766.1 odorant-binding protein 56a [Drosophila melanogaster]
ABW77765.1 odorant-binding protein 56a [Drosophila melanogaster]
ABW77764.1 odorant-binding protein 56a [Drosophila melanogaster]
ABW77763.1 odorant-binding protein 56a [Drosophila melanogaster]
AAM69287.1 odorant binding protein g [Drosophila melanogaster]
AAM69286.1 odorant binding protein f [Drosophila melanogaster]
AAM69285.1 odorant binding protein e [Drosophila melanogaster]
AAM69284.1 odorant binding protein d [Drosophila melanogaster]
AAM69283.1 odorant binding protein c [Drosophila melanogaster]
AAM69282.1 odorant binding protein b [Drosophila melanogaster]
AAM69281.1 odorant binding protein a [Drosophila melanogaster]
AAB58940.1 odorant binding protein LUSH [Drosophila melanogaster]
BAD83916.1 Odorant-binding protein 57e [Drosophila melanogaster]
BAD83915.1 Odorant-binding protein 57d, partial [Drosophila melanogaster]
BAD83914.1 Odorant-binding protein 57e [Drosophila melanogaster]
BAD83913.1 Odorant-binding protein 57d, partial [Drosophila melanogaster]
BAD83912.1 Odorant-binding protein 57d, partial [Drosophila melanogaster]
BAD83911.1 Odorant-binding protein 57d, partial [Drosophila melanogaster]
BAD83910.1 Odorant-binding protein 57d, partial [Drosophila melanogaster]
BAD83907.1 Odorant-binding protein 57d [Drosophila melanogaster]
BAD83906.1 Odorant-binding protein 57e [Drosophila melanogaster]
BAD83905.1 Odorant-binding protein 57d [Drosophila melanogaster]
BAD83904.1 Odorant-binding protein 57d [Drosophila melanogaster]
BAD83903.1 Odorant-binding protein 57d [Drosophila melanogaster]
BAD83902.1 Odorant-binding protein 57d [Drosophila melanogaster]
BAD83901.1 Odorant-binding protein 57d [Drosophila melanogaster]
BAD83900.1 Odorant-binding protein 57d [Drosophila melanogaster]
BAD83899.1 Odorant-binding protein 57d [Drosophila melanogaster]
BAD83898.1 Odorant-binding protein 57d [Drosophila melanogaster]
BAD83897.1 Odorant-binding protein 57d [Drosophila melanogaster]
BAD83896.1 Odorant-binding protein 57d [Drosophila melanogaster]
BAD83895.1 Odorant-binding protein 57d [Drosophila melanogaster]
BAD83894.1 Odorant-binding protein 57d [Drosophila melanogaster]
BAD83893.1 Odorant-binding protein 57d [Drosophila melanogaster]
BAD83892.1 Odorant-binding protein 57e [Drosophila melanogaster]
BAD83891.1 Odorant-binding protein 57d [Drosophila melanogaster]
BAD83890.1 Odorant-binding protein 57e [Drosophila melanogaster]
BAD83889.1 Odorant-binding protein 57d [Drosophila melanogaster]
BAD83888.1 Odorant-binding protein 57e [Drosophila melanogaster]
BAD83887.1 Odorant-binding protein 57d [Drosophila melanogaster]
BAD83886.1 Odorant-binding protein 57e [Drosophila melanogaster]
BAD83885.1 Odorant-binding protein 57d [Drosophila melanogaster]
XP_026812533.1 general odorant-binding protein 28a [Rhopalosiphum maidis]
XP_026811816.1 general odorant-binding protein 72-like [Rhopalosiphum maidis]
XP_026810935.1 putative odorant-binding protein A10 [Rhopalosiphum maidis]
XP_026810934.1 putative odorant-binding protein A10 [Rhopalosiphum maidis]
XP_026809883.1 general odorant-binding protein 70 [Rhopalosiphum maidis]
AYN61082.1 odorant-binding protein 21 [Yemma signatus]
AYN61081.1 odorant-binding protein 5 [Yemma signatus]
AYN07362.1 odorant-binding protein 22 [Yemma signatus]
AYN07361.1 odorant-binding protein 20 [Yemma signatus]
AYN07360.1 odorant-binding protein 19 [Yemma signatus]
AYN07359.1 odorant-binding protein 18 [Yemma signatus]
AYN07358.1 odorant-binding protein 17 [Yemma signatus]
AYN07357.1 odorant-binding protein 16 [Yemma signatus]
AYN07356.1 odorant-binding protein 15 [Yemma signatus]
AYN07355.1 odorant-binding protein 14 [Yemma signatus]
AYN07354.1 odorant-binding protein 13 [Yemma signatus]
AYN07353.1 odorant-binding protein 12 [Yemma signatus]
AYN07352.1 odorant-binding protein 11 [Yemma signatus]
AYN07351.1 odorant-binding protein 10 [Yemma signatus]
AYN07350.1 odorant-binding protein 9 [Yemma signatus]
AYN07349.1 odorant-binding protein 8 [Yemma signatus]
AYN07348.1 odorant-binding protein 7 [Yemma signatus]
AYN07347.1 odorant-binding protein 6 [Yemma signatus]
AYN07346.1 odorant-binding protein 4 [Yemma signatus]
AYN07345.1 odorant-binding protein 3 [Yemma signatus]
AYN07344.1 odorant-binding protein 2 [Yemma signatus]
AYN07343.1 odorant-binding protein 1 [Yemma signatus]
NP_001353810.1 odorant-binding protein precursor [Acyrthosiphon pisum]
XP_026679569.1 general odorant-binding protein 70 [Diaphorina citri]
XP_026680701.1 putative odorant-binding protein A10 [Diaphorina citri]
XP_008481290.1 putative odorant-binding protein A10 [Diaphorina citri]
XP_008473937.1 putative odorant-binding protein A10 [Diaphorina citri]
XP_008473927.1 putative odorant-binding protein A10 [Diaphorina citri]
XP_008470659.1 general odorant-binding protein 83a-like [Diaphorina citri]
AXY87869.1 odorant binding protein 10 [Subpsaltria yangi]
AXY87868.1 odorant binding protein 9 [Subpsaltria yangi]
AXY87867.1 odorant binding protein 8 [Subpsaltria yangi]
AXY87866.1 odorant binding protein 7 [Subpsaltria yangi]
AXY87865.1 odorant binding protein 6, partial [Subpsaltria yangi]
AXY87864.1 odorant binding protein 5 [Subpsaltria yangi]
AXY87863.1 odorant binding protein 4 [Subpsaltria yangi]
AXY87862.1 odorant binding protein 3 [Subpsaltria yangi]
AXY87861.1 odorant binding protein 2 [Subpsaltria yangi]
AXY87860.1 odorant binding protein 1 [Subpsaltria yangi]
AXU25084.1 odorant-binding protein 19 [Cyrtorhinus lividipennis]
AXU25083.1 odorant-binding protein 18 [Cyrtorhinus lividipennis]
AXU25082.1 odorant-binding protein 17 [Cyrtorhinus lividipennis]
AXU25081.1 odorant-binding protein 16 [Cyrtorhinus lividipennis]
AXU25080.1 odorant-binding protein 15 [Cyrtorhinus lividipennis]
AXU25079.1 odorant-binding protein 14 [Cyrtorhinus lividipennis]
AXU25078.1 odorant-binding protein 13 [Cyrtorhinus lividipennis]
AXU25077.1 odorant-binding protein 12 [Cyrtorhinus lividipennis]
AXU25076.1 odorant-binding protein 11 [Cyrtorhinus lividipennis]
AXS78228.1 odorant-binding protein 33, partial [Adelphocoris lineolatus]
AXS78227.1 odorant-binding protein 31, partial [Adelphocoris lineolatus]
AXS78226.1 odorant-binding protein 30, partial [Adelphocoris lineolatus]
AXS78225.1 odorant-binding protein 34 [Adelphocoris lineolatus]
AXS78224.1 odorant-binding protein 32 [Adelphocoris lineolatus]
AXS78223.1 odorant-binding protein 29 [Adelphocoris lineolatus]
AXS78213.1 odorant-binding protein 28 [Adelphocoris lineolatus]
AXS78212.1 odorant-binding protein 27 [Adelphocoris lineolatus]
AXS78211.1 odorant-binding protein 26 [Adelphocoris lineolatus]
AXS78210.1 odorant-binding protein 25 [Adelphocoris lineolatus]
AXS78209.1 odorant-binding protein 24 [Adelphocoris lineolatus]
AXS78208.1 odorant-binding protein 23 [Adelphocoris lineolatus]
AXS78207.1 odorant-binding protein 22 [Adelphocoris lineolatus]
AXS78206.1 odorant-binding protein 21 [Adelphocoris lineolatus]
AXS78205.1 odorant-binding protein 20 [Adelphocoris lineolatus]
AXS78204.1 odorant-binding protein 19 [Adelphocoris lineolatus]
AXS78203.1 odorant-binding protein 18 [Adelphocoris lineolatus]
AWC68019.1 odorant-binding protein 4 [Empoasca onukii]
AWC68018.1 odorant-binding protein 49, partial [Empoasca onukii]
AWC68017.1 odorant-binding protein 48, partial [Empoasca onukii]
AWC68016.1 odorant-binding protein 47, partial [Empoasca onukii]
AWC68015.1 odorant-binding protein 6 [Empoasca onukii]
AWC68014.1 odorant-binding protein 13 [Empoasca onukii]
AWC68013.1 odorant-binding protein 46 [Empoasca onukii]
AWC68012.1 odorant-binding protein 18 [Empoasca onukii]
AWC68011.1 odorant-binding protein 22 [Empoasca onukii]
AWC68010.1 odorant-binding protein 30 [Empoasca onukii]
AWC68009.1 odorant-binding protein 21 [Empoasca onukii]
AWC68008.1 odorant-binding protein 28 [Empoasca onukii]
AWC68007.1 odorant-binding protein 29 [Empoasca onukii]
AWC68006.1 odorant-binding protein 17 [Empoasca onukii]
AWC68005.1 odorant-binding protein 19 [Empoasca onukii]
AWC68004.1 odorant-binding protein 14 [Empoasca onukii]
AWC68003.1 odorant-binding protein 45 [Empoasca onukii]
AWC68002.1 odorant-binding protein 38 [Empoasca onukii]
AWC68001.1 odorant-binding protein 10 [Empoasca onukii]
AWC68000.1 odorant-binding protein 7 [Empoasca onukii]
AWC67999.1 odorant-binding protein 44 [Empoasca onukii]
AWC67998.1 odorant-binding protein 43 [Empoasca onukii]
AWC67997.1 odorant-binding protein 42 [Empoasca onukii]
AWC67996.1 odorant-binding protein 3 [Empoasca onukii]
AWC67995.1 odorant-binding protein 41 [Empoasca onukii]
AWC67994.1 odorant-binding protein 2 [Empoasca onukii]
AWC67993.1 odorant-binding protein 5 [Empoasca onukii]
AWC67992.1 odorant-binding protein 12 [Empoasca onukii]
AWC67991.1 odorant-binding protein 1 [Empoasca onukii]
AWC67990.1 odorant-binding protein 8 [Empoasca onukii]
AWC67989.1 odorant-binding protein 16 [Empoasca onukii]
AWC67988.1 odorant-binding protein 39 [Empoasca onukii]
AWC67987.1 odorant-binding protein 11 [Empoasca onukii]
AXB87334.1 odorant-binding protein 19 [Tropidothorax elegans]
AXB87333.1 odorant-binding protein 18 [Tropidothorax elegans]
AXB87332.1 odorant-binding protein 17 [Tropidothorax elegans]
AXB87331.1 odorant-binding protein 16 [Tropidothorax elegans]
AXB87330.1 odorant-binding protein 15 [Tropidothorax elegans]
AXB87329.1 odorant-binding protein 14 [Tropidothorax elegans]
AXB87328.1 odorant-binding protein 13 [Tropidothorax elegans]
AXB87327.1 odorant-binding protein 12 [Tropidothorax elegans]
AXB87326.1 odorant-binding protein 11 [Tropidothorax elegans]
AXB87325.1 odorant-binding protein 10 [Tropidothorax elegans]
AXB87324.1 odorant-binding protein 9 [Tropidothorax elegans]
AXB87323.1 odorant-binding protein 8 [Tropidothorax elegans]
AXB87322.1 odorant-binding protein 7 [Tropidothorax elegans]
AXB87321.1 odorant-binding protein 6, partial [Tropidothorax elegans]
AXB87320.1 odorant-binding protein 5 [Tropidothorax elegans]
AXB87319.1 odorant-binding protein 4, partial [Tropidothorax elegans]
AXB87318.1 odorant-binding protein 3 [Tropidothorax elegans]
AXB87317.1 odorant-binding protein 2, partial [Tropidothorax elegans]
AXB87316.1 odorant-binding protein 1 [Tropidothorax elegans]
XP_025421305.1 general odorant-binding protein 28a [Sipha flava]
XP_025418416.1 general odorant-binding protein 70 [Sipha flava]
XP_025415470.1 putative odorant-binding protein A10 [Sipha flava]
XP_025415464.1 putative odorant-binding protein A10 [Sipha flava]
XP_025425183.1 putative odorant-binding protein A5 isoform X2 [Sipha flava]
XP_025206550.1 general odorant-binding protein 70 [Melanaphis sacchari]
XP_025202869.1 general odorant-binding protein 19d [Melanaphis sacchari]
XP_025196155.1 general odorant-binding protein 28a [Melanaphis sacchari]
XP_025190479.1 putative odorant-binding protein A10 [Melanaphis sacchari]
XP_025190208.1 putative odorant-binding protein A10 [Melanaphis sacchari]
XP_025208704.1 putative odorant-binding protein A10 [Melanaphis sacchari]
XP_025208687.1 putative odorant-binding protein A10 [Melanaphis sacchari]
AWW17241.1 odorant-binding protein 7 [Riptortus pedestris]
AWW17240.1 odorant-binding protein 6 [Riptortus pedestris]
AWW17239.1 odorant-binding protein 5, partial [Riptortus pedestris]
AWW17238.1 odorant-binding protein 4 [Riptortus pedestris]
AWW17237.1 odorant-binding protein 3, partial [Riptortus pedestris]
AWW17236.1 odorant-binding protein 2 [Riptortus pedestris]
AWW17235.1 odorant-binding protein 1 [Riptortus pedestris]
AWV63289.1 odorant-binding protein 10 [Myzus persicae]
AWV63288.1 odorant-binding protein 9 [Myzus persicae]
AWV63287.1 odorant-binding protein 8 [Myzus persicae]
AWV63286.1 odorant-binding protein 7 [Myzus persicae]
AWV63285.1 odorant-binding protein 6 [Myzus persicae]
AWV63284.1 odorant-binding protein 5 [Myzus persicae]
AWV63283.1 odorant-binding protein 4 [Myzus persicae]
AWV63282.1 odorant-binding protein 3 [Myzus persicae]
AWV63281.1 odorant-binding protein 2 [Myzus persicae]
XP_024219595.1 general odorant-binding protein 66 [Halyomorpha halys]
XP_014288836.2 putative odorant-binding protein A10 isoform X1 [Halyomorpha halys]
XP_024218190.1 general odorant-binding protein 1 [Halyomorpha halys]
XP_014293023.1 general odorant-binding protein 19d-like [Halyomorpha halys]
XP_014292092.1 general odorant-binding protein 19d-like [Halyomorpha halys]
XP_014289168.1 general odorant-binding protein 72-like [Halyomorpha halys]
XP_014288837.1 putative odorant-binding protein A10 isoform X2 [Halyomorpha halys]
XP_014286615.1 general odorant-binding protein 70 [Halyomorpha halys]
XP_014283301.1 general odorant-binding protein 56h-like [Halyomorpha halys]
XP_014291424.1 general odorant-binding protein 71 [Halyomorpha halys]
XP_014282895.1 general odorant-binding protein 69a [Halyomorpha halys]
XP_014282267.1 general odorant-binding protein 56h-like [Halyomorpha halys]
XP_014282192.1 general odorant-binding protein 56d-like [Halyomorpha halys]
XP_014281568.1 general odorant-binding protein 56d isoform X2 [Halyomorpha halys]
XP_014281562.1 general odorant-binding protein 56d isoform X1 [Halyomorpha halys]
XP_014281517.1 general odorant-binding protein 2 [Halyomorpha halys]
XP_014281486.1 general odorant-binding protein 19d-like [Halyomorpha halys]
XP_014281385.1 general odorant-binding protein 56a-like [Halyomorpha halys]
XP_024084565.1 general odorant-binding protein 19d-like [Cimex lectularius]
XP_024084564.1 general odorant-binding protein 56d-like isoform X2 [Cimex lectularius]
XP_024084563.1 general odorant-binding protein 56d-like isoform X1 [Cimex lectularius]
XP_014260439.1 general odorant-binding protein 70 [Cimex lectularius]
XP_014257013.1 general odorant-binding protein 83a-like [Cimex lectularius]
XP_014257012.1 general odorant-binding protein 56d-like [Cimex lectularius]
XP_014251232.1 general odorant-binding protein 68-like [Cimex lectularius]
XP_014247133.1 general odorant-binding protein 28a-like [Cimex lectularius]
XP_014247077.1 general odorant-binding protein 56h [Cimex lectularius]
XP_014246907.1 general odorant-binding protein 19d-like isoform X2 [Cimex lectularius]
XP_014246906.1 general odorant-binding protein 19d-like isoform X1 [Cimex lectularius]
XP_014239601.1 general odorant-binding protein 19d-like [Cimex lectularius]
ATU82923.1 secreted Odorant Binding Protein Family protein [Pristhesancus plagipennis]
ATU82922.1 secreted Odorant Binding Protein Family protein [Pristhesancus plagipennis]
ATU82921.1 secreted Odorant Binding Protein Family protein [Pristhesancus plagipennis]
ATU82920.1 secreted Odorant Binding Protein Family protein [Pristhesancus plagipennis]
ATU82919.1 secreted Odorant Binding Protein Family protein [Pristhesancus plagipennis]
ATU82918.1 secreted Odorant Binding Protein Family protein [Pristhesancus plagipennis]
ATU82917.1 secreted Odorant Binding Protein Family protein [Pristhesancus plagipennis]
ATU82916.1 secreted Odorant Binding Protein Family protein [Pristhesancus plagipennis]
ATU82773.1 secreted Odorant Binding Protein Family protein [Pristhesancus plagipennis]
XP_022206142.1 general odorant-binding protein 19d-like [Nilaparvata lugens]
XP_022204140.1 general odorant-binding protein 19d-like [Nilaparvata lugens]
XP_022203289.1 general odorant-binding protein 19d-like [Nilaparvata lugens]
XP_022200369.1 general odorant-binding protein 70 [Nilaparvata lugens]
XP_022200127.1 general odorant-binding protein 56d-like [Nilaparvata lugens]
XP_022194822.1 general odorant-binding protein 71 isoform X2 [Nilaparvata lugens]
XP_022194821.1 general odorant-binding protein 71 isoform X1 [Nilaparvata lugens]
XP_022194015.1 general odorant-binding protein 69a-like [Nilaparvata lugens]
XP_022191196.1 general odorant-binding protein 19d-like [Nilaparvata lugens]
XP_022191031.1 general odorant-binding protein 19a-like [Nilaparvata lugens]
XP_022178222.1 general odorant-binding protein 19d isoform X2 [Myzus persicae]
XP_022178221.1 general odorant-binding protein 19d isoform X1 [Myzus persicae]
XP_022172561.1 putative odorant-binding protein A10 [Myzus persicae]
XP_022168957.1 general odorant-binding protein 70 [Myzus persicae]
XP_022167631.1 general odorant-binding protein 71 [Myzus persicae]
XP_022165018.1 general odorant-binding protein 72-like [Myzus persicae]
XP_022165017.1 general odorant-binding protein 72-like [Myzus persicae]
XP_022165015.1 general odorant-binding protein 28a [Myzus persicae]
XP_022183495.1 putative odorant-binding protein A10 [Myzus persicae]
XP_022183152.1 putative odorant-binding protein A10 [Myzus persicae]
JAW15261.1 putative odorant-binding protein a10 obp, partial [Panstrongylus lignarius]
JAW14417.1 putative odorant-binding protein rproobp2 precursor obp, partial [Panstrongylus lignarius]
JAW13965.1 putative odorant-binding protein precursor [Panstrongylus lignarius]
JAW13950.1 putative odorant-binding protein 2, partial [Panstrongylus lignarius]
JAW13933.1 putative odorant-binding protein precursor, partial [Panstrongylus lignarius]
JAW13876.1 putative odorant-binding protein precursor obp, partial [Panstrongylus lignarius]
JAW13808.1 putative odorant binding protein 8 [Panstrongylus lignarius]
JAW13155.1 putative odorant binding protein, partial [Panstrongylus lignarius]
JAW12666.1 putative odorant binding protein obp, partial [Panstrongylus lignarius]
JAW12526.1 putative odorant binding protein, partial [Panstrongylus lignarius]
JAW12446.1 putative odorant binding protein obp, partial [Panstrongylus lignarius]
ASL05033.1 odorant binding protein 1 [Nilaparvata lugens]
ASL04980.1 odorant binding protein 5 [Nilaparvata lugens]
ARR95844.1 odorant binding protein 1 [Diaphorina citri]
ARO50006.1 odorant binding protein 7 [Daktulosphaira vitifoliae]
ARO50005.1 odorant binding protein 6 [Daktulosphaira vitifoliae]
ARO50004.1 odorant binding protein 5 [Daktulosphaira vitifoliae]
ARO50003.1 odorant binding protein 4 [Daktulosphaira vitifoliae]
ARO50002.1 odorant binding protein 3 [Daktulosphaira vitifoliae]
ARO50001.1 odorant binding protein 2 [Daktulosphaira vitifoliae]
ARO50000.1 odorant binding protein 1 [Daktulosphaira vitifoliae]
ARO46438.1 odorant binding protein 9 [Pachypeltis micranthus (nomen nudum)]
ARO46437.1 odorant binding protein 8 [Pachypeltis micranthus (nomen nudum)]
ARO46436.1 odorant binding protein 7 [Pachypeltis micranthus (nomen nudum)]
ARO46435.1 odorant binding protein 6 [Pachypeltis micranthus (nomen nudum)]
ARO46434.1 odorant binding protein 5 [Pachypeltis micranthus (nomen nudum)]
ARO46433.1 odorant binding protein 4 [Pachypeltis micranthus (nomen nudum)]
ARO46432.1 odorant binding protein 3 [Pachypeltis micranthus (nomen nudum)]
ARO46431.1 odorant binding protein 2 [Pachypeltis micranthus (nomen nudum)]
ARO46430.1 odorant binding protein 1 [Pachypeltis micranthus (nomen nudum)]
ARJ35775.1 odorant binding protein 10 [Cyrtorhinus lividipennis]
ARJ35774.1 odorant binding protein 9 [Cyrtorhinus lividipennis]
ARJ35773.1 odorant binding protein 8 [Cyrtorhinus lividipennis]
ARJ35772.1 odorant binding protein 7 [Cyrtorhinus lividipennis]
ARJ35771.1 odorant binding protein 6 [Cyrtorhinus lividipennis]
ARJ35770.1 odorant binding protein 5 [Cyrtorhinus lividipennis]
ARJ35769.1 odorant binding protein 4 [Cyrtorhinus lividipennis]
ARJ35768.1 odorant binding protein 3 [Cyrtorhinus lividipennis]
ARJ35767.1 odorant binding protein 2 [Cyrtorhinus lividipennis]
ARJ35766.1 odorant binding protein 1 [Cyrtorhinus lividipennis]
AMP19273.1 odorant-binding protein, partial [Sogatella furcifera]
AMD82868.1 odorant-binding protein 8 [Bemisia tabaci]
AHF71063.1 odorant-binding protein 32 [Lygus lineolaris]
AHF71062.1 odorant-binding protein 31 [Lygus lineolaris]
AHF71061.1 odorant-binding protein 30 [Lygus lineolaris]
AHF71060.1 odorant-binding protein 29 [Lygus lineolaris]
AHF71059.1 odorant-binding protein 28 [Lygus lineolaris]
AHF71058.1 odorant-binding protein 27, partial [Lygus lineolaris]
AHF71057.1 odorant-binding protein 26 [Lygus lineolaris]
AHF71056.1 odorant-binding protein 25 [Lygus lineolaris]
AHF71055.1 odorant-binding protein 24 [Lygus lineolaris]
AHF71054.1 odorant-binding protein 33, partial [Lygus lineolaris]
AHF71053.1 odorant-binding protein 23 [Lygus lineolaris]
AHF71052.1 odorant-binding protein 22, partial [Lygus lineolaris]
AHF71051.1 odorant-binding protein 21 [Lygus lineolaris]
AHF71050.1 odorant-binding protein 20 [Lygus lineolaris]
AHF71049.1 odorant-binding protein 19 [Lygus lineolaris]
AHF71048.1 odorant-binding protein 18c [Lygus lineolaris]
AHF71047.1 odorant-binding protein 18b [Lygus lineolaris]
AHF71046.1 odorant-binding protein 18a [Lygus lineolaris]
AHF71045.1 odorant-binding protein 17 [Lygus lineolaris]
AHF71044.1 odorant-binding protein 16b [Lygus lineolaris]
AHF71043.1 odorant-binding protein 16a [Lygus lineolaris]
AHF71042.1 odorant-binding protein 15 [Lygus lineolaris]
AHF71041.1 odorant-binding protein 14 [Lygus lineolaris]
AHF71040.1 odorant-binding protein 13 [Lygus lineolaris]
AHF71039.1 odorant-binding protein 12 [Lygus lineolaris]
AHF71038.1 odorant-binding protein 11 [Lygus lineolaris]
AHF71037.1 odorant-binding protein 10 [Lygus lineolaris]
AHF71036.1 odorant-binding protein 9 [Lygus lineolaris]
AHF71035.1 odorant-binding protein 8 [Lygus lineolaris]
AHF71034.1 odorant-binding protein 7, partial [Lygus lineolaris]
AHF71033.1 odorant-binding protein 6 [Lygus lineolaris]
AHF71032.1 odorant-binding protein 5 [Lygus lineolaris]
AHF71031.1 odorant-binding protein 4 [Lygus lineolaris]
AHF71030.1 odorant-binding protein 3 [Lygus lineolaris]
AHF71029.1 odorant-binding protein 2 [Lygus lineolaris]
AHF71028.1 odorant-binding protein 1 [Lygus lineolaris]
AQS80480.1 odorant binding protein 7, partial [Bemisia tabaci]
AQS80479.1 odorant binding protein 6, partial [Bemisia tabaci]
AQS80478.1 odorant binding protein 5, partial [Bemisia tabaci]
AQS80477.1 odorant binding protein 4, partial [Bemisia tabaci]
AQS80476.1 odorant binding protein 3, partial [Bemisia tabaci]
AQS80475.1 odorant binding protein 2, partial [Bemisia tabaci]
AQS80474.1 odorant binding protein 1, partial [Bemisia tabaci]
AQM58353.1 venom odorant binding family protein 1 [Pristhesancus plagipennis]
APX56329.1 odorant-binding protein 30 [Halyomorpha halys]
AOV87046.1 odorant-binding protein 29 [Halyomorpha halys]
AOV87045.1 odorant-binding protein 28 [Halyomorpha halys]
AOV87044.1 odorant-binding protein 27 [Halyomorpha halys]
AOV87043.1 odorant-binding protein 26 [Halyomorpha halys]
AOV87042.1 odorant-binding protein 25 [Halyomorpha halys]
AOV87041.1 odorant-binding protein 24 [Halyomorpha halys]
AOV87040.1 odorant-binding protein 23 [Halyomorpha halys]
AOV87039.1 odorant-binding protein 22 [Halyomorpha halys]
AOV87038.1 odorant-binding protein 21 [Halyomorpha halys]
AOV87037.1 odorant-binding protein 20 [Halyomorpha halys]
AOV87036.1 odorant-binding protein 19 [Halyomorpha halys]
AOV87035.1 odorant-binding protein 18 [Halyomorpha halys]
AOV87034.1 odorant-binding protein 17 [Halyomorpha halys]
AOV87033.1 odorant-binding protein 16 [Halyomorpha halys]
AOV87032.1 odorant-binding protein 15 [Halyomorpha halys]
AOV87031.1 odorant-binding protein 14 [Halyomorpha halys]
AOV87030.1 odorant-binding protein 13 [Halyomorpha halys]
AOV87029.1 odorant-binding protein 12 [Halyomorpha halys]
AOV87028.1 odorant-binding protein 11 [Halyomorpha halys]
AOV87027.1 odorant-binding protein 10 [Halyomorpha halys]
AOV87026.1 odorant-binding protein 9 [Halyomorpha halys]
AOV87025.1 odorant-binding protein 8 [Halyomorpha halys]
AOV87024.1 odorant-binding protein 7 [Halyomorpha halys]
AOV87023.1 odorant-binding protein 6 [Halyomorpha halys]
AOV87022.1 odorant-binding protein 5 [Halyomorpha halys]
AOV87021.1 odorant-binding protein 4 [Halyomorpha halys]
AOV87020.1 odorant-binding protein 3 [Halyomorpha halys]
AOV87019.1 odorant-binding protein 2 [Halyomorpha halys]
AOV87018.1 odorant-binding protein 1 [Halyomorpha halys]
AHJ80897.1 odorant binding protein 11 [Aphis glycines]
AHJ80894.1 odorant binding protein 8 [Aphis glycines]
AHJ80893.1 odorant binding protein 7 [Aphis glycines]
AHJ80889.1 odorant binding protein 3 [Aphis glycines]
AHJ80888.1 odorant binding protein 2 [Aphis glycines]
XP_018912432.1 PREDICTED: putative odorant-binding protein A5 isoform X1 [Bemisia tabaci]
XP_018912431.1 PREDICTED: putative odorant-binding protein A5 isoform X1 [Bemisia tabaci]
XP_018911676.1 PREDICTED: putative odorant-binding protein A5 [Bemisia tabaci]
XP_018911639.1 PREDICTED: putative odorant-binding protein A5 isoform X1 [Bemisia tabaci]
XP_018909758.1 PREDICTED: putative odorant-binding protein A5 [Bemisia tabaci]
XP_018909541.1 PREDICTED: putative odorant-binding protein A5 [Bemisia tabaci]
XP_018909540.1 PREDICTED: putative odorant-binding protein A5 [Bemisia tabaci]
XP_018909539.1 PREDICTED: putative odorant-binding protein A5 [Bemisia tabaci]
XP_018909538.1 PREDICTED: putative odorant-binding protein A5 [Bemisia tabaci]
XP_018909537.1 PREDICTED: putative odorant-binding protein A5 [Bemisia tabaci]
XP_018915358.1 PREDICTED: putative odorant-binding protein A5 isoform X3 [Bemisia tabaci]
XP_018915356.1 PREDICTED: putative odorant-binding protein A5 isoform X1 [Bemisia tabaci]
[truncated: 73,637 more chars]
